1 **Systematic identification of yeast mutants with increased rates of cell death reveals rapid**  
2 **stochastic necrosis associated with cell division**

3

4 Alexander I. Alexandrov <sup>1#\*</sup>, Erika V. Grosfeld <sup>3,1#</sup>, Olga V. Mitkevich<sup>1</sup>, Victoria A. Bidyuk<sup>1</sup>,  
5 Arina V. Nostaeva <sup>1,4</sup>, Igor V. Kukhtevich<sup>5</sup>, Robert Schneider <sup>5,6</sup>, Evgeniy S. Shilov <sup>7</sup>, Vitaliy V.  
6 Kushnirov<sup>1</sup>, Sergey E. Dmitriev <sup>2,8\*</sup>, Vadim N. Gladyshev<sup>9\*</sup>

7 <sup>1</sup>*Bach Institute of Biochemistry, Federal Research Center of Biotechnology of the RAS, Moscow,*  
8 *119071, Russia*

9 <sup>2</sup>*Belozersky Institute of Physico-Chemical Biology, Lomonosov Moscow State University, Moscow,*  
10 *119234, Russia*

11 <sup>3</sup>*Moscow Institute of Physics and Technology (National Research University), Dolgoprudny, 141700*  
12 *Russia*

13 <sup>4</sup>*Higher School of Economics, Faculty of Computer Science, 109028, Moscow, Russia*

14 <sup>5</sup>*Institute of Functional Epigenetics, Helmholtz Zentrum München, Neuherberg D-85764, Germany*

15 <sup>6</sup>*German Center for Diabetes Research, Neuherberg D-85764, Germany*

16 <sup>7</sup>*Biological Faculty, Lomonosov Moscow State University, Moscow, 119992 Russia*

17 <sup>8</sup>*School of Bioengineering and Bioinformatics, Lomonosov Moscow State University, Moscow,*  
18 *119234 Russia*

19 <sup>9</sup>*Division of Genetics, Department of Medicine, Brigham and Women's Hospital and Harvard*  
20 *Medical School, Boston MA 02115, USA*

21 #These authors contributed equally to this work

22 \* Corresponding author

23 Correspondence to: [vgladyshev@rics.bwh.harvard.edu](mailto:vgladyshev@rics.bwh.harvard.edu) (V.N.G.)

24 Correspondence may also be addressed to: [alexvir@inbi.ras.ru](mailto:alexvir@inbi.ras.ru) (A.I.A.) and

25 [sergey.dmitriev@belozersky.msu.ru](mailto:sergey.dmitriev@belozersky.msu.ru) (S.E.D.)

26 Running title: (50 characters) Genome-wide screening for necrotic cell death

27

1 ***Abstract***

2

3 Cell death plays a major role in development, pathology and aging and can be triggered by various  
4 types of acute external and internal stimuli, such as chemicals or mutations. However, little is  
5 known about chronic cell death in the context of continuing cell division. Here, we performed a  
6 genome-wide search for mutants with this type of death in dividing bakers yeast by assaying the  
7 accumulation of phloxine B, which stains dead cells. We identified 83 essential and 43 non-essential  
8 gene mutants. Surprisingly, three distinct types of spatial distribution of dead cells in colonies were  
9 observed which corresponded to gene ontology enrichments for (i) DNA replication and repair,  
10 RNA processing, chromatin organization, and nuclear transport; (ii) mitosis and cytokinesis; and  
11 (iii) vesicular transport and glycosylation/cell wall homeostasis. We further developed methods for  
12 analyzing the death of newborn cells (DON) and cell death in real time using microfluidics-based  
13 microscopy which revealed rapid stochastic necrosis during bud generation or cytokinesis without  
14 prior division arrest. This coincided with commonality of sensitivity to some plasma membrane and  
15 cell-wall perturbing agents, as well as mitigating effects of increasing external pH for most of the  
16 tested mutants. Our results suggest that rapid stochastic necrosis during cell division is a common  
17 type of cell death resulting from the dysfunction of different genes, and that this type of death seems  
18 to have a common proximal cause which might be related to the properties of the cell wall and/or  
19 plasma membrane.

20

## 1 **Introduction**

2 The cell is a complex agglomerate of components and systems that act in concert to achieve  
3 sustainable replication of the entire assembly. Cellular machinery is largely made up of proteins,  
4 some of which are more dispensable than others (1). The absence of indispensable (essential)  
5 proteins makes cells inviable, precludes them from replicating or, at the organismal level, blocks  
6 development. Identification of essential proteins and their characterization has yielded important  
7 insights into the functions of different cellular systems (2–5). However, the indispensability of a  
8 certain protein is a complex phenomenon, which may have several causes. At the cellular level, the  
9 lack of some essential proteins may create insurmountable problems for cell division, while  
10 deficiency of others may trigger cell death, i.e. spontaneous or programmed catastrophic failure of  
11 the cellular machinery. Importantly, cell death is most likely an integrative process that is realized  
12 via the complex interactions between different cellular systems (6). So, systematic understanding of  
13 triggers of cell death at the level of individual genes as well as gene interaction networks that  
14 mediate death can be very informative for a systems-level understanding of a cell.

15 Cell death is known to proceed via distinct mechanisms. Specifically, studies performed with  
16 mammalian cells have revealed more than 30 types of cell death (7), although they can be grouped  
17 into several larger categories (8). Despite the fact that many of the mechanisms involved in cell  
18 death in response to various pathologies and conditions have been established, specific and  
19 systematic understanding of the genes and systems whose perturbation can trigger necrotic death  
20 remains poorly understood. Our recent systematic review on the subject of external treatments that  
21 can cause different types of cell death in yeast and other fungi (10.3390/jof7110886) highlights that  
22 while numerous acute treatments are known to stop cell division and kill cells, little is known about  
23 whether and how cells die in conditions where division can proceed.

24 The budding yeast *Saccharomyces cerevisiae* has been an immensely useful model in the analysis of  
25 lifespan and aging (9, 10), and also is an established model for the analysis of cell death (11–14).  
26 However, even in this simple and tractable model, there have been no systematic studies on genes  
27 whose perturbations can increase death rate. Consequently, there is also no understanding of the  
28 temporal dynamics of cell death during chronic or acute perturbation of different genes, nor data on  
29 whether death at an early replicative age is even relevant to this organism.

30 High-throughput testing of mutants for various phenotypes in microorganisms is very efficient, due  
31 to the ability of cells to grow in colonies on solid medium, which can be arrayed in ordered and  
32 dense arrays on single plates. Colonies of yeast and other microbes are dense agglomerations of

1 cells which might seem like simple lumps of cells, but they are actually quite complex structures.  
2 This is especially true for wild yeast isolates, but even the laboratory strains, which lose the ability  
3 to form colonies with visible morphological complexity (15), exhibit various aspects of cell  
4 differentiation when grown in a colony (16). A probable reason for this diversity is that the colonies  
5 create gradients of various conditions from the outside surface to the internal regions, which, in turn,  
6 affect the behavior of cells in each region. However, this diversity has not been probed in a  
7 systematic fashion, and only fragmentary data are currently available in yeast (16–18), while studies  
8 of this phenomenon in prokaryotes have been more active (19). Currently, there is almost no data on  
9 how the location of yeast cells in colonies may affect their susceptibility to various perturbations,  
10 although this may be highly relevant for the killing of various pathogenic fungi using antifungal  
11 drugs.

12 In this work, we identified genes, whose perturbation increases the rate of cell death accompanied  
13 by membrane permeabilization, i.e. necrotic cell death, in dividing cultures by using the nontoxic  
14 stain phloxine B (20–22). The identified mutants exhibited distinct spatial patterns of death in  
15 colonial multicellular structures. We further developed novel tools to characterize the temporal  
16 dynamics and the age-specific nature of cell division arrest and cell death. These methods allowed  
17 us to determine that, in many mutants exhibiting increased death rates, mother and daughter cells  
18 may rapidly die in a stochastic manner during budding and cytokinesis and that this type of death  
19 seems to be related to perturbations in the functioning of the cell wall and membrane. Surprisingly,  
20 death can be mitigated by neutral pH stabilization of the medium, although the mechanism  
21 responsible for this effect is unknown. Our discovery of this novel mode of necrotic death showed  
22 that cell division is a highly sensitive period of development and suggests that this type of death may  
23 be a common consequence of the dysfunction of various genes, making this finding highly relevant  
24 for our understanding of both pathology and aging.

25

## 26 **Results**

### 27 **Phloxine B staining of yeast colonies as a high-throughput method for detection of cell death**

28 In order to identify mutants with increased rates of cell death, we employed the yeast knock-out (23)  
29 and essential knock-down (DAMP) (24) collections. To identify colonies with increased numbers of  
30 dead cells we adapted the use of phloxine B (Figure 1A) (20, 21) for high-throughput screening.  
31 Phloxine B is a negatively charged dye that only enters cells with impaired membrane permeability,

1 i.e. those that have experienced necrotic death. Thus, if a colony contains mostly live cells, phloxine  
2 B would not stain this colony. However, if a colony has live cells (all colonies have live cells,  
3 otherwise they would not grow) and a substantial number of dead cells, the dead cells (Figure 1B)  
4 and therefore the colony would be stained in various shades of red. Plates containing phloxine B  
5 with yeast mutants were imaged after 2 days of growth (Supplemental archive 1), and the mutants  
6 exhibiting clear phloxine B staining were collected and replated onto new phloxine B plates, along  
7 with control strains, confirming the phenotype (Figure S1). To avoid population heterogeneity due  
8 to the emergence of suppressor mutants, all selected strains were streaked to single colonies with  
9 identical phenotypes, and further work was done on the progeny of single phloxine B positive  
10 colonies taken from cryostorage. Overall, this procedure identified a total of 126 mutants in both  
11 collections, with 83 originating from the collection of mutants with downregulated essential proteins  
12 (out of 879 strains), and 43 from the knockout collection (out of 5117 strains) (Figure 1C, Dataset  
13 S1). Thus, essential genes were strongly overrepresented among the genes whose dysfunction  
14 increases the chance of cell death.

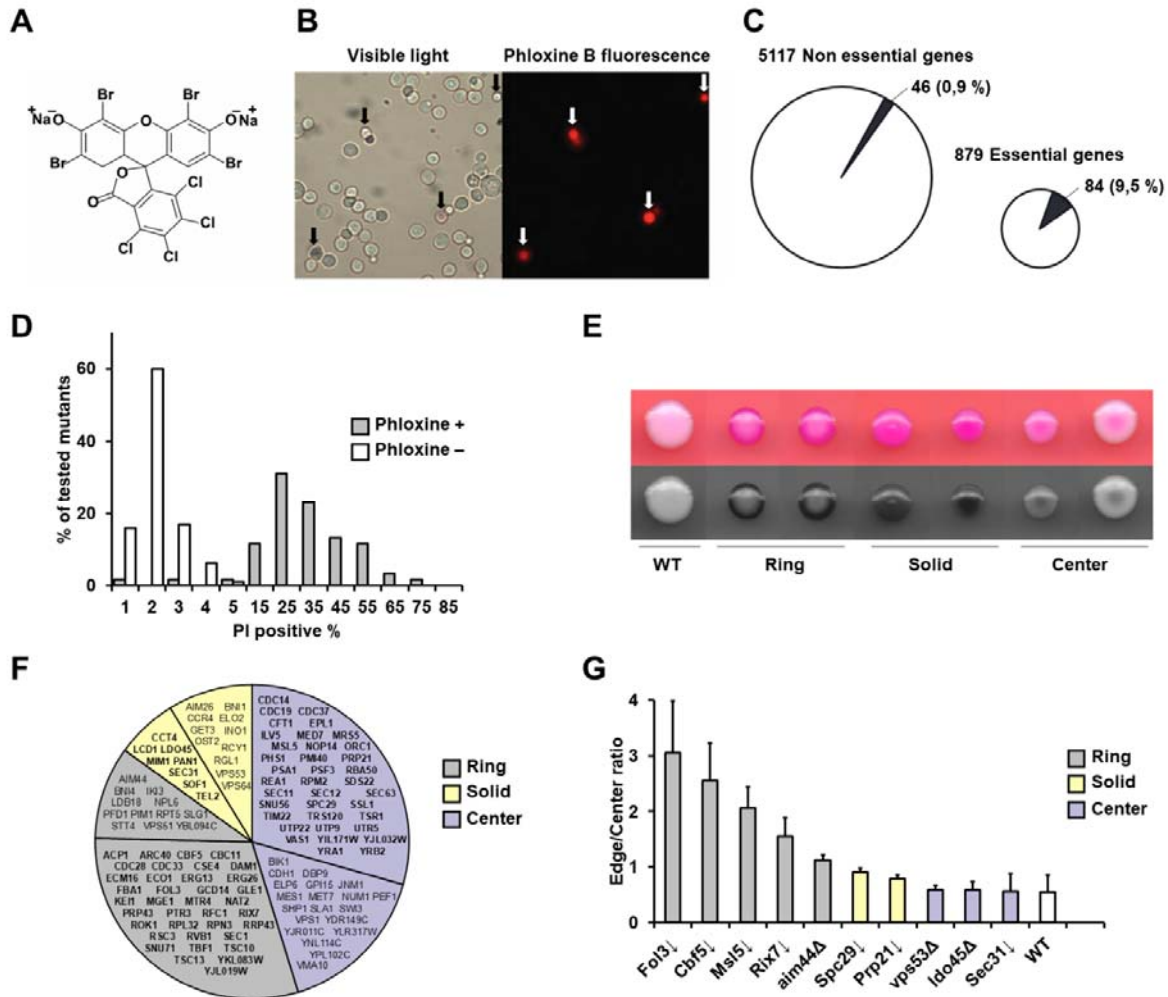

1

2 **Figure 1. Phloxine B staining of mutant colonies provides spatial information on the distribution of dead cells.** (A)

3 Structure of phloxine B. (B) Fluorescent microscopy of dead cells using phloxine B. Arrows indicate dead cells. (C)

4 Numbers of phloxine B positive mutants among the mutants with deletions of non-essential genes and downregulation of

5 essential genes. (D) Distribution of percentage of PI positive cells, obtained by a flow cytometric analysis of suspensions

6 of yeast cells stained with PI. The number of phloxine B positive mutants was 61 and phloxine B negative mutants and

7 wild type strain was 95. Measurements were performed in stationary cultures at least 2 times for each strain. (E)

8 Colonies of the representative staining types grown for 48 hours on YPD containing phloxine B, depicted under the

9 colony images. Specific mutants are (from left to right) – wild type, and downregulation of CDC33, CDC11, SPC29,

10 UTR5, SEC31 and RSC58 genes. Top panel – natural color, lower panel – green channel which provides maximal

11 contrast for viewing phloxine B staining. (F) Genes associated with increased phloxine B staining. Colored sectors

12 depict the phenotypic class (Ring, Solid, Center), regular font shows non-essential genes, and essential genes are shown

13 in bold. (G) Ratio of the percentage of PI positive cells in cell suspensions obtained from the edge and center of yeast

14 colonies grown for 48 hours on YPD medium. 3 colonies were analyzed for each strain, and error bars depict standard

15 deviation.

1 To verify that phloxine B staining provides data comparable to more commonly used methods of  
2 detecting dead cells, we used propidium iodide (PI) staining, which stains nucleic acids in cells with  
3 permeable membranes. For this, we tested 61 of our phloxine B positive mutants, as well as a panel  
4 of 90 random phloxine B negative mutants from the DAMP collection. We found that the phloxine  
5 B negative mutants exhibited less than 4% PI positive cells, whereas more than 80% of the tested  
6 phloxine B positive strains contained more than 15% PI positive cells (Figure 1D). Thus, the use of  
7 phloxine B staining of colonies offers a qualitative, high-throughput assay that provides results in  
8 agreement with PI staining of *S. cerevisiae* liquid cultures.

9 We considered the possibility that increased staining could be related to an altered stain uptake or its  
10 removal by the yeast cells rather than due to cell death. To check this possibility, we tested whether  
11 phloxine B staining was dependent on the action of drug efflux pumps. Comparison of a wild-type  
12 strain and a mutant with deleted *PDR3* and *PDR5* genes, which are the main efflux pumps in yeast,  
13 showed that the latter exhibited a slightly reduced, rather than increased, phloxine B staining  
14 compared to wild type (Figure S2).

### 15 **Phloxine B reveals spatial patterns of cell death in yeast colonies**

16 One observation that immediately attracted our attention during the screen was that phloxine B  
17 staining patterns differed between the colonies of different mutants (Figure 1E, Figure S1). A large  
18 number of strains exhibited a pattern of staining where only the border of the colony was stained,  
19 while the center was much lighter (hereafter called “Ring” mutants). Other mutants exhibited more  
20 or less homogenous staining (“Solid” mutants), while the third class of mutants exhibited staining  
21 mostly in the center of the colony, albeit mutants with a strong phenotype like this were rare  
22 (“Center” mutants). Overall, out of the 126 mutants, 51 possessed the Ring phenotype, 56 – Solid,  
23 and 19 - Center (Figure 1F, Dataset S1).

24 In order to exclude phloxine B-specific effects, such as toxicity or diffusion gradients, colonies were  
25 grown on medium without phloxine B, after which cells were collected from the edges and center of  
26 the colonies and assayed for the percentage of cells stainable by PI. The ratio between these  
27 percentages represents the degree to which more dead cells are present on the outside of the colony  
28 as opposed to the center and were in excess of 1.5 for the Ring mutants, around 0.5 for the Center  
29 mutants, and close to 1 for the Solid mutants (Figure 1G). Colonies of the wild type strain had very  
30 few dead cells, and thus the results were highly variable; however, the ratio suggested that in wild  
31 type colonies, dead cells might be more numerous in the center. Overall, the data revealed that

1 phloxine B staining offered a convenient qualitative test for determining the spatial distribution of  
2 dead cells in yeast colonies.

### 3 **Functional analysis of genes whose perturbation increases cell death**

4 Using GO-term enrichment analysis of genes whose perturbation increases cell death, we observed  
5 enrichment of genes associated with cell division (including those involved in the cell cycle, as well  
6 as tubulin and actin cytoskeleton) and establishment of localization in the cell (Fig. 2A). The cell  
7 cycle and cytoskeletal categories mostly overlapped; however, the localization category overlapped  
8 with the latter two only partially (Fig. 2A). Genes belonging to these categories accounted for ~45%  
9 of the genes found to increase cell death.

10 We further employed the SAFE algorithm (25) to understand if the identified genes cluster to some  
11 specific parts of the cellular gene interaction network obtained by systematic measurements (26).  
12 This analysis revealed enrichment in interactions with the genes involved in DNA replication &  
13 repair, mitosis & chromosome segregation, cell polarity and morphogenesis, transcription &  
14 chromatin organization categories, which agrees with the GO term analysis results, as well as other  
15 categories such as vesicle traffic, glycosylation and protein folding/targeting and cell wall  
16 biosynthesis, MVB sorting & pH-dependent signaling, mRNA processing, and rRNA & ncRNA  
17 processing. Notably, enrichment patterns for different phloxine B staining types were distinct, with  
18 the Center phenotype forming a compact cluster in the regions corresponding to vesicle traffic,  
19 glycosylation & protein folding/targeting & cell wall biosynthesis; MVB sorting/pH-dependent  
20 signaling; cell polarity and morphogenesis, while the genes whose perturbation causes the Ring  
21 phenotype were mostly found in the regions corresponding to MVB sorting/pH-dependent signaling  
22 and mitosis & chromosome segregation. For the Solid phenotype, interacting genes clustered with a  
23 wider range of categories - tRNA wobble modification; mRNA processing; rRNA and ncRNA  
24 processing; mitosis & chromosome segregation, DNA replication & repair and transcription &  
25 chromatin organization. Overall, the SAFE distribution for mutants identified by phloxine B  
26 screening was similar to that of essential genes from the DAMP collection (Figure 2C, right panel),  
27 even though 1/3 of our dataset consisted of non-essential genes (Figure 2C, left panel). Notable  
28 differences included the absence of enrichment for the protein folding category among the mutants  
29 exhibiting phloxine B staining, and the emergence of the tRNA wobble modification category,  
30 which was absent in the essential gene enrichment pattern.

31



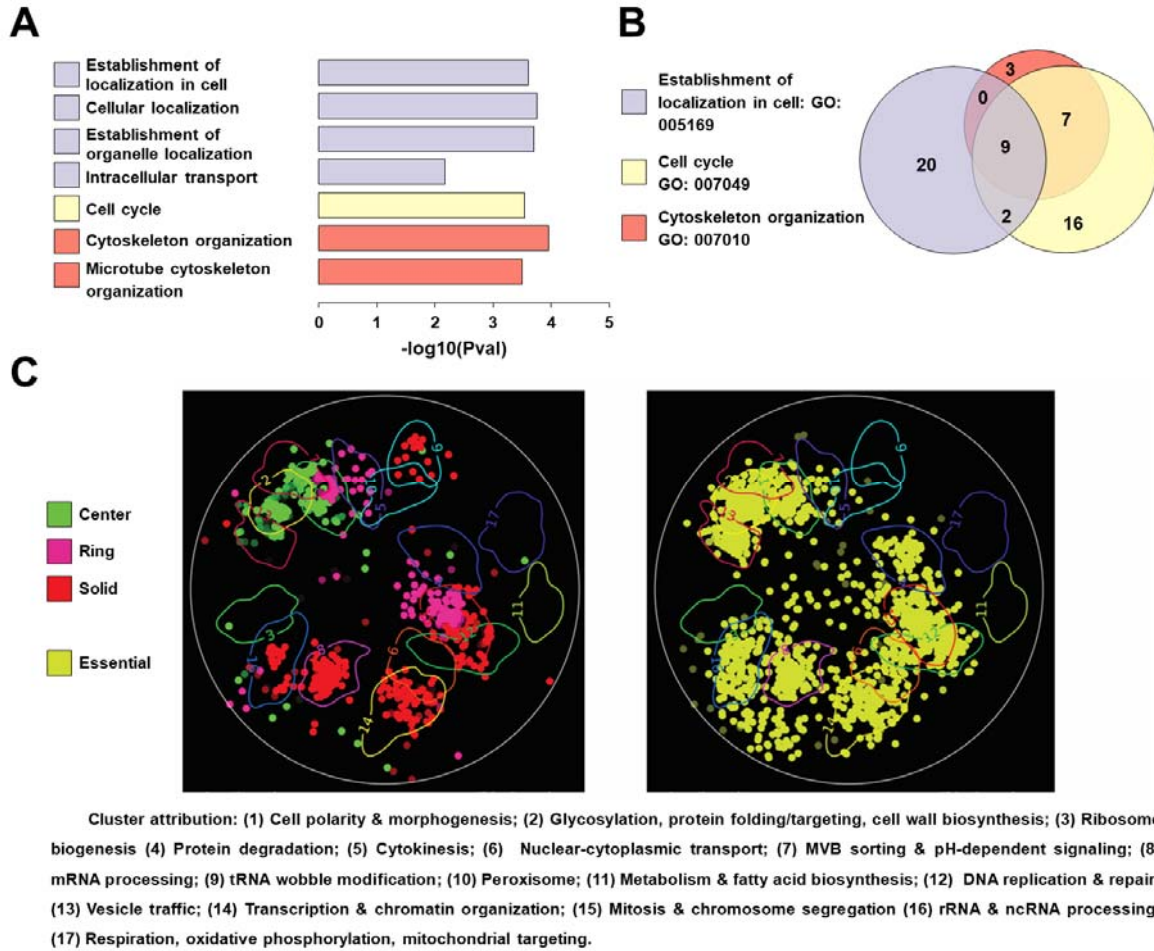

1

2

3 **Figure 2. Enrichment analysis of genes identified by phloxine B staining.** (A) GO-term enrichment analysis. Bars  
 4 with the same color denote GO-terms which are nested into each other. (B) Venn diagram of the identified GO-term  
 5 enrichment with the number of genes in each sector. (C) SAFE-analysis of the identified genes presenting specific  
 6 phloxine B staining patterns with color coding (green – center, magenta – ring, red – solid) (left) and all essential genes  
 7 from the DAMP collection (yellow) (right). Spots indicate genes that represent nodes of the interaction network enriched  
 8 for interactions with the input list of genes. Spot brightness indicates p-value of enrichment. Cluster attribution: (1) Cell  
 9 polarity & morphogenesis; (2) Glycosylation, protein folding/targeting, cell wall biosynthesis; (3) Ribosome biogenesis  
 10 (4) Protein degradation; (5) Cytokinesis; (6) Nuclear-cytoplasmic transport; (7) MVB sorting & pH-dependent  
 11 signaling; (8) mRNA processing; (9) tRNA wobble modification; (10) Peroxisome; (11) Metabolism & fatty acid  
 12 biosynthesis; (12) DNA replication & repair; (13) Vesicle traffic; (14) Transcription & chromatin organization; (15)  
 13 Mitosis & chromosome segregation (16) rRNA & ncRNA processing; (17) Respiration, oxidative phosphorylation,  
 14 mitochondrial targeting.

15

16 **Pervasive death of daughter cells**

1 It is unclear whether the dead cells accumulating in colonies and liquid cultures resulted from cells  
2 dying quickly after birth, or if cell death occurred after a prolonged period of division arrest. In  
3 order to answer this question, we devised an assay to detect death of recently born daughter cells  
4 (Figure 3A). In brief, cells were labeled with a membrane-impermeant fluorophore that stains  
5 amino-groups in the cell wall, and the cells were allowed to divide 1-2 times. This generated a  
6 population of unstained replicatively young cells, whose chance of death can be determined by a  
7 flow-cytometric analysis of PI staining (Figure 3B). We termed this method the DON assay (Death  
8 of Newborns). DON supported a clear distinction between mutant and wild type strains and  
9 demonstrated that a notable percentage of cell born during 1-2 divisions experienced death, i.e.  
10 membrane permeabilization occurred relatively quickly after appearance of these cells. We found  
11 that for ~95% of our identified mutants, young mutant cells were at least 3-fold more likely to die as  
12 compared to the wild type (Figure 3C, Dataset S2). Aging cells also seemed to experience death,  
13 however interpreting the relative chance of cell death between young cells and aged cells is difficult,  
14 because a portion of the dead aged cells originate from cells that were dead during staining, i.e. the  
15 results are not easily interpreted.

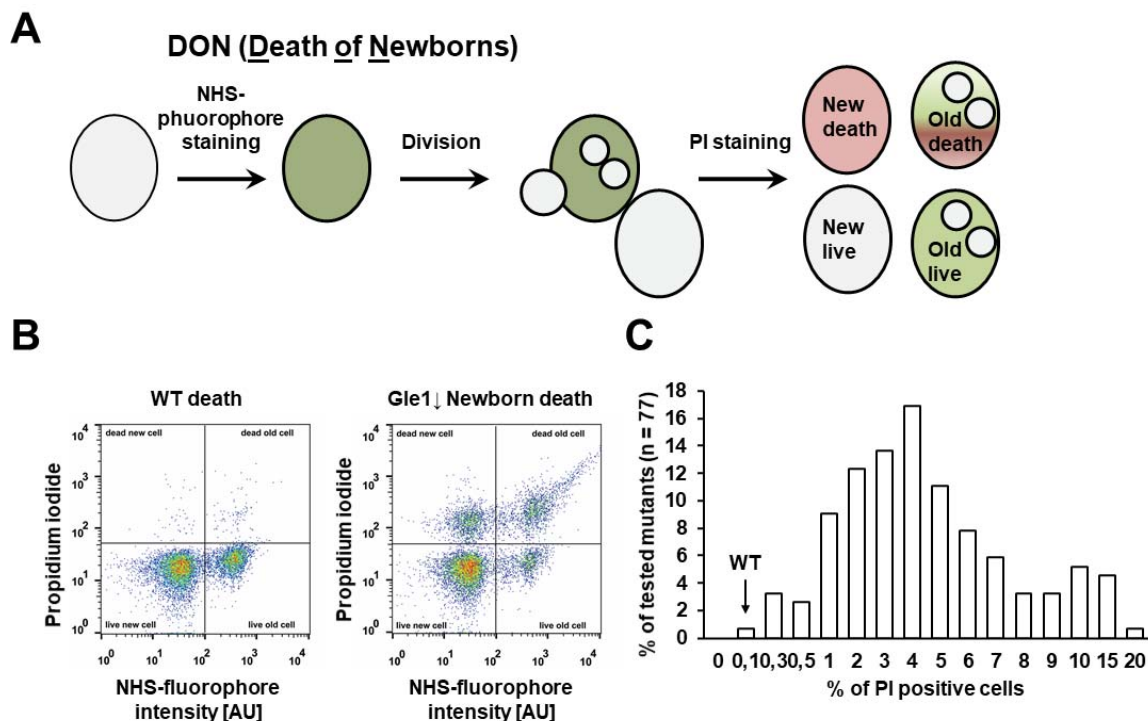

16

17 **Figure 3. Phloxine B positive mutants exhibit increased chance of rapid death in early life.** (A) Schematic of the  
18 method to assay death of newborn cells (DON). (B) Scatter plots of cells not exhibiting (left) or exhibiting (right)  
19 considerable death of newborn cells, as obtained by flow cytometry. (C) Distribution of percentage of PI-positive cells

1 in various tested mutants and WT strain in young cells as assayed using the DON method (number of analyzed mutants  
2 – 77). Each strain was analyzed twice in independent experiments, with a similar trend being observed.

3

#### 4 **Real time analysis of cell death**

5 In order to monitor death of both mother and daughter cells, as well as to determine how quickly cell  
6 death occurs and whether there are some changes to the cell prior to death, we decided to use real-  
7 time microscopy in the presence of phloxine B. We also wanted to test whether PI/phloxine B  
8 staining might occur transiently, without cell death, as reported under specific circumstances (27–  
9 29). Thus, we monitored the division and permeabilization of cells in the presence of phloxine B.  
10 Due to the labor intensity of microfluidic assays, we analyzed only 5 strains: 4 phloxine B positive  
11 strains, and a WT strain. First, we found that strains selected based on colony staining indeed  
12 commonly exhibited cells that acquired phloxine B staining during culturing (Figure 4A and Videos  
13 1 and 2). We did not observe any cells that proceeded through division after they had acquired  
14 robust phloxine B staining. We also found that phloxine B acquisition correlated with increased  
15 transparency in the phase contrast channel (Figure 4C,D), indicating a considerable change of phase  
16 properties, as was noted previously during the quantitative phase contrast microscopy study of yeast  
17 death in response to plant defensin treatment (30). The same is also observed in human cells (31).  
18 This increased transparency was somewhat reduced after it appeared, while the phloxine B signal  
19 increased and persisted indefinitely. Notably, cells stained with phloxine B did not disappear or  
20 experience complete lysis in any of the tested strains during our observations. Also, we did not  
21 observe any considerable number of phloxine B negative cells that arrested division, which suggests  
22 that no other, non-permeabilizing type of death or probabilistic shift into quiescence took place  
23 (Dataset S3).

24 A common occurrence in the phloxine B positive strains was that they exhibited high levels of cell  
25 death at the budding stage. For all of the tested strains, this represented 30-75% of the dead cells  
26 observed (Figure 4B, C and Video 1). Also, cells quite often died shortly after cytokinesis (Figure  
27 4B, D and Video 2). Notably, in both cases, death could sometimes be observed only in the daughter  
28 cell, only in the mother cell, or in both the cells without any discernible pattern.

29 Death during cytokinesis could sometimes be observed to proceed in a curious manner, involving  
30 the formation of a phloxine B stained area between the separating cells, which is stable for several  
31 minutes, but then phloxine B proceeds to enter one or both of the separating cells (Figure 4D and

1 Video 3). This suggests that a structure, partially separated from the rest of the mother and daughter  
2 cells is being penetrated by the stain. Judging by the morphology of the structure, it is localized to  
3 the bud neck and might be related to cell wall and/or membrane structures that have been  
4 demonstrated in electron microscopic images of dividing yeast (32, 33), but have not received much  
5 attention since. The data indicate that budding and cytokinesis represent the highest risk periods of  
6 the yeast lifecycle, when perturbation of different systems seemingly unrelated with these processes  
7 can increase the likelihood of a catastrophic failure.

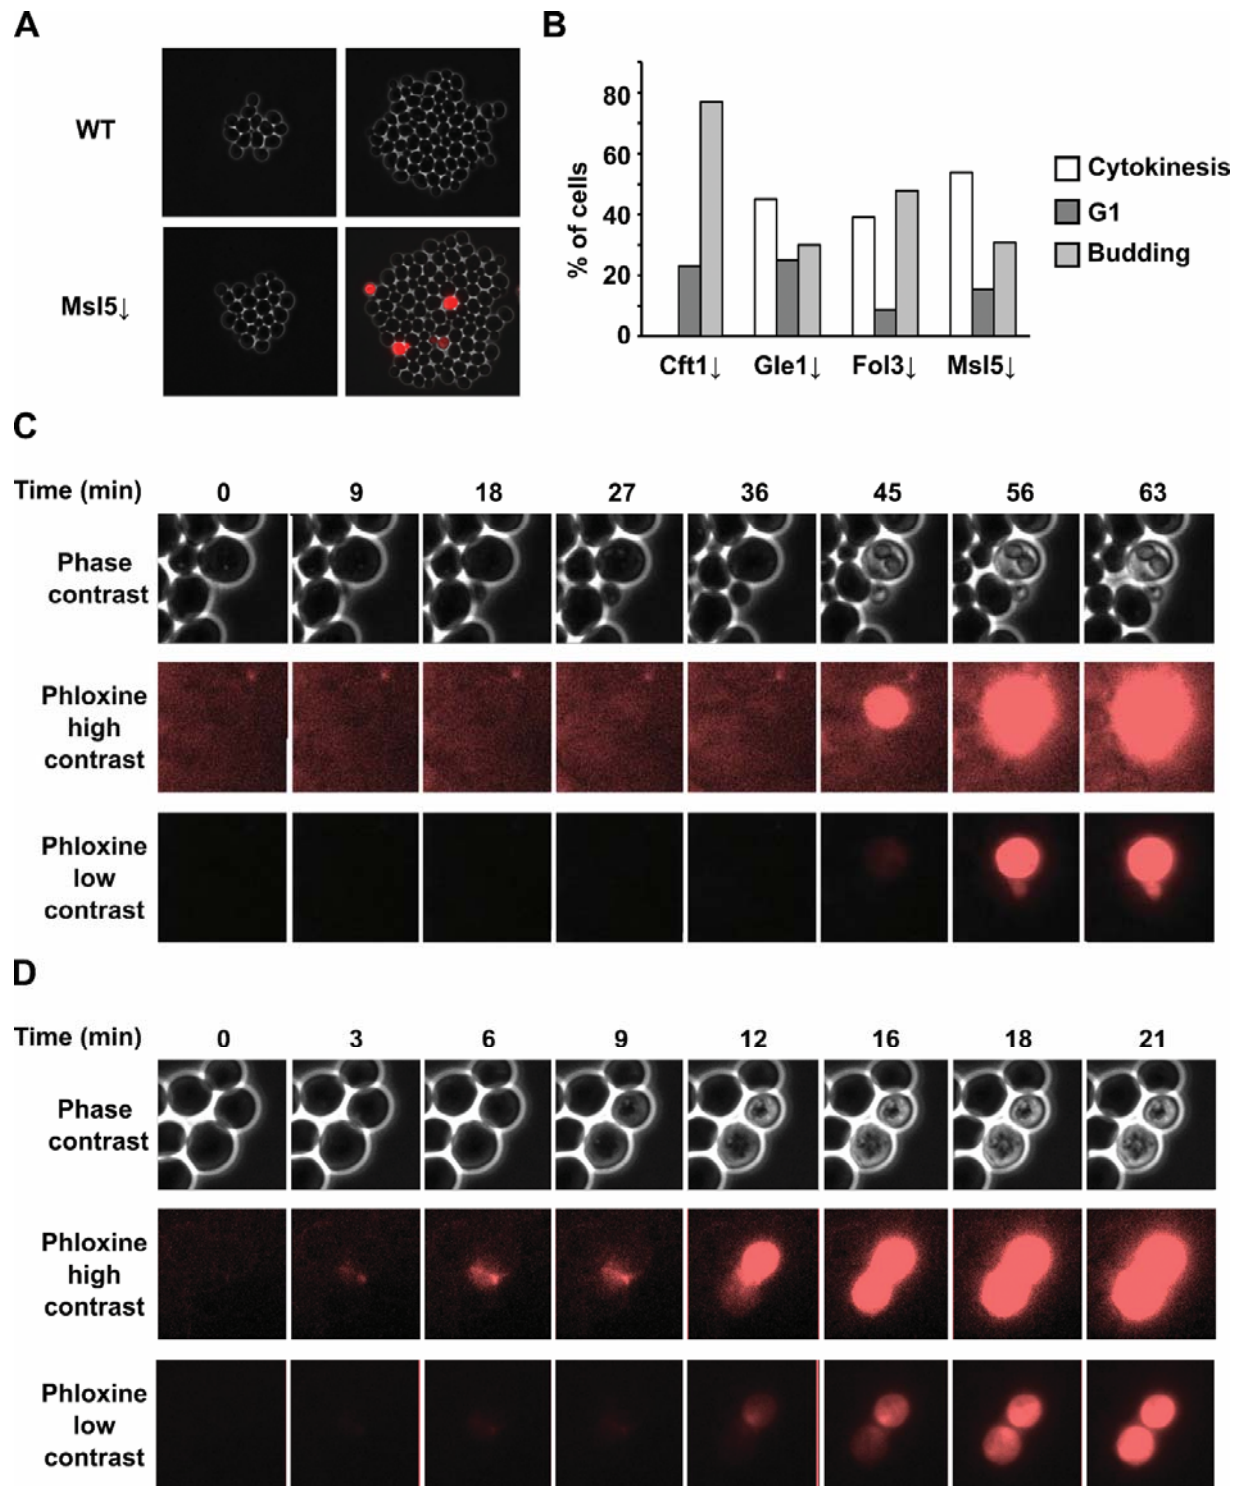

1

2 **Figure 4. Real-time visualization of cell death accompanied by membrane permeabilization.** Cells were grown in  
 3 a microfluidics chamber supplied with YPD medium containing phloxine B and visualized using differential interference  
 4 contrast and fluorescence imaging. (A) Microcolonies of yeast at two different timepoints. (B) Histogram of the

1 approximate cell cycle stages of cell death for different mutants (number of analyzed dead cells – CFT1 – 24; GLE1- 27;  
2 FOL3 – 34; MSL5 - 32. (C) Time lapse images of a mother dying with a small bud for a mutant with *CFT1* knockdown  
3 (See video 1). (D) Time-lapse images of a mother-daughter pair of cells which die during cytokinesis for the mutant with  
4 *MSL5* knockdown (See video 2 and video 3). All time lapse experiments were performed in two independent runs for  
5 each strain, with no less than 4 chambers, i.e. microcolonies, analyzed for each strain during a run. A control strain was  
6 also included into each run.

## 7 **Phloxine phenotypes are strongly associated with indications of membrane and cell wall** 8 **dysfunction**

9 Why would bud generation and cytokinesis be vulnerable stages of the life cycle? We hypothesized  
10 that during these stages, the budding yeast cell-pair (mother and daughter) needs to rapidly and  
11 precisely remodel and expand both the plasma membrane, as well as the cell wall. In order to test  
12 whether impairments in these organelles might be common among phloxine-positive mutants, we  
13 tested them and a control subset of phloxine negative mutants for sensitivity to growth on SDS and  
14 ethanol (associated with effects on both the plasma membrane and lipid metabolism) (34–36) as  
15 well as to Calcofluor white (CFW), which is more specific to the cell wall due to its interaction with  
16 chitin and other cell wall carbohydrates and Congo Red (which interacts with  $\beta$ -1,3-d-glucan (37)).  
17 We observed that for a set of phloxine B positive mutants with reduced abundance of essential  
18 proteins, ~25, 45 and 25% of the tested mutants were sensitive to SDS, ethanol and CFW  
19 respectively (Figure 5 and Figure S3), while a set of non-phloxine staining mutants from the same  
20 collection exhibited almost no sensitive mutants. Notably, Congo Red showed no dramatic  
21 difference between the number of sensitive mutants between the phloxine-positive and -negative  
22 sets (Figure 5), which suggests that the difference in sensitivity of phloxine- and non-phloxine  
23 strains is not simply due to non-specific sensitivity of the phloxine mutants. Overall, this suggests  
24 that the phloxine phenotype (and probably the associated cell death) is related to some functional  
25 impairment of the cell membrane and/or cell wall.

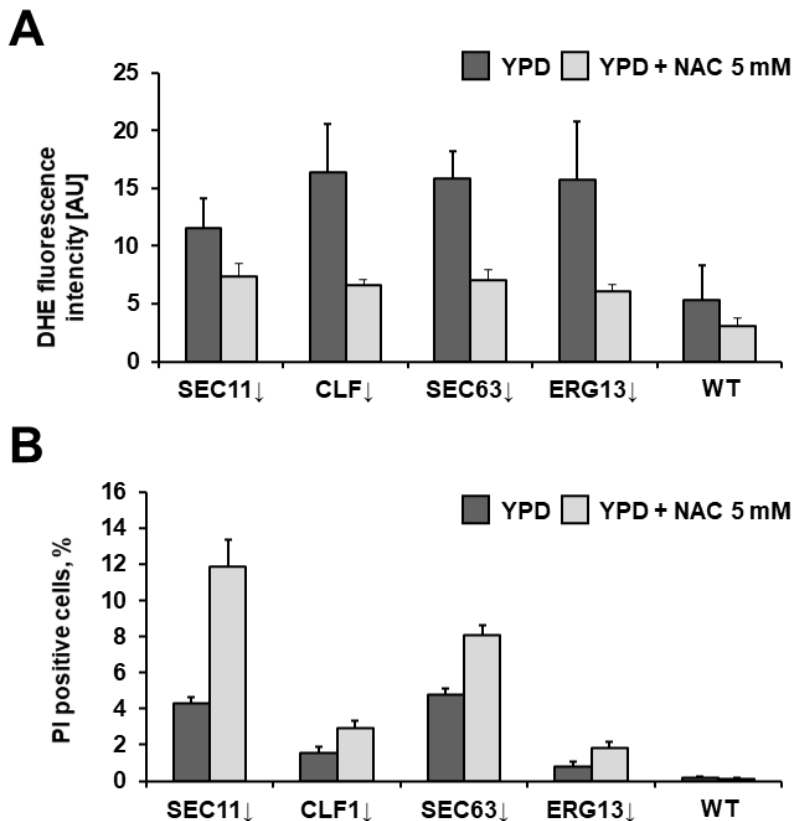

1

2 **Figure 5. Phloxine B positive mutants with reduced abundance of essential proteins are sensitive to**  
3 **membrane/cell wall stress.** (A) Determination of stress sensitivity of select Phloxine-positive mutants (n=76) (B)  
4 Phloxine-positive mutants show high incidence of sensitivity to ethanol, SDS, Calcofluor white and Congo Red as  
5 compared to a control set of mutants from the same mutant collection (C) Venn diagram of the stressor assays with the  
6 number of sensitive mutants in each sector.

## 7 **Identification of universal features of phloxine-positive mutants and mitigation of death** 8 **caused by different mutations**

9 A wide range of literature on cell death in response to various stimuli in yeast is available (in  
10 preparation) and a common feature of death is the generation and causative role of reactive oxygen  
11 species (ROS) in death. Lipid peroxidation in the membrane might also explain the commonality of  
12 membrane impairment in various mutants. Thus, to see whether ROS played a role in the cell death  
13 observed in our study, we used the ROS-sensitive stain dihydroethidium, which revealed increased  
14 levels of ROS in a subset of tested mutants (Figure 6A and Figure S4). However, these mutants did  
15 not show lowered chance of death in response to the supplementation N-acetyl cysteine.

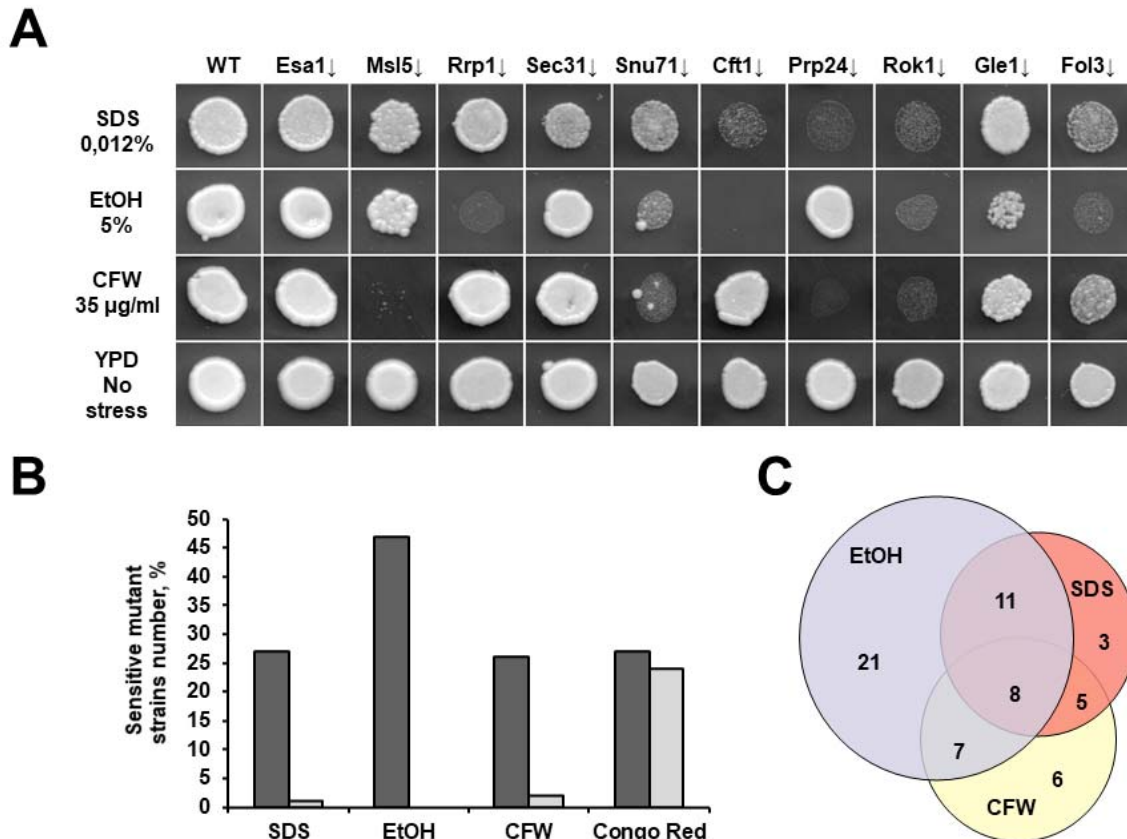

1

2 **Figure 6. Cell death of phloxine B positive mutants with chronic oxidative stress is not prevented by N-acetyl**  
 3 **cysteine (NAC).** (A) A subset of phloxine-staining strains exhibit increased staining by DHE in living cells. This  
 4 staining is reduced by NAC treatment. (B) Treatment with NAC does not reduce cell death rate in the strains exhibiting  
 5 increased DHE fluorescence in living (PI-negative) cells.

6 After that, we tested a range of other treatments that might have mitigating effects on cell death.  
 7 This was done by plating our selected mutants onto YPD with phloxine B supplemented by various  
 8 compounds (Figure 7A). Some of the tested treatments indeed mitigated cell death but only in a  
 9 limited number of mutants and this data might be useful for a deeper understanding of the cell death  
 10 mechanisms in future work (Figure S5). However, two treatments did have a strong mitigating effect  
 11 on nearly all of the mutants – these were the use of potassium acetate as a carbon source, and the  
 12 buffering of medium pH to 7. Because cultivation in potassium acetate increases the external pH and  
 13 other non-fermentable carbon sources (ethanol, glycerol) did not mitigate the phloxine phenotype  
 14 (data not shown), we concluded that the effect of potassium acetate and pH buffering were one and  
 15 the same, and were due to the increased external pH. Unlike all of the other tested treatments, whose  
 16 effects were limited to ~30% of the mutants or less, increased external pH reduced the phloxine



1 phenotype in most of the tested mutant colonies (Figure 7A, Figure S5). Since our testing method  
2 was based on the phloxine staining assay at a different pH, we also verified our results by testing  
3 cells grown at buffered pH without phloxine B, but then washed the cells (to control for the effect of  
4 external pH on the staining) and stained with PI (Figure 7B).

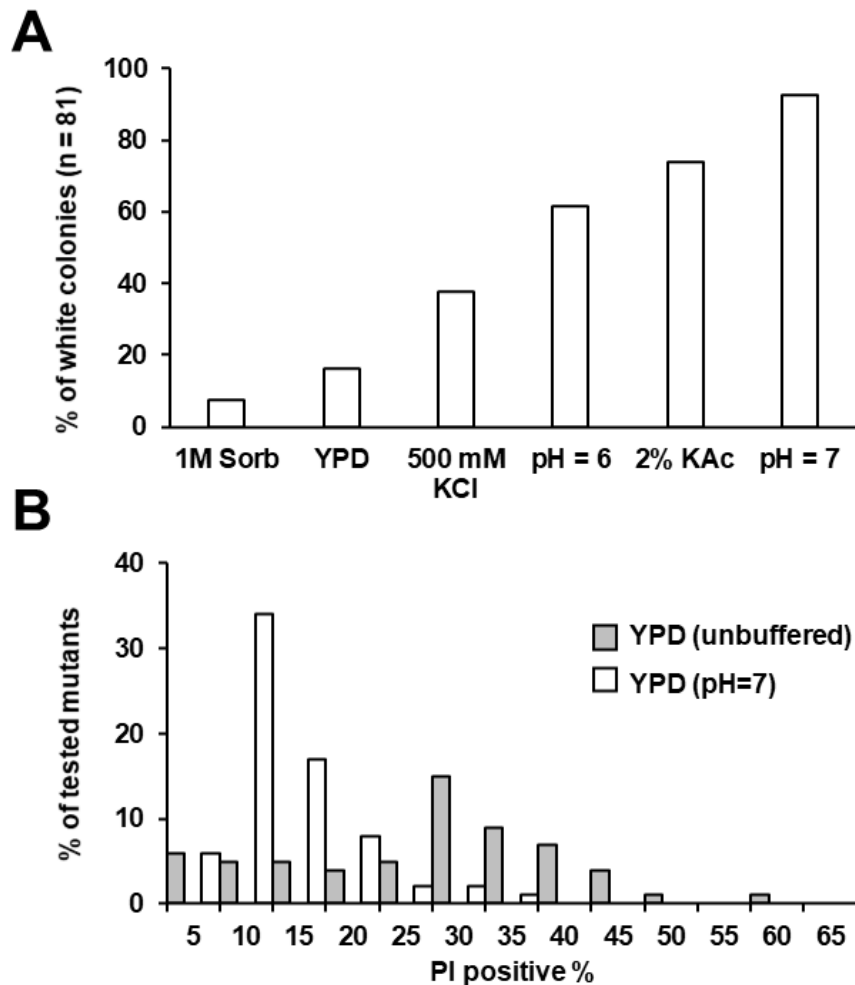

5

6 **Figure 7. Various treatments reduce phloxine staining in specific mutants, with external pH stabilization having a**  
7 **near-universal effect.** (A) 81 mutants from plate I, most exhibiting phloxine staining were plated onto YPD medium  
8 containing phloxine B supplemented with the noted component (except for 2% KAc, in which 2% potassium acetate was  
9 used as a carbon source instead of glucose). The graph denotes the share of tested mutants with a non-phloxine staining  
10 phenotype. (B) The same mutants (see A) and Figure S5) were grown in normal YPD or YPD buffered to pH=7. They  
11 were subsequently stained with PI and the % of PI-staining cells was measured by flow cytometry.

1 Thus, our results show that increased pH has a near-universal mitigating effect on the occurrence of  
2 rapid division associated necrotic death. Why could this be the case? We hypothesized that  
3 breaching of the cell membrane might foremostly be deadly due to cytoplasmic acidification. If this  
4 was true, then at lower pH, membrane permeabilization should be irreversible, as observed above,  
5 while at higher pH, where no acidification occurs during rupture, the membrane damage could be  
6 repaired, and manifest as a transient permeabilization event. Using microfluidics, we tested this  
7 hypothesis, and although we did observe reductions in the numbers of dead cells, as expected, we  
8 did not observe any transient permeabilization events. Another possibility, that should be tested  
9 further, is that the necrosis is dependent on membrane polarization effects involving protons, which  
10 can be mitigated by external pH buffering.

11

## 12 **Discussion**

13 In this study, we performed the first systematic identification of both non-essential and essential  
14 genes whose perturbation increases the rate of necrotic cell death involving membrane  
15 permeabilization in dividing *S. cerevisiae*. Thus, while the overall populations of the identified  
16 mutations exhibited an increased chance of cell death, most cells were capable of multiple divisions.  
17 We considered a possibility that, for downregulated essential genes, this stochastic effect may be  
18 caused by the unequal downregulation of protein levels in different cells of the colony; however, the  
19 same effects were seen for the gene deletion mutants. Thus, while stochastic cell death might be due  
20 to the heterogenous expression of target genes, but should also be related to some other forms of cell  
21 to cell variation or probabilistic events.

22 Our results demonstrate that perturbation of numerous cellular systems may result in an increased  
23 chance of necrotic cell death. The identified genes and their enrichment patterns closely follow the  
24 enrichment exhibited by essential genes from the DAMP collection overall (Figure 2C), even though  
25 a third of the genes identified in this work were non-essential. However, some categories that are  
26 abundant among essential genes are absent among the mutants we identified. For example,  
27 according to the SAFE analysis, essential genes in the DAMP collection are enriched in the “protein  
28 turnover” category, which was not detected in our data (Figure 2C). This could imply that  
29 impairment of genes in this category would not result in necrotic death or that this impairment needs  
30 to be more severe than what is achievable by the used type of downregulation (24).

1 Since our screen revealed the overall enrichment of genes implicated in cell cycle, cytoskeletal  
2 functions, and organelle localization (Figure 2A), and we observed death during the small bud stage  
3 and shortly after cytokinesis (Figure 5 and Movies 1 and 2), we hypothesize that perturbations in  
4 various unrelated processes can affect the ability of the cell to repair or generate the cell wall or  
5 plasma membrane during bud formation and/or cytokinesis. Although this was not detected as a  
6 statistically significant enrichment, 10 out of the identified 126 genes are involved in lipid  
7 metabolism, which is a key process for membrane synthesis and remodeling, with 6 more being  
8 reported to be sensitive to ethanol (38), a phenotype associated with impaired plasma membrane  
9 properties (39). Notably, changes in lipid synthesis have been reported to occur during the cell cycle  
10 in yeast (40) and in mammalian cells (41). We were also able to obtain additional support for  
11 impairment of the membrane and cell wall via detection of specific sensitivities to membrane- and  
12 cell-wall disrupting compounds. On the other hand, sorbitol, which often reduces the toxicity of cell-  
13 wall perturbing compounds, did not show a mitigating effect on cell death in most mutants. This  
14 suggests that perturbation of the cell wall is not the direct cause of cell death. However, the  
15 commonality of CFW sensitivity among phloxine mutants suggests that some functions that involve  
16 chitin might be involved. This is also highlighted by the observations that stochastic necrosis is  
17 associated with cytokinesis, which involves deposition of reparative chitin at the area of bud/birth  
18 scar formation.

19 Our ability to differentiate between spatial patterns of cell death in colonies allowed us to observe  
20 differences between cell death caused by distinct genetic perturbations. Mutants prone to death on  
21 the colony edges exhibited enrichment of genes belonging to the Mitosis and Cell  
22 polarity/morphogenesis categories. This suggests that the cells located on the bottom and edge of the  
23 colony, and thus experiencing the highest availability of nutrients and exhibiting rapid division (17,  
24 42) are more prone to death in response to the impairment of genes involved in cell division.

25 Mutants prone to homogenous death throughout the colony exhibited enrichment in genes belonging  
26 to the tRNA wobble modification cluster, which was not observed for other groups of phloxine B-  
27 staining mutants. Interestingly, it was also enriched in the genes at the intersection of Mitosis and  
28 DNA-repair and replication clusters. This suggests that some aspects of DNA repair might be  
29 important for survival of both rapidly dividing cells on the outside of the colony, as well as slowly  
30 dividing or non-dividing cells in the colony center.

31 Mutants prone to death at the center of the colony showed enrichment in genes related to Vesicle  
32 transport and Glycosylation/Protein Folding/Cell wall categories, suggesting that damage to these

1 machineries is especially relevant to starving and/or respiring cells known to inhabit the deeper  
2 regions of colonies (42). Interestingly, this pattern of cell death has previously been reported in yeast  
3 colonies growing on non-fermentable carbon sources for prolonged periods of time (16). Overall,  
4 different patterns of cell death in the colonies demonstrate that dividing and non-dividing cells, or  
5 cells with different physiology might have very distinct sensitivities to diverse death stimuli, i.e. it  
6 might be possible that cells at the edge of a colony might be physically or chemically shielded by  
7 the cells in direct contact with the growth medium. Such phenomena have been reported before,  
8 including nutrient sharing between dying cells on the inside of a colony and live cells on the edge  
9 (ref palkova) and the protective role of dead cells against the effects of polyene antifungals (ref  
10 knorre)

11 Identification of mutants with an increased probability of cell death provided us with an opportunity  
12 to study dynamics of this novel type of cell death. One notable observation was that the death was  
13 most often rapid, as evidenced by the DON assay and the microfluidics data (Figure 3 and 5 and  
14 videos). This is in contrast to the observations of a relatively slow onset of necrosis in senescent  
15 cells obtained during replicative aging (43, 44). Also, this is unlike the case for hydrogen peroxide  
16 stress, which, at lower concentrations, induces cell death via processes that do not involve rapid  
17 membrane permeabilization, and causes necrosis at higher concentrations (45). Because we were not  
18 able to observe any abnormal cellular features or division arrest prior to cell death, we assume that  
19 the death is most likely primary necrosis that is the consequence of a stochastic damaging event.  
20 This challenges the common view of necrosis being mainly a feature of severe stress, as opposed to  
21 apoptotic death, which occurs during milder perturbations.

22 To sum up, our work is the first to identify genetic mutations which increase the chance of cell death  
23 in dividing cells, and that most likely, many of these mutations cause cell death associated with the  
24 process of cell division. They also demonstrate that seemingly functionally unrelated mutations  
25 cause cell death that can be mitigated, via an unknown mechanism, by stabilizing external pH near  
26 neutral level, and that mutants with this type of cell death often exhibit phenotypes associated with  
27 perturbed properties of the plasma membrane and/or cell wall. This suggests that different  
28 impairments to the complex architecture of the cell seem to have a universal downstream effect on  
29 some stochastically-dangerous processes, in this case –possibly the maintenance of optimal plasma  
30 membrane or cell wall condition during division.

31 We also provide a set of new methods to study cell death: high-throughput screening and  
32 microfluidics based on phloxine B staining, which can detect increased rates of cell death under

1 various conditions and distinguish different types of dead cell distribution in colonies, and the DON  
2 assay to detect rapid necrosis in young cells. Finally, our work identifies a large set of mutants that  
3 exhibit stochastic necrosis and may be characterized in greater detail in future studies, thereby  
4 leading to a better understanding of specific differences in the modes of cell death caused by  
5 particular genetic perturbations.

6

## 7 **Materials and Methods**

### 8 **Yeast strains**

9 Strains used in this work were derivatives of the BY4741 strain (*MATa his3-D1 leu2-D0 lys2-D0*  
10 *ura3-D0*), obtained in the studies by (2, 24).

### 11 **Screening of genome-wide mutant collections**

12 Strains from the tested collection were refreshed on YPD medium and then pin-spotted onto YPD  
13 with phloxine B (30  $\mu$ M) (Acros Organics, Cat # 189470250) using 384-pin replicators with long  
14 pins (Singer, UK). The colonies were grown for 48 hours and then scanned using a Epson Perfection  
15 V550 Photo flatbed scanner at 2000 dpi. For optimal viewing of phloxine B staining phenotype, FIJI  
16 (46) was used to extract green channel images from the raw RGB, thus providing the highest  
17 contrast in terms of phloxine staining. Each library plate was tested at least twice and strains that did  
18 not show reproducible results were not taken up for further analysis.

### 19 **Gene enrichment analysis and SAFE**

20 Gene enrichment analysis was performed using The GO Term Finder (Version 0.86) which can be  
21 found at <https://www.yeastgenome.org/goTermFinder>. Proportional Venn diagrams were  
22 constructed using BioVenn (47). SAFE analysis was done using tools described in (25) for separate  
23 lists of genes identified as having different phloxine B staining patterns, and then combined onto a  
24 single map.

25

### 26 **Flow cytometric methods**

27 Flow cytometry was performed in 96-well plates using a Guava EasyCyte 8HT flow cytometry  
28 system (Millipore, USA) equipped with a 488 nm laser and a Cytoflex S equipped with a 405, 488  
29 and 561 nm laser. Where applicable, cell fluorescence was measured in the green (525/30 nm) (for

1 FAM fluorescence detection in the DON method and Sytox green fluorescence) and red (690/50  
2 nm) channel (for PI and DHE fluorescence detection). For all experiments except those with ROS  
3 levels assayed by DHE, prior to analysis, cells were stained with PI (2 µg/ml) for 1 hour in distilled  
4 water. For detection of dead cells in experiments using DHE, Sytox Green was used.

#### 5 **Determination of dead cell numbers in liquid cultures**

6 Stationary liquid cultures were obtained by growing cells in 96-well plates with shaking at 30°C,  
7 stained with PI as noted above and analyzed using flow cytometry.

#### 8 **Determination of differential death in yeast colony regions**

9 Colonies of yeast grown on YPD medium for 48 hours were used for manual collection of cells from  
10 the outer edge and center of a colony using a sterilized wire loop. These cells were suspended in  
11 distilled water and then stained and analyzed as noted above.

#### 12 **Death of Newborns Assay**

13 Stationary cultures of yeast cells were grown in 96-well plates, then were diluted by a factor of 50  
14 with fresh YPD. After allowing sufficient time to divide 2-3 times, these cells were stained using  
15 FAM-NHS (Lumiprobe, Russia) to label the cell wall green. Cells from overnight cultures that were  
16 diluted 50-fold in fresh YPD and allowed to regrow for 5 hours were spun down in plates, washed  
17 twice with distilled H<sub>2</sub>O, spun down again and the supernatant was removed. FAM-NHS was added  
18 to each well (1 mM concentration) in a volume of 30 µl in 10 mM PBS (pH = 7.5). After 10 minutes  
19 of vigorous shaking in a plate covered with aluminum foil, the cells were washed 3 times with 120  
20 µl of distilled water per each well. The obtained cells were then split into aliquots, one of which was  
21 kept for analysis as the zero time point, while the other was inoculated into YPD and allowed to  
22 accomplish a few divisions before flow cytometric analysis. The unlabeled cells were considered to  
23 be the youngest, because they were the ones that appeared after the staining procedure.

#### 24 **Microfluidic-based real-time microscopy**

25 Live-cell real-time microscopy was performed in a custom-made microfluidic device made of  
26 polydimethylsiloxane and a glass cover-slip that allows trapping of cells in a dedicated region of  
27 interest, limiting colony growth in the XY-plane. Constant medium flow at 20 µl/min was applied,  
28 enabling imaging of colony growth over several generations. Cells were cultured in YPD medium  
29 containing 300 nM Phloxine B. A Nikon Eclipse Ti-E with SPECTRA X light engine illumination  
30 and an Andor iXon Ultra 888 camera was used for epifluorescence microscopy. A plan-apo λ

1 100x/1.4Na Ph3 oil immersion objective was used to take phase-contrast and fluorescence images  
2 with a 3-minute frame rate. For automated focusing, the built-in Nikon perfect focus system was  
3 used during the experiment. Phloxine B fluorescence was imaged by exposure for 200 ms,  
4 illuminating with the SPECTRA X light engine at 556 nm and about 10 mW power. Identical  
5 settings were used for each of the experiments. Temperature control was achieved by setting both a  
6 custom made heatable insertion and an objective heater to 30°C.

## 7 **Detection of phloxine B staining under various conditions and testing of mutant sensitivity to** 8 **various compounds**

9 A subset of the identified phloxine positive mutants (Figure S4 and Dataset S6) as well as the  
10 control wild type strains were plated onto YPD medium containing phloxine B or the same medium  
11 supplemented with various compounds (1M Sorbitol, pH buffers). For sensitivity testing, we first  
12 determined the maximal concentration at which the wild-type strain showed robust growth on YPD  
13 medium supplemented with stressors (SDS, Ethanol, CFW, Congo Red), and then plated the subsets  
14 of phloxine positive and negative mutants (Figure S3 and Dataset S4) onto plates with these  
15 identified concentrations. Phloxine phenotype and growth sensitivity was scored manually. Each  
16 experiment was performed at least twice.

## 17 **Acknowledgements**

18 This project was partially funded by a grant from the President of the Russian Federation for Young  
19 Scientists MK-3323.2019.4 (initial screening of the deletion collections, DON method and  
20 microfluidics) and the Russian Science Foundation grant # 21-74-10115 (identifying conditions that  
21 prevent cell death, study of sensitivity of phloxine mutants, study of ROS-related effects) and the  
22 Ministry of Science and Higher Education of the Russian Federation (base funding).

23

## 24 **Author contributions**

25 AIA conceived and performed the experiments, analyzed data, drafted the manuscript, contributed  
26 funding and equipment, EVG performed experiments, analyzed data and created figures, OVM  
27 performed experiments, AVN analyzed data and created figures, IVK performed experiments and  
28 aided in data analysis, RS provided equipment and analyzed data, ESS performed experiments and  
29 provided equipment, SED edited the manuscript and analyzed data, VNG conceived the study,  
30 analyzed the data and edited the manuscript.

## 1 **References**

- 2 1. G. Liu, *et al.*, Gene Essentiality Is a Quantitative Property Linked to Cellular Evolvability.  
3 *Cell* **163** (2015).
- 4 2. G. Giaever, *et al.*, Functional profiling of the *Saccharomyces cerevisiae* genome. *Nature* **418**  
5 (2002).
- 6 3. K. Kobayashi, *et al.*, Essential *Bacillus subtilis* genes. *Proc. Natl. Acad. Sci. U. S. A.* **100**  
7 (2003).
- 8 4. T. Wang, *et al.*, Identification and characterization of essential genes in the human genome.  
9 *Science* (80-. ). **350**, 1096–1101 (2015).
- 10 5. J. K. White, *et al.*, XGenome-wide generation and systematic phenotyping of knockout mice  
11 reveals new roles for many genes. *Cell* **154** (2013).
- 12 6. D. E. Gottschling, T. Nyström, The Upsides and Downsides of Organelle Interconnectivity.  
13 *Cell* **169**, 24–34 (2017).
- 14 7. L. Galluzzi, *et al.*, Molecular mechanisms of cell death: Recommendations of the  
15 Nomenclature Committee on Cell Death 2018. *Cell Death Differ.* **25** (2018).
- 16 8. X. Liu, *et al.*, There are only four basic modes of cell death, although there are many ad-hoc  
17 variants adapted to different situations. *Cell Biosci.* **8** (2018).
- 18 9. B. Sampaio-Marques, W. C. Burhans, P. Ludovico, Yeast at the Forefront of Research on  
19 Ageing and Age-Related Diseases. *Prog. Mol. Subcell. Biol.* **58** (2019).
- 20 10. C. He, C. Zhou, B. K. Kennedy, The yeast replicative aging model. *Biochim. Biophys. Acta -*  
21 *Mol. Basis Dis.* **1864** (2018).
- 22 11. D. Carmona-Gutierrez, *et al.*, Guidelines and recommendations on yeast cell death  
23 nomenclature. *Microb. Cell* **5** (2018).
- 24 12. T. Eisenberg, D. Carmona-Gutierrez, S. Büttner, N. Tavernarakis, F. Madeo, Necrosis in  
25 yeast. *Apoptosis* **15**, 257–268 (2010).
- 26 13. S. A. Kochmak, D. A. Knorre, S. S. Sokolov, F. F. Severin, Physiological scenarios of  
27 programmed loss of mitochondrial DNA function and death of yeast. *Biochem.* **76** (2011).



- 1 14. C. Mazzoni, C. Falcone, Caspase-dependent apoptosis in yeast. *Biochim. Biophys. Acta - Mol.*  
2 *Cell Res.* **1783** (2008).
- 3 15. M. Kuthan, *et al.*, Domestication of wild *Saccharomyces cerevisiae* is accompanied by  
4 changes in gene expression and colony morphology. *Mol. Microbiol.* **47** (2003).
- 5 16. L. Váchová, Z. Palková, Physiological regulation of yeast cell death in multicellular colonies  
6 is triggered by ammonia. *J. Cell Biol.* **169**, 711–717 (2005).
- 7 17. A. Traven, *et al.*, Transcriptional Profiling of a Yeast Colony Provides New Insight into the  
8 Heterogeneity of Multicellular Fungal Communities. *PLoS One* **7** (2012).
- 9 18. M. Čáp, L. Štěpánek, K. Harant, L. Váchová, Z. Palková, Cell Differentiation within a Yeast  
10 Colony: Metabolic and Regulatory Parallels with a Tumor-Affected Organism. *Mol. Cell* **46**  
11 (2012).
- 12 19. K. Bisht, C. Ann Wakeman, Discovery and therapeutic targeting of differentiated biofilm  
13 subpopulations. *Front. Microbiol.* **10** (2019).
- 14 20. J. Kucsera, K. Yarita, K. Takeo, Simple detection method for distinguishing dead and living  
15 yeast colonies. *J. Microbiol. Methods* **41**, 19–21 (2000).
- 16 21. M. Kwolek-Mirek, R. Zadrag-Tecza, Comparison of methods used for assessing the viability  
17 and vitality of yeast cells. *FEMS Yeast Res.* **14** (2014).
- 18 22. S. Lie, P. Banks, C. Lawless, D. Lydall, J. Petersen, The contribution of non-essential  
19 *Schizosaccharomyces pombe* genes to fitness in response to altered nutrient supply and target  
20 of rapamycin activity. *Open Biol.* **8** (2018).
- 21 23. G. Giaever, C. Nislow, The Yeast Deletion Collection: A Decade of Functional Genomics.  
22 **197**, 451–465 (2014).
- 23 24. D. K. Breslow, *et al.*, A comprehensive strategy enabling high-resolution functional analysis  
24 of the yeast genome. *Nat. Methods* **5** (2008).
- 25 25. A. Baryshnikova, Systematic Functional Annotation and Visualization of Biological  
26 Networks. *Cell Syst.* **2** (2016).
- 27 26. M. Costanzo, *et al.*, A global genetic interaction network maps a wiring diagram of cellular  
28 function. *Science (80-. )*. **353**, aaf1420–aaf1420 (2016).

- 1 27. H. M. Davey, P. Hexley, Red but not dead? Membranes of stressed *Saccharomyces cerevisiae*  
2 are permeable to propidium iodide. *Environ. Microbiol.* **13** (2011).
- 3 28. S. Piccirillo, *et al.*, Cell differentiation and spatial organization in yeast colonies: Role of cell-  
4 wall integrity pathway. *Genetics* **201** (2015).
- 5 29. L. Shen, Y. Li, L. Jiang, X. Wang, Response of *Saccharomyces cerevisiae* to the stimulation  
6 of lipopolysaccharide. *PLoS One* **9** (2014).
- 7 30. N. Anthony, *et al.*, Ptychographic imaging of NaD1 induced yeast cell death. *Biomed. Opt.*  
8 *Express* **10** (2019).
- 9 31. T. Vicar, M. Raudenska, J. Gumulec, J. Balvan, The Quantitative-Phase Dynamics of  
10 Apoptosis and Lytic Cell Death. *Sci. Rep.* **10** (2020).
- 11 32. W. A. Linnemans, P. Boer, P. F. Elbers, Localization of acid phosphatase in *Saccharomyces*  
12 *cerevisiae*: a clue to cell wall formation. *J. Bacteriol.* **131**, 638–644 (1977).
- 13 33. J. L. Gay, M. Martin, An electron microscopic study of bud development in  
14 *Saccharomyces ludwigii* and *Saccharomyces cerevisiae*. *Arch. Mikrobiol.* **78** (1971).
- 15 34. Z. Chi, N. Arneborg, Relationship between lipid composition, frequency of ethanol-induced  
16 respiratory deficient mutants, and ethanol tolerance in *Saccharomyces cerevisiae*. *J. Appl.*  
17 *Microbiol.* **86**, 1047–1052 (1999).
- 18 35. K. M. You, C.-L. Rosenfield, D. C. Knipple, Ethanol Tolerance in the Yeast *Saccharomyces*  
19 *cerevisiae* Is Dependent on Cellular Oleic Acid Content. *Appl. Environ. Microbiol.* **69**, 1499–  
20 1503 (2003).
- 21 36. F. Zhao, *et al.*, Multiple cellular responses guarantee yeast survival in presence of the cell  
22 membrane/wall interfering agent sodium dodecyl sulfate. *Biochem. Biophys. Res. Commun.*  
23 **527**, 276–282 (2020).
- 24 37. M. C. Semedo, A. Karmali, L. Fonseca, A high throughput colorimetric assay of  $\beta$ -1,3-d-  
25 glucans by Congo red dye. *J. Microbiol. Methods* **109**, 140–148 (2015).
- 26 38. W. Qian, D. Ma, C. Xiao, Z. Wang, J. Zhang, The Genomic Landscape and Evolutionary  
27 Resolution of Antagonistic Pleiotropy in Yeast. *Cell Rep.* **2** (2012).
- 28 39. C. M. Henderson, D. E. Block, Examining the role of membrane lipid composition in

- 1           determining the ethanol tolerance of *saccharomyces cerevisiae*. *Appl. Environ. Microbiol.* **80**  
2           (2014).
- 3   40.   H. M. Blank, *et al.*, Abundances of transcripts, proteins, and metabolites in the cell cycle of  
4           budding yeast reveal coordinate control of lipid metabolism. *Mol. Biol. Cell* **31**, 1069–1084  
5           (2020).
- 6   41.   G. E. Atilla-Gokcumen, *et al.*, Dividing cells regulate their lipid composition and localization.  
7           *Cell* **156** (2014).
- 8   42.   Z. S. Marinkovic, *et al.*, A microfluidic device for inferring metabolic landscapes in yeast  
9           monolayer colonies. *Elife* **8** (2019).
- 10 43.   M. Molon, R. Zadrag-Tecza, T. Bilinski, The longevity in the yeast *Saccharomyces*  
11           cerevisiae: A comparison of two approaches for assessment the lifespan. *Biochem. Biophys.*  
12           *Res. Commun.* **460** (2015).
- 13 44.   M. M. Crane, *et al.*, Dna damage checkpoint activation impairs chromatin homeostasis and  
14           promotes mitotic catastrophe during aging. *Elife* **8** (2019).
- 15 45.   F. Madeo, *et al.*, Oxygen stress: A regulator of apoptosis in yeast. *J. Cell Biol.* **145** (1999).
- 16 46.   J. Schindelin, *et al.*, Fiji: An open-source platform for biological-image analysis. *Nat.*  
17           *Methods* **9** (2012).
- 18 47.   T. Hulsen, J. de Vlieg, W. Alkema, BioVenn - A web application for the comparison and  
19           visualization of biological lists using area-proportional Venn diagrams. *BMC Genomics* **9**  
20           (2008).

21
