1 **Systematic identification of yeast mutants with increased rates of cell death reveals rapid**  
2 **stochastic necrosis associated with cell division**

3

4 Alexander I. Alexandrov<sup>1#\*</sup>, Erika V. Grosfeld<sup>2,1#</sup>, Olga V. Mitkevich<sup>1</sup>, Victoria A. Bidyuk<sup>1</sup>, Arina  
5 V. Nostaeva<sup>1,3</sup>, Igor V. Kukhtevich<sup>4</sup>, Robert Schneider<sup>4,5</sup>, Evgeniy S. Shilov<sup>6</sup>, Vitaliy V. Kushnirov<sup>1</sup>,  
6 Sergey E. Dmitriev<sup>7,8\*</sup>, Vadim N. Gladyshev<sup>9\*</sup>

7 <sup>1</sup>*Bach Institute of Biochemistry, Federal Research Center of Biotechnology of the RAS, Moscow,*  
8 *119071, Russia*

9 <sup>2</sup>*Moscow Institute of Physics and Technology (National Research University), Dolgoprudny, 141700*  
10 *Russia*

11 <sup>3</sup>*Higher School of Economics, Faculty of Computer Science, 109028, Moscow, Russia*

12 <sup>4</sup>*Institute of Functional Epigenetics, Helmholtz Zentrum München, Neuherberg D-85764, Germany*

13 <sup>5</sup>*German Center for Diabetes Research, Neuherberg D-85764, Germany*

14 <sup>6</sup>*Biological Faculty, Lomonosov Moscow State University, Moscow, 119992 Russia*

15 <sup>7</sup>*Belozersky Institute of Physico-Chemical Biology, Lomonosov Moscow State University, Moscow,*  
16 *119234, Russia*

17 <sup>8</sup>*Faculty of Bioengineering and Bioinformatics, Lomonosov Moscow State University, Moscow,*  
18 *119234 Russia*

19 <sup>9</sup>*Division of Genetics, Department of Medicine, Brigham and Women's Hospital and Harvard*  
20 *Medical School, Boston MA 02115, USA*

21 #These authors contributed equally to this work

22 \* Corresponding author

23 Correspondence to: [vgladyshev@rics.bwh.harvard.edu](mailto:vgladyshev@rics.bwh.harvard.edu) (V.N.G.)

24 Correspondence may also be addressed to: [alexvir@inbi.ras.ru](mailto:alexvir@inbi.ras.ru) (A.I.A) and  
25 [sergey.dmitriev@belozersky.msu.ru](mailto:sergey.dmitriev@belozersky.msu.ru) (S.E.D.)

26 Running title: (50 characters) Genome-wide screening for necrotic cell death

27

1 ***Abstract***

2

3 Cell death plays a major role in development, pathology and aging and can be triggered by various  
4 types of acute stimuli which arrest cell growth. However, little is known about chronic cell death in  
5 the context of continuing cell division. Here, we performed a genome-wide search for mutants with  
6 this type of death in dividing baker's yeast by assaying staining with phloxine B, which accumulates  
7 in dead cells. This screen yielded 83 essential and 43 non-essential gene mutants. Three contrasting  
8 types of spatial distribution of dead cells in colonies were observed, which corresponded to gene  
9 ontology enrichment for (i) DNA replication and repair, RNA processing, chromatin organization,  
10 and nuclear transport; (ii) mitosis and cytokinesis; and (iii) vesicular transport and glycosylation/cell  
11 wall homeostasis. To study dynamics of cell death in these mutants, we developed methods for  
12 analyzing the death of newborn cells (DON) and cell death in real time using microfluidics-based  
13 microscopy. These revealed rapid stochastic necrosis during bud generation or cytokinesis without  
14 prior division arrest. Increased death during division was associated with common sensitivity to  
15 plasma membrane and cell-wall perturbing agents, and could be mitigated by neutral pH stabilization  
16 of the medium. This suggests a common downstream type of cell death caused by a wide range of  
17 genetic perturbations.

18

## 1 **Introduction**

2 The cell is a complex agglomerate of components and systems that act in concert to achieve  
3 sustainable replication of either itself or, for a multicellular organism, of the organism's germ line.  
4 Cellular machinery is largely made up of proteins, some of which are more dispensable than others  
5 (1). The absence of indispensable (essential) proteins makes cells inviable, precludes them from  
6 replicating or, at the organismal level, blocks development. Identification of essential proteins and  
7 their characterization has yielded important insights into the functions of different cellular systems  
8 (2–5). However, the indispensability of a certain protein is a complex phenomenon, which may have  
9 several causes. At the cellular level, the lack of some essential proteins may create insurmountable  
10 problems for cell division, while deficiency of others may trigger cell death, i.e. spontaneous or  
11 programmed catastrophic failure of the cellular machinery. Importantly, cell death is most likely an  
12 integrative process that is realized via the complex interactions between different cellular systems (6).  
13 So, systematic understanding of triggers of cell death at the level of individual genes as well as gene  
14 interaction networks that mediate death can be very informative for a systems-level understanding of  
15 the cell.

16 Cell death is known to proceed via distinct mechanisms. Specifically, studies performed with  
17 mammalian cells have revealed more than 30 types of cell death (7), although they can be grouped  
18 into several larger categories (8). Even though many of the mechanisms involved in cell death in  
19 response to various pathologies and conditions have been established, specific and systematic  
20 understanding of the genes and systems whose perturbation can trigger necrotic death remains poorly  
21 understood. A recent systematic review on the subject of external treatments that can cause different  
22 types of cell death in yeast and other fungi (9) highlights that while numerous acute treatments are  
23 known to stop cell division and kill cells, little is known about whether and how cells die in conditions  
24 where division is not arrested.

25 The budding yeast *Saccharomyces cerevisiae* has been an immensely useful model in the analysis of  
26 lifespan and aging (10, 11), and also is an established model for the analysis of cell death (12–15).  
27 However, even in this simple and tractable model, there have been no systematic studies on genes  
28 whose perturbations can increase death rate. Consequently, there is also no understanding of the  
29 temporal dynamics of cell death during chronic or acute perturbation of different genes.

30 High-throughput testing of mutants for various phenotypes in microorganisms is very efficient, due  
31 to the ability of cells to grow in colonies on solid medium, which can be arranged in ordered and dense  
32 arrays on single plates. Colonies of yeast and other microbes are dense agglomerations of cells, which

1 might seem like simple lumps of cells, but they are actually quite complex structures. This is especially  
2 true for wild yeast isolates, but even the laboratory strains, which lose the ability to form colonies with  
3 visible morphological complexity (16), exhibit various aspects of cell differentiation when grown in  
4 a colony (17). A probable reason for this diversity is that the colonies create gradients of various  
5 conditions from the outside surface to the internal regions, which, in turn, affect the behavior of cells  
6 in each region. However, this diversity has not been probed in a systematic fashion, and only  
7 fragmentary data are currently available in yeast (17–19), while studies of this phenomenon in  
8 prokaryotes have been more active (20). Currently, there is almost no data on how the location of  
9 yeast cells in colonies may affect their susceptibility to various perturbations, although this may be  
10 highly relevant for the killing of various pathogenic fungi using antifungal drugs.

11 In this study, we identified genes, whose perturbation increases the rate of cell death accompanied by  
12 membrane permeabilization, i.e. necrotic cell death, in dividing cultures by using the nontoxic stain  
13 phloxine B (21–23). The identified mutants exhibited distinct spatial patterns of death in colonial  
14 multicellular structures. We further developed novel tools to characterize the temporal dynamics of  
15 cell death in the identified mutants. These methods allowed us to determine that, in many mutants  
16 exhibiting increased death rates, mother and daughter cells may rapidly die in a stochastic manner  
17 during budding and cytokinesis and that this type of death seems to be related to perturbations in the  
18 functioning of the cell wall and membrane. Surprisingly, this type of death could be mitigated by  
19 neutral pH stabilization of the medium. Our discovery of this novel mode of necrotic death showed  
20 that cell division is a highly sensitive period of development and suggests that this type of death may  
21 be a common consequence of the dysfunction of various genes and the respective proteins, making  
22 this finding highly relevant to our understanding of various pathological states.

23

## 24 **Results**

### 25 **Phloxine B staining of yeast colonies as a high-throughput method for detection of cell death**

26 In order to identify mutants with increased rates of cell death, we employed the yeast knock-out (24)  
27 and essential gene knock-down (DAMP) (25) collections. To identify colonies with increased  
28 numbers of dead cells we adapted the use of phloxine B (Figure 1A) (21, 22) for high-throughput  
29 screening. Phloxine B is a negatively charged dye that only enters cells with impaired membrane  
30 permeability, i.e. those that have experienced necrotic death. Thus, if a colony contains mostly live  
31 cells, phloxine B would not stain this colony. However, if a colony has live cells (all colonies have

1 live cells, otherwise they would not grow) as well as a substantial number of dead cells, these dead  
2 cells (Figure 1B) and therefore the colony would be stained in various shades of red. Plates containing  
3 phloxine B with yeast mutants were imaged after 2 days of growth (Supplemental archive 1), and the  
4 mutants exhibiting clear phloxine B staining were collected and replated onto new phloxine B plates,  
5 along with control strains, confirming the phenotype (Figure S1). To avoid population heterogeneity  
6 due to the emergence of suppressor mutants, all selected strains were streaked to single colonies with  
7 identical phenotypes, and further work was done on the progeny of single phloxine B positive colonies  
8 taken periodically from cryostorage. Despite this, while working with these phloxine-positive  
9 mutants, periodically strains stopped growing due to unknown reasons, thus in some of the tests  
10 presented further, the number of tested strains differs.

11 Overall, we identified a total of 126 mutants in both collections, with 83 originating from the  
12 collection of mutants with downregulated essential proteins (out of 879 strains), and 43 from the  
13 knockout collection (out of 5,117 strains) (Figure 1C, Dataset S1, Figure S1). Thus, essential genes  
14 were strongly overrepresented among the genes whose dysfunction increases the chance of cell death.

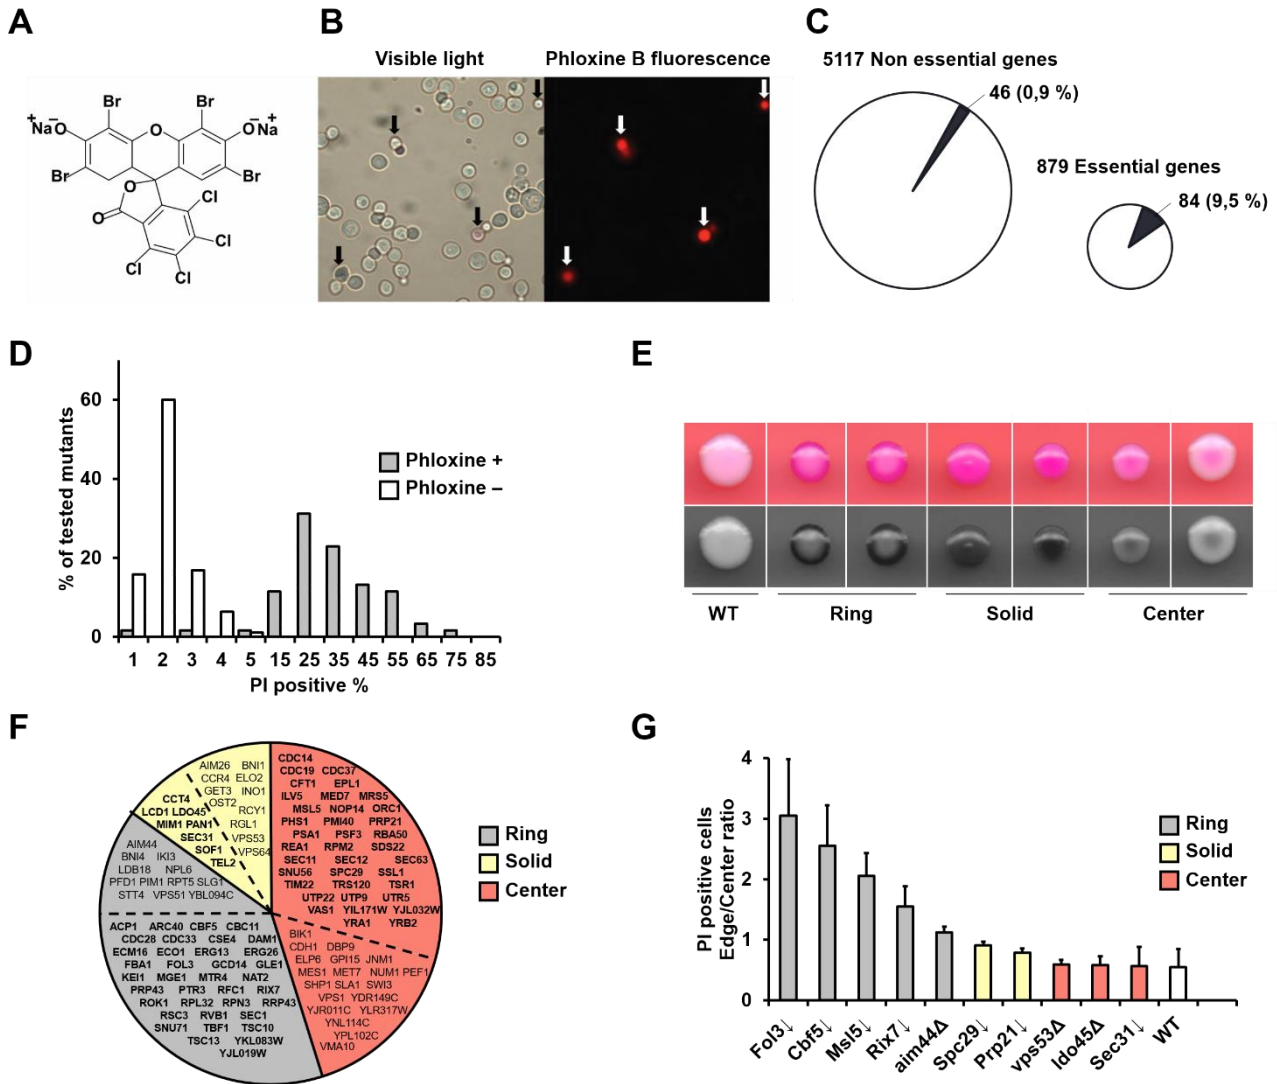

1

2 **Figure 1. Phloxine B staining of mutant colonies provides spatial information on the distribution of dead cells.** (A)  
 3 Structure of phloxine B. (B) Fluorescent microscopy of live and dead cells stained with phloxine B. Arrows indicate dead  
 4 cells. (C) Numbers of phloxine B positive mutants among the mutants with deletions of non-essential genes and  
 5 downregulation of essential genes. (D) Distribution of the percentage of PI positive cells, obtained by a flow cytometric  
 6 analysis of suspensions of yeast cells stained with PI. The number of phloxine B positive mutants and phloxine B  
 7 negative mutants and wild type strain was 61 and phloxine B  
 8 negative mutants and wild type strain was 95. Measurements were performed in stationary cultures at least 2 times for  
 9 each strain. (E) Colonies of the representative staining types grown for 48 hours on YPD containing phloxine B, depicted  
 10 under the colony images. Specific mutants are (from left to right) – wild type, and downregulation of *CDC33*, *CDC11*,  
 11 *SPC29*, *UTR5*, *SEC31*, and *RSC58* genes. Top panel – natural color, lower panel – green channel which provides maximal  
 12 contrast for viewing phloxine B staining. (F) Genes associated with increased phloxine B staining. Colored sectors depict  
 13 the phenotypic class (Ring, Solid, Center), regular font shows non-essential genes, and essential genes are shown in bold.  
 14 (G) Ratio of the percentage of PI positive cells in cell suspensions obtained from the edge and center of yeast colonies  
 grown for 48 hours on YPD medium. 3 colonies were analyzed for each strain, and error bars depict standard deviation.

15 To verify that phloxine B staining provides data comparable to the more commonly used methods of  
 16 detecting dead cells, we used propidium iodide (PI) staining, which stains nucleic acids in cells with

1 permeable membranes. For this, we tested 61 of our phloxine B positive mutants, as well as a panel  
2 of 90 random phloxine B negative mutants from the DAMP collection. We found that phloxine B  
3 negative mutants exhibited fewer than 4% PI positive cells, whereas more than 80% of the tested  
4 phloxine B positive strains contained more than 15% PI positive cells (Figure 1D). Thus, the use of  
5 phloxine B staining of colonies offers a qualitative, high-throughput assay that provides results in  
6 agreement with PI staining of *S. cerevisiae* liquid cultures.

7 We considered the possibility that increased staining could be related to an altered stain uptake or its  
8 removal by the yeast cells rather than due to cell death. To check this possibility, we tested whether  
9 phloxine B staining was dependent on the action of drug efflux pumps. Comparison of a wild-type  
10 strain and a mutant with deleted *PDR3* and *PDR5* genes, which are the main efflux pumps in yeast,  
11 showed that the latter exhibited slightly reduced, rather than increased, phloxine B staining compared  
12 to wild type (Figure S2).

### 13 **Phloxine B reveals spatial patterns of cell death in yeast colonies**

14 One observation that immediately attracted our attention during the screen was that phloxine B  
15 staining patterns differed between the colonies of different mutants (Figure 1E, Figure S1). A large  
16 number of strains exhibited a pattern of staining where only the border (edge) of the colony was  
17 stained, while the center was much lighter (hereafter called “Ring” mutants). Other mutants exhibited  
18 more or less homogenous staining (“Solid” mutants), while the third class of mutants exhibited  
19 staining mostly in the center of the colony (“Center” mutants), albeit mutants with a strong phenotype  
20 like this were rare. Overall, out of the 126 mutants, 51 possessed the Ring phenotype, 56 Solid, and  
21 19 Center phenotype (Figure 1F, Dataset S1).

22 In order to exclude phloxine B-specific effects, such as toxicity or diffusion gradients, colonies were  
23 grown on medium without phloxine B, after which cells were collected from the edge and center of  
24 the colonies and assayed for the percentage of cells stainable by PI. The ratio between these  
25 percentages represents the degree to which more dead cells are present on the outside of the colony as  
26 opposed to the center and were in excess of 1.5 for the Ring mutants, around 0.5 for the Center  
27 mutants, and close to 1 for the Solid mutants (Figure 1G). Colonies of the wild type strain had very  
28 few dead cells, and thus the results were highly variable; however, the ratio suggested that in wild  
29 type colonies, dead cells might be more numerous in the center. Overall, the data revealed that  
30 phloxine B staining offered a convenient qualitative test for determining the spatial distribution of  
31 dead cells in yeast colonies.



## 1 **Functional analysis of genes whose perturbation increases cell death**

2 Using a GO-term enrichment analysis of genes whose perturbation increases cell death, we observed  
3 enrichment of genes associated with cell division (including those involved in the cell cycle, as well  
4 as tubulin and actin cytoskeleton) and establishment of [component] localization in the cell (Figure  
5 2A). The cell cycle and cytoskeletal categories mostly overlapped; however, the localization category  
6 overlapped with the latter two only partially (Figure 2A). Genes belonging to these categories  
7 accounted for ~45% of the genes found to increase cell death.

8 We further employed the SAFE algorithm (26), which is a method of identifying functional  
9 enrichment of gene sets based on the similarity of experimentally mapped genetic interaction networks  
10 (27) rather than manually assigned gene annotations. SAFE revealed enrichment in interactions with  
11 genes involved in DNA replication & repair, mitosis & chromosome segregation, cell polarity and  
12 morphogenesis, transcription & chromatin organization categories, which agrees with the GO term  
13 analysis results, as well as other categories. Notably, enrichment patterns for different phloxine B  
14 staining types were distinct, with the Center phenotype forming a compact cluster in the regions  
15 corresponding to vesicle traffic, glycosylation & protein folding/targeting & cell wall biosynthesis;  
16 MVB sorting/pH-dependent signaling; cell polarity and morphogenesis, while the genes whose  
17 perturbation causes the Ring phenotype were mostly found in the regions corresponding to MVB  
18 sorting/pH-dependent signaling and mitosis & chromosome segregation. For the Solid phenotype,  
19 interacting genes clustered with a wider range of categories - tRNA wobble modification; mRNA  
20 processing; rRNA and ncRNA processing; mitosis & chromosome segregation, DNA replication &  
21 repair and transcription & chromatin organization. Overall, the SAFE distribution for mutants  
22 identified by phloxine B screening was similar to that of essential genes from the DAMP collection  
23 (Figure 2C, right panel), even though 1/3 of our dataset consisted of non-essential genes (Figure 2C,  
24 left panel). Notable differences included the absence of enrichment for the protein degradation  
25 category among the mutants exhibiting phloxine B staining, and the emergence of the tRNA wobble  
26 modification category, which was absent in the essential gene enrichment pattern.

27



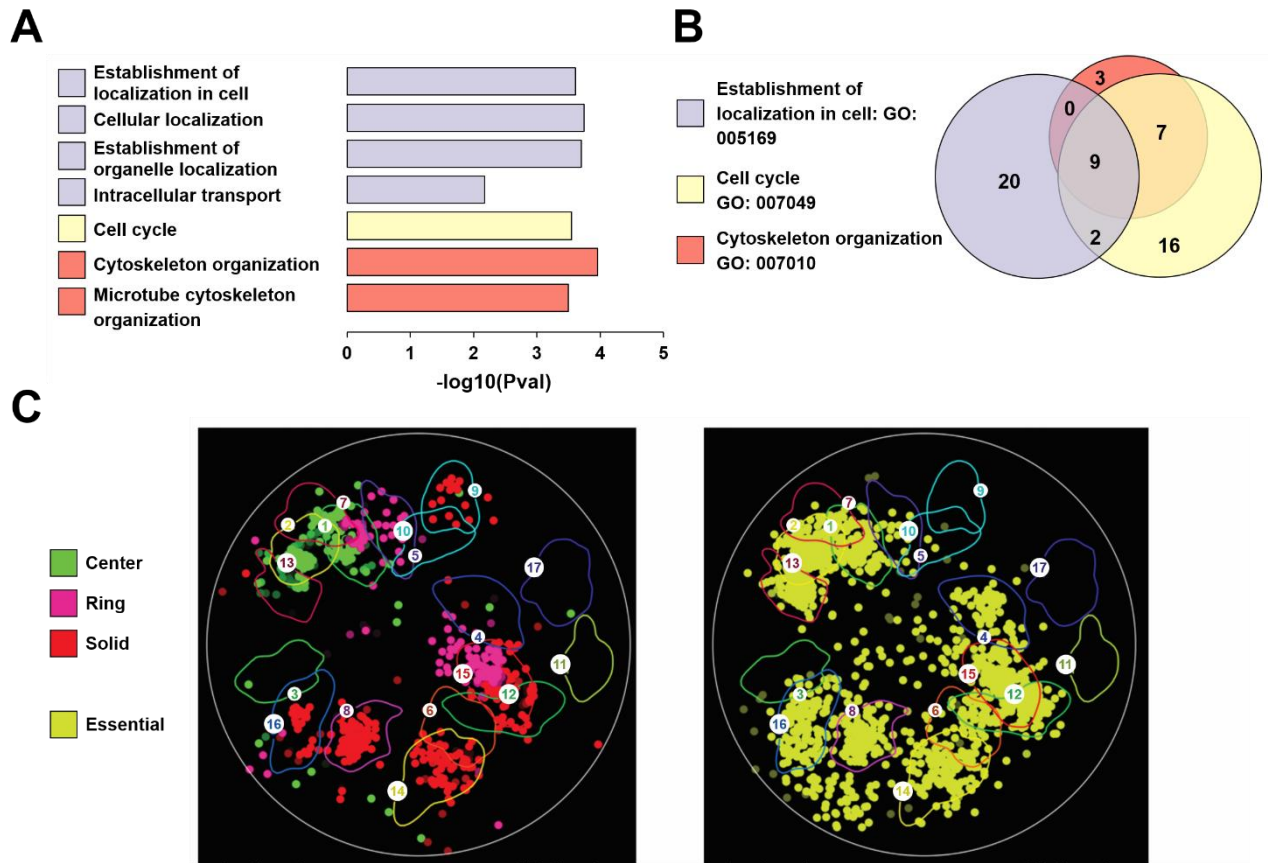

Cluster attribution: (1) Cell polarity & morphogenesis; (2) Glycosylation, protein folding/targeting, cell wall biosynthesis; (3) Ribosome biogenesis (4) Protein degradation; (5) Cytokinesis; (6) Nuclear-cytoplasmic transport; (7) MVB sorting & pH-dependent signaling; (8) mRNA processing; (9) tRNA wobble modification; (10) Peroxisome; (11) Metabolism & fatty acid biosynthesis; (12) DNA replication & repair; (13) Vesicle traffic; (14) Transcription & chromatin organization; (15) Mitosis & chromosome segregation (16) rRNA & ncRNA processing; (17) Respiration, oxidative phosphorylation, mitochondrial targeting.

1

2

3 **Figure 2. Enrichment analysis of genes identified by phloxine B staining.** (A) GO-term enrichment analysis. Bars with  
 4 the same color denote GO-terms which are nested into each other. (B) Venn diagram of the identified GO-term enrichment  
 5 with the number of genes in each sector. (C) SAFE-analysis of the identified genes presenting specific phloxine B staining  
 6 patterns with color coding (green – center, magenta – ring, red – solid) (left) and all essential genes from the DAMP  
 7 collection (yellow) (right). Spots indicate genes that represent nodes of the interaction network enriched for interactions  
 8 with the input list of genes. Spot brightness indicates p-value of enrichment.

9

## 10 Pervasive death of newborn cells

11 It is unclear whether the dead cells accumulating in colonies and liquid cultures resulted from cells  
 12 dying quickly after birth, or if cell death occurred after a prolonged period of division arrest. In order  
 13 to answer this question, we devised an assay to detect death of recently born daughter cells (Figure  
 14 3A). In brief, cells were labeled with a membrane-impermeant fluorophore that stains amino-groups  
 15 in the cell wall, and the cells were allowed to divide 1-2 times. This generated a population of

1 unstained replicatively young cells, whose chance of death can be determined by a flow-cytometric  
 2 analysis of PI staining (Figure 3B). We termed this method the DON assay (Death of Newborns).  
 3 DON supported a clear distinction between mutant and wild type strains and demonstrated that a  
 4 notable percentage of cells born experienced death during the first 1-2 divisions, wherein membrane  
 5 permeabilization occurred relatively quickly after appearance of these cells. We found that for ~95%  
 6 of our identified and tested mutants (n=77), young mutant cells were at least 3-fold more likely to die  
 7 compared to the situation in wild type cells (Figure 3C, Dataset S2). Aging cells also seemed to  
 8 experience death; however, interpreting the relative chance of cell death between young cells and aged  
 9 cells is difficult, because a portion of the dead stained cells originate from cells that were dead during  
 10 staining, i.e. the results are not easily interpretable without more time points. This study is currently  
 11 underway and will be published at a later time.

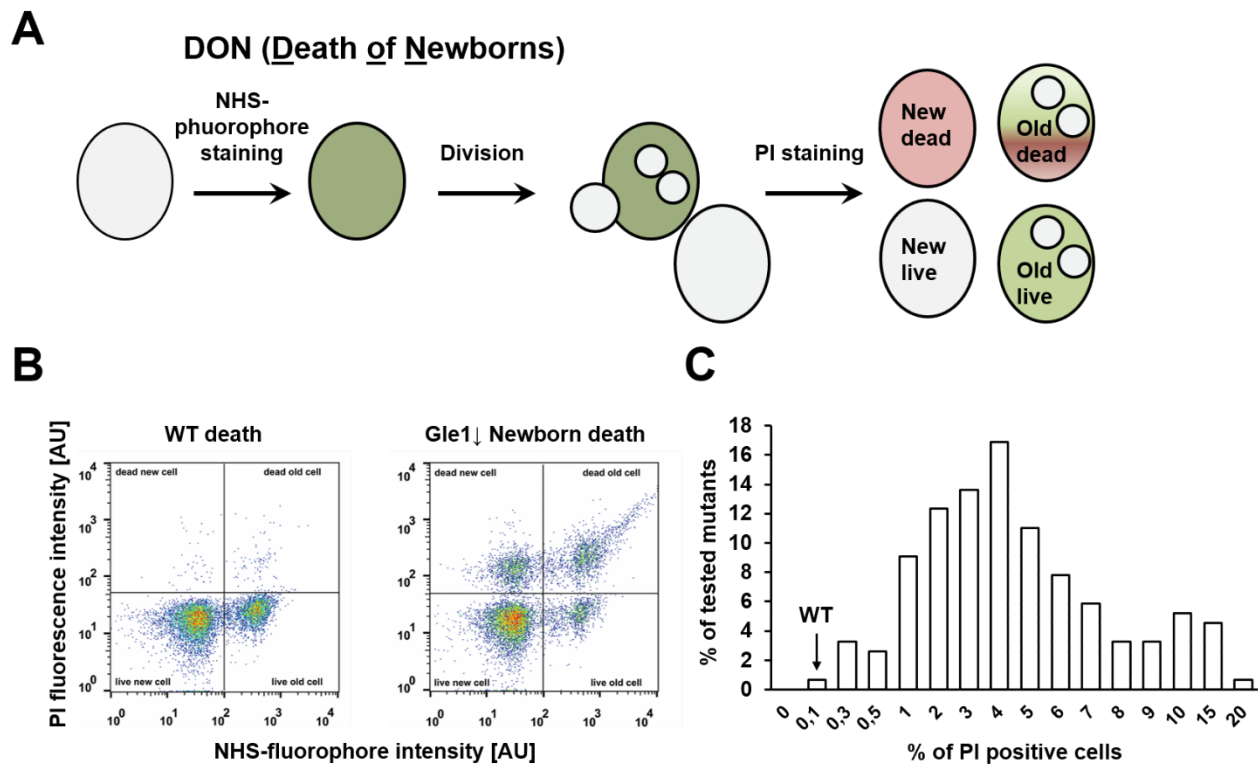

12

13 **Figure 3. Phloxine B positive mutants exhibit increased chance of rapid death in early life.** (A) Schematic of the  
 14 method to assay death of newborn cells (DON). (B) Scatter plots of cells not exhibiting (left) or exhibiting (right)  
 15 considerable death of newborn cells, as obtained by flow cytometry. (C) Distribution of percentage of PI-positive cells in  
 16 various tested mutants and WT strain in young cells as assayed using the DON method (number of analyzed mutants –  
 17 77). Each strain was analyzed twice in independent experiments, with a similar trend being observed.

18

19 **Real time analysis of cell death**

1 In order to monitor the death of both mother and daughter cells, as well as to determine how quickly  
2 cell death occurs and whether there are some changes to the cell prior to death, we employed real-  
3 time microscopy in the presence of phloxine B. We also tested whether PI/phloxine B staining might  
4 occur transiently, without cell death, as reported for PI staining under specific circumstances (28–30).  
5 Thus, we monitored the division and permeabilization of cells in the presence of phloxine B. Due to  
6 the labor intensity of microfluidic assays, we analyzed only 5 strains: 4 phloxine B positive strains,  
7 and a WT strain.

8 First, we found that strains selected based on colony staining indeed commonly exhibited cells that  
9 acquired phloxine B staining during culturing (Figure 4A and Videos 1 and 2). We did not observe  
10 any cells that proceeded through division after they had acquired robust phloxine B staining. We also  
11 found that phloxine B acquisition correlated with increased transparency in the phase contrast channel  
12 (Figure 4C, D), indicating a considerable change of phase properties, as was noted previously during  
13 the quantitative phase contrast microscopy study of yeast death in response to plant defensin treatment  
14 (31). The same is also observed in human cells (32). This increased transparency was somewhat  
15 reduced after it appeared, while the phloxine B signal increased and persisted indefinitely. Notably,  
16 cells stained with phloxine B did not disappear or experience complete lysis in any of the tested strains  
17 during our observations. Also, we did not observe any phloxine B negative cells that arrested division,  
18 which suggests that no other, non-permeabilizing type of death or probabilistic shift into quiescence  
19 took place in the studied strains (Dataset S3).

20 A common occurrence in the phloxine B positive strains was that they exhibited high levels of cell  
21 death at the budding stage. For all of the tested strains, this represented 30-75% of the dead cells  
22 observed (Figure 4B, C and Video 1). Also, cells quite often died shortly after cytokinesis (Figure 4B,  
23 D and Video 2). Notably, in both cases, death could sometimes be observed only in the daughter cell,  
24 only in the mother cell, or in both the cells simultaneously without any discernible pattern.

25 The data indicate that budding and cytokinesis are high periods of the yeast lifecycle, when  
26 perturbation of different systems seemingly unrelated with these processes can increase the likelihood  
27 of a catastrophic failure.

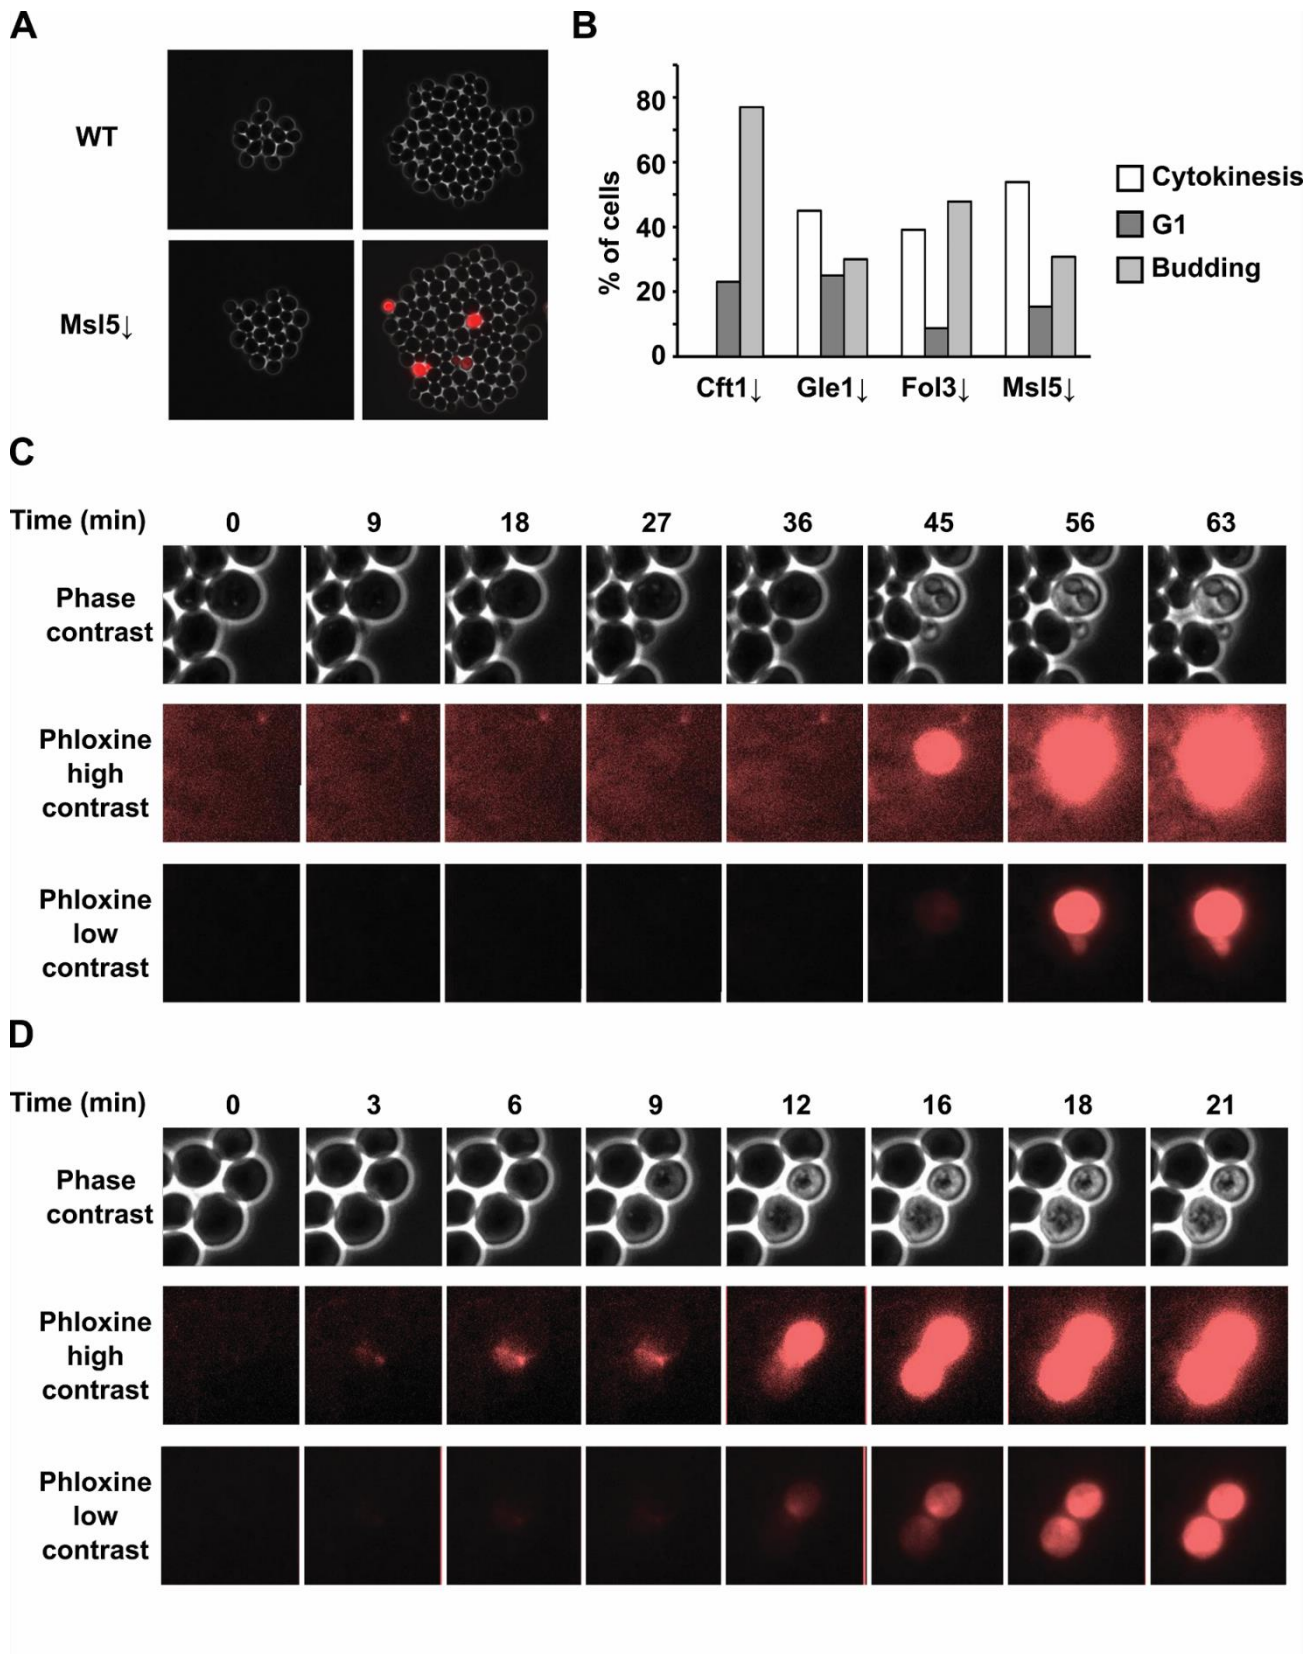

1

2 **Figure 4. Real-time visualization of cell death accompanied by membrane permeabilization.** Cells were grown in a  
 3 microfluidics chamber supplied with YPD medium containing phloxine B and visualized using differential interference  
 4 contrast and fluorescence imaging. (A) Microcolonies of yeast at two different timepoints. (B) Histogram of the

1 approximate cell cycle stages of cell death for different mutants (number of analyzed dead cells – CFT1 – 24; GLE1- 27;  
2 FOL3 – 34; MSL5 - 32. (C) Time lapse images of a mother dying with a small bud for a mutant with *CFT1* knockdown  
3 (See video 1). (D) Time-lapse images of a mother-daughter pair of cells which die during cytokinesis for the mutant with  
4 *MSL5* knockdown (See video 2 and video 3). All time lapse experiments were performed in two independent runs for each  
5 strain, with no less than 4 chambers, i.e. microcolonies, analyzed for each strain during a run. A control strain was also  
6 included into each run.

## 7 **Phloxine phenotypes are strongly associated with indications of membrane and cell wall** 8 **dysfunction**

9 Why would bud generation and cytokinesis be vulnerable stages of the life cycle? We hypothesized  
10 that during these stages, the budding yeast cell-pair (mother and daughter) needs to rapidly and  
11 precisely expand and/or remodel both the plasma membrane and the cell wall. In order to test whether  
12 impairments in these organelles might be common among phloxine B positive mutants, we tested 76  
13 of these mutants, as well as a control subset of phloxine B negative mutants from the DAMP collection  
14 for sensitivity to growth on SDS and ethanol (associated with effects on both the plasma membrane  
15 and lipid metabolism) (33–35) as well as to two cell wall stressors: Calcofluor white (CFW), which  
16 interacts with chitin (36) and other cell wall carbohydrates, and Congo Red, which interacts with  $\beta$ -  
17 1,3-d-glucan (37). We observed that for a set of phloxine B positive mutants with reduced abundance  
18 of essential proteins, ~25, 45 and 25% of the strains were sensitive to SDS, ethanol or CFW,  
19 respectively (Figure 5 and Figure S3, Dataset S4), while almost none from a randomly selected set of  
20 90 phloxine B negative mutants from the same collection exhibited sensitivity. Notably, Congo Red  
21 showed no dramatic difference between the number of sensitive mutants between the phloxine B  
22 positive and negative sets (Figure 5). These observations suggest that phloxine positive mutants are  
23 specifically sensitive to some stressors targeting the cell membrane and cell wall, but not to all of the  
24 tested stressors.



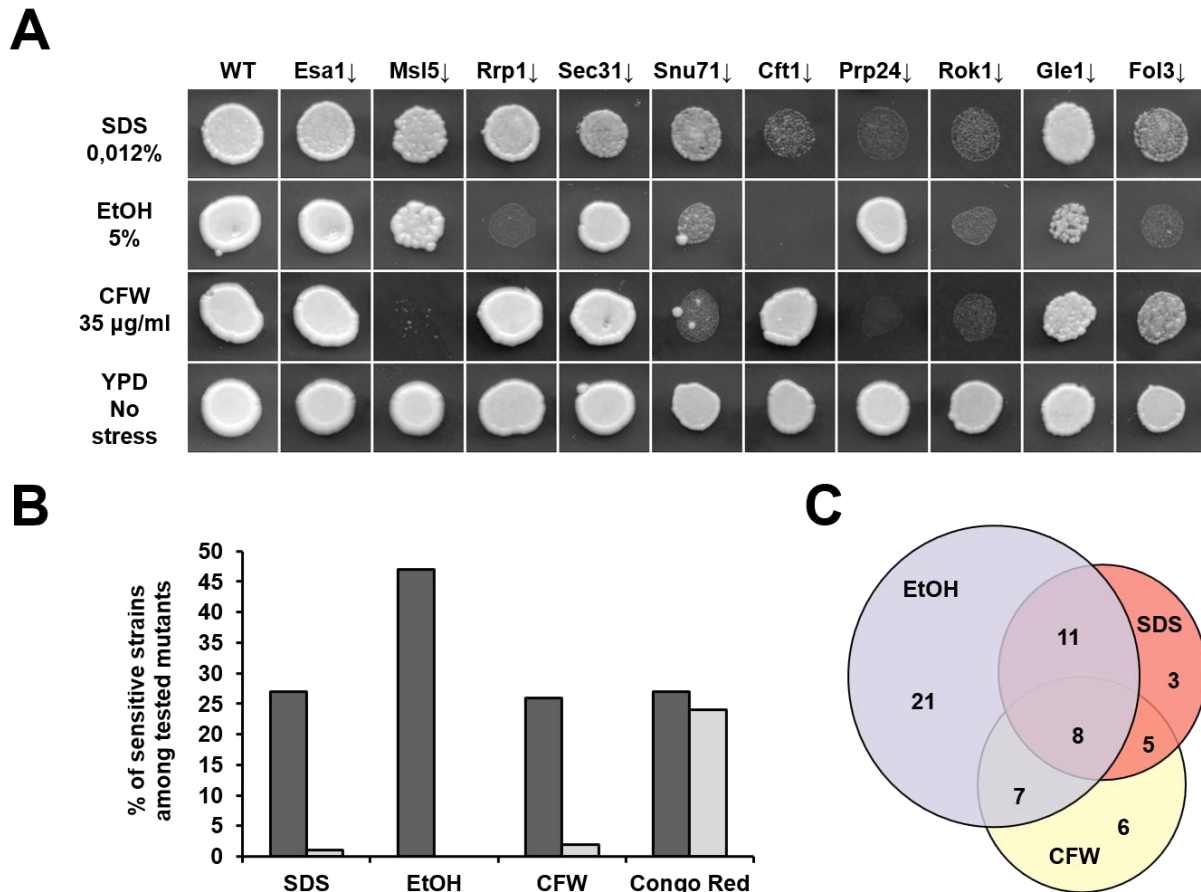

1

2 **Figure 5. Phloxine B positive mutants with reduced abundance of essential proteins are sensitive to**  
3 **membrane/cell wall stress.** (A) Determination of stress sensitivity of indicated Phloxine B positive mutants. Complete  
4 data are available in Figure S3 (76 mutants tested) (B) Phloxine B positive mutants (dark shading) show high incidence  
5 of sensitivity to ethanol, SDS, Calcofluor white, but not Congo Red respectively, as compared to a control set of non-  
6 phloxine staining mutants from the same mutant collection (90 mutants tested) (light shading). (C) Venn diagram of the  
7 stressor assays with the number of sensitive mutants in each sector.

8 **Identification of universal features of phloxine B positive mutants and mitigation of death**  
9 **caused by different mutations**

10 A wide range of literature on cell death in response to various stimuli in yeast is available and a  
11 common feature of death is the generation and causative role of reactive oxygen species (ROS) in  
12 death. Lipid peroxidation in the membrane might also explain the commonality of membrane  
13 impairment in various mutants. Thus, to see whether reactive oxygen species (ROS) played a role in  
14 the cell death observed in our study, we used the ROS-sensitive stains dihydroethidium (DHE) (89  
15 mutants tested) and 2',7'-Dichlorodihydrofluorescein diacetate (DCFDA) (79 mutants tested) to detect  
16 presence of oxidative stress among phloxine-positive mutants. This revealed increased levels of ROS  
17 (>2-fold) in only 11 of the tested mutants for DHE staining, and 9 for DCFDA) (Figure 6A and

1 Datasets S5 and S6). However, these mutants did not show a lowered chance of death in response to  
2 the supplementation with N-acetyl-cysteine, rather they were often more sensitive, sometimes quite  
3 dramatically so (Figure 6B). In order to get a more complete understanding of the effect of this  
4 antioxidant on cell death in phloxine-positive mutants, we tested 79 mutants, and observed that only  
5 1 of them (Mdn1 $\downarrow$ ) exhibit a more than 2-fold reduced cell death in response to medium  
6 supplementation with NAC (Dataset S6). Notably, this strain did not exhibit increased staining with  
7 DHE or DCFDA. This suggests that in most of the tested phloxine-positive mutants, death is not  
8 caused by oxidative stress, while in the few strains that do exhibit increased ROS levels, this increase  
9 is not a pro-death factor, but might actually be an adaptive response.

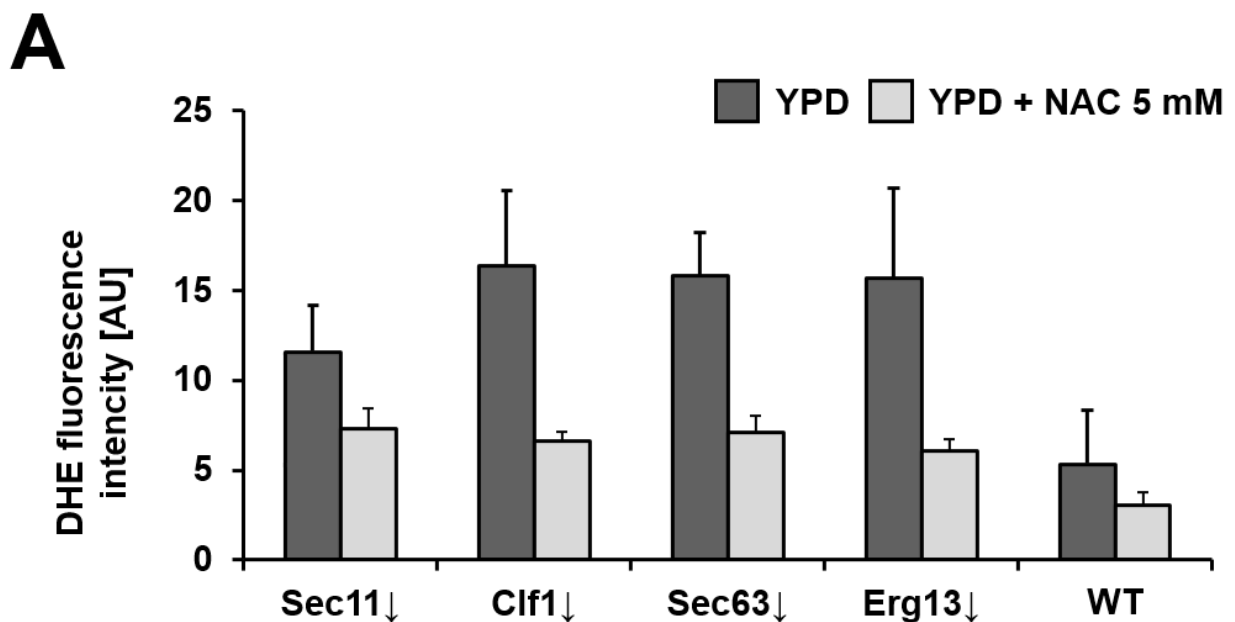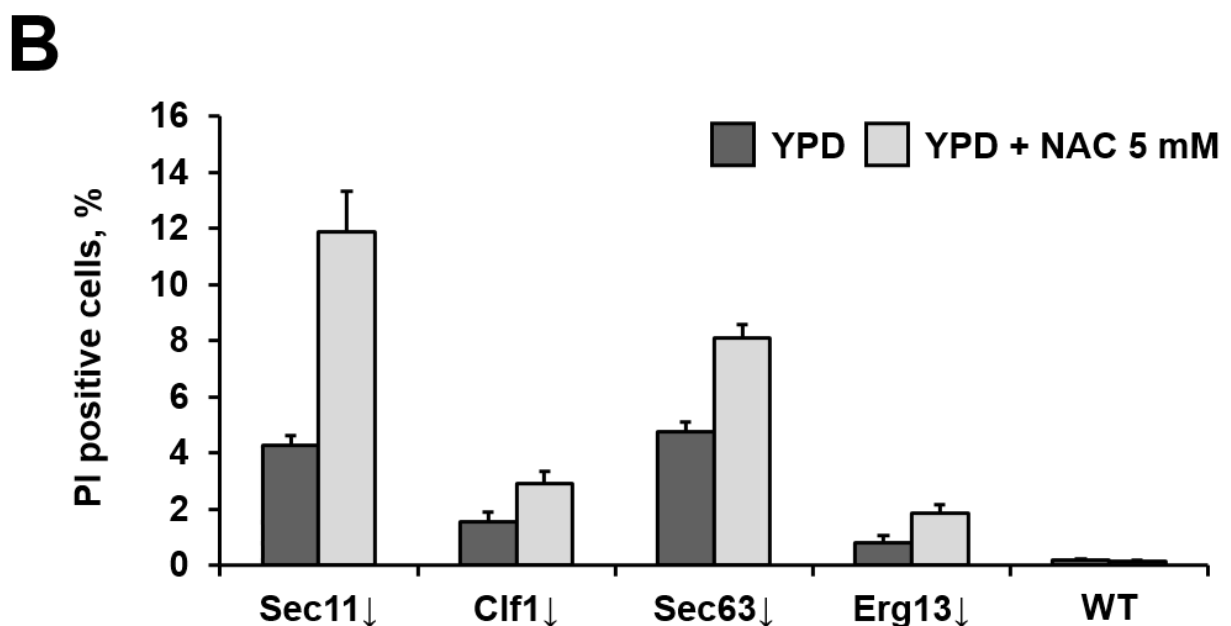



1 **Figure 6. Cell death of phloxine B positive mutants with chronic oxidative stress is not prevented by N-acetyl**  
2 **cysteine (NAC).** (A) The presented Phloxine B positive mutants exhibit increased staining by DHE in living (Sytox-green  
3 negative) cells (identified by screening 89 mutants, see figure S4). This staining is mitigated by N-acetyl-cysteine (NAC)  
4 treatment. (B) Treatment with NAC does not reduce, but rather stimulates cell death in the strains exhibiting increased  
5 DHE fluorescence in living (PI-negative) cells.

6 After that, we tested a range of other treatments that might have mitigating effects on cell death. This  
7 was done by plating 81 identified phloxine B positive mutants onto YPD with phloxine B  
8 supplemented by various compounds (Figure 7A). Some of the tested treatments indeed mitigated cell  
9 death but only in a limited number of mutants and this data might be useful for a deeper understanding  
10 of cell death mechanisms in future studies (Figure S5). However, two treatments had a strong  
11 mitigating effect on nearly all of the mutants – these were the use of potassium acetate as a carbon  
12 source, and buffering the medium to pH 7. Because cultivation in potassium acetate increased external  
13 pH and other non-fermentable carbon sources (ethanol, glycerol) did not mitigate the phloxine B  
14 phenotype (data not shown), we concluded that the effect of potassium acetate and pH buffering were  
15 one and the same, and were due to the neutral external pH. Unlike all of the other tested treatments,  
16 whose effects were limited to ~30% of the mutants or less, increased external pH reduced the phloxine  
17 B phenotype in most of the tested mutant colonies (Figure 7A, Figure S5, Dataset S7). Because of the  
18 possibility that phloxine staining is pH-dependent irrespective of cell death rates, we also verified our  
19 results by testing cells grown at buffered pH without phloxine B, but then washed the cells (to control  
20 for the effect of external pH on the staining) and stained with PI (Figure 7B), confirming the results  
21 obtained using phloxine B.

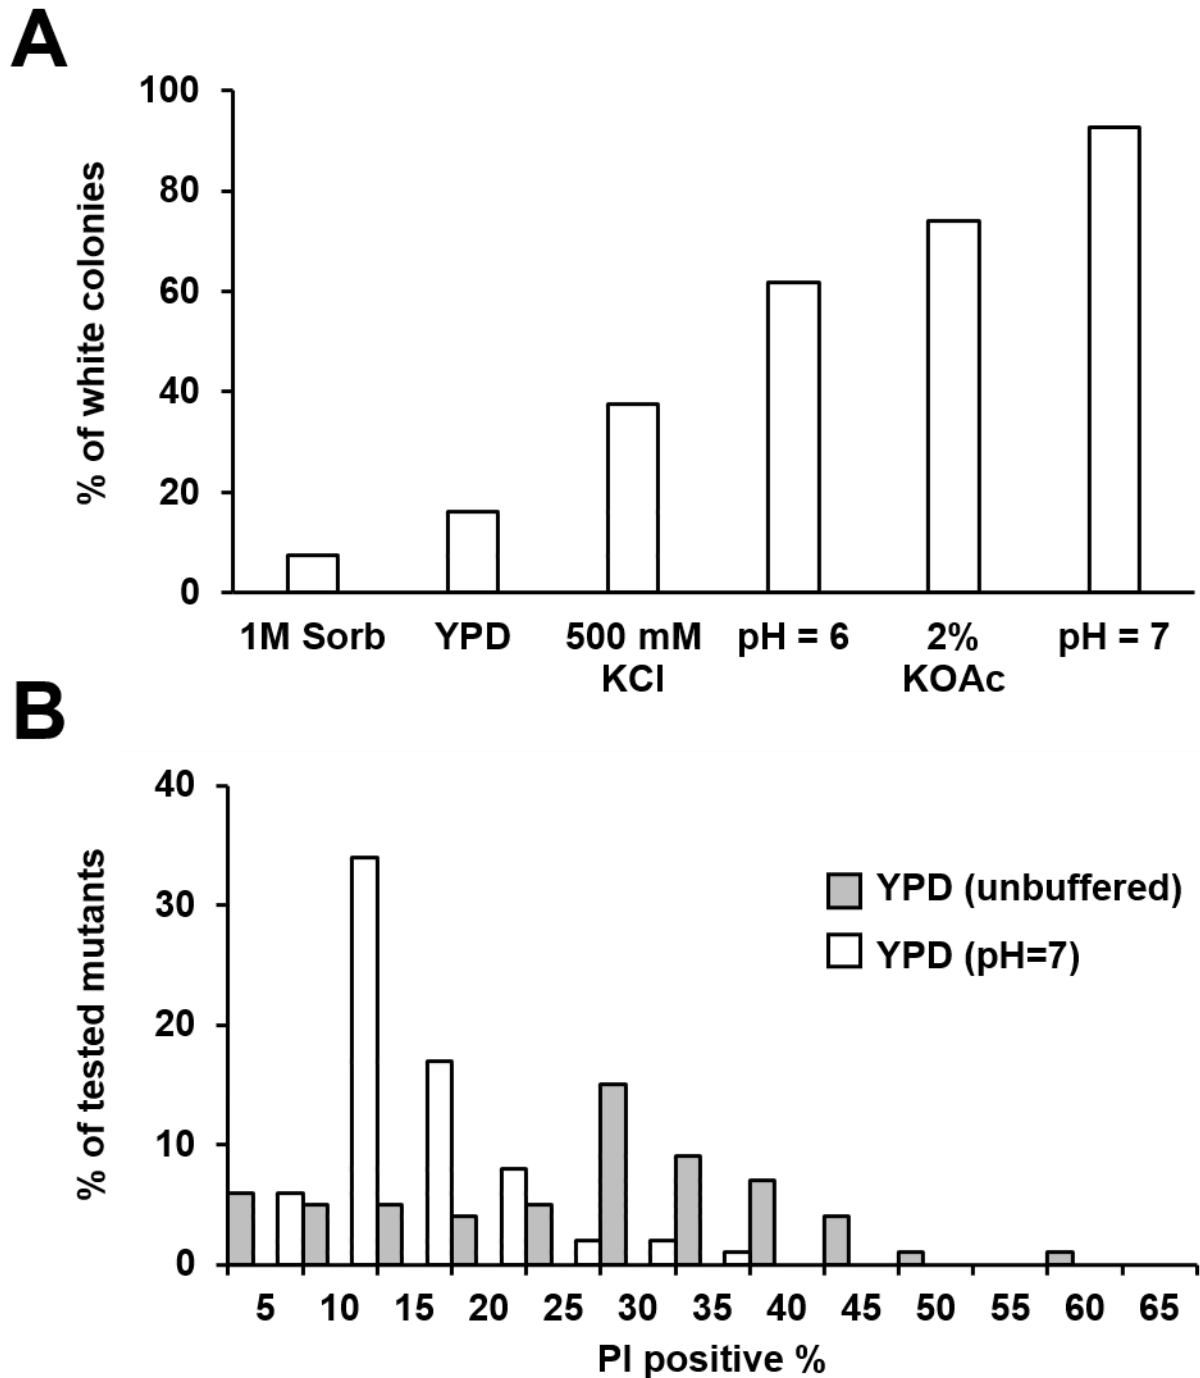

1

2 **Figure 7. Various treatments reduce phloxine staining in specific mutants, with external pH stabilization having a**  
3 **near-universal effect.** (A) 81 mutants exhibiting varying degrees of phloxine staining were plated onto YPD medium  
4 containing phloxine B supplemented with the denoted component (except for 2% KOAc, in which 2% potassium acetate  
5 was used as a carbon source instead of glucose). The graph denotes the share of tested mutants with a non-phloxine B  
6 staining phenotype. Sorb – sorbitol, KCl – potassium chloride, pH=6 – buffering with 20 mM phosphate buffer; KOAc –  
7 potassium acetate as the sole carbon source; pH=7 buffering with 20 mM phosphate buffer (B) The same mutants (see (A)  
8 and Figure S5) were grown in normal YPD or YPD buffered to pH=7. They were subsequently stained with PI and the %  
9 of PI-staining cells was measured by flow cytometry.

1 Thus, our results show that neutral external pH has a near-universal mitigating effect on the occurrence  
2 of necrotic death associated with division. We hypothesized that breaching of the cell membrane might  
3 foremostly be deadly due to cytoplasmic acidification. If this was case, then at lower pH, membrane  
4 permeabilization should be irreversible, as observed above, while at higher pH, where no acidification  
5 occurs during rupture, the membrane damage could be repaired, and manifest as a transient  
6 permeabilization event. Using microfluidics, we tested this hypothesis but did not detect any transient  
7 permeabilization events (data not shown).

8

## 9 **Discussion**

10 In this study, we performed the first systematic identification of genes, both essential and non-  
11 essential, whose perturbation increases the rate of necrotic cell death involving membrane  
12 permeabilization in dividing *S. cerevisiae*. While the overall populations of identified mutants  
13 exhibited an increased chance of cell death, most cells were capable of multiple divisions. We  
14 considered a possibility that, for downregulated essential genes, this stochastic effect may be caused  
15 by the unequal downregulation of gene expression and therefore protein levels in different cells of the  
16 colony; however, the same effects were seen for the gene deletion mutants, where all cells are equally  
17 targeted. Thus, while stochastic cell death might be influenced by the heterogenous expression of  
18 target genes, it should also be related to some other forms of cell to cell variation or probabilistic  
19 events.

20 Our results clearly demonstrate that perturbation of numerous cellular systems may result in an  
21 increased chance of necrotic cell death. The identified genes and their enrichment patterns closely  
22 followed the enrichment exhibited by essential genes (Figure 2C), even though a third of the genes  
23 identified in this work were non-essential. However, some gene categories that represent a sizeable  
24 fraction of essential genes were absent among the mutants we identified. For example, according to  
25 the SAFE analysis, essential genes are enriched in the protein turnover category, which was not  
26 detected in our data (Figure 2C). Apparently, impairment of genes in this category does not result in  
27 necrotic death or alternatively this impairment needs to be more severe than what could be achieved  
28 by this type of downregulation (25).

29 Since our screen revealed the overall enrichment of genes implicated in cell cycle, cytoskeletal  
30 functions, and organelle localization (Figure 2A), and we observed death during the small bud stage  
31 and shortly after cytokinesis (Figure 5 and Movies 1 and 2), we hypothesize that perturbations in

1 various unrelated processes can affect the ability of the cell to repair or generate the cell wall or plasma  
2 membrane during bud formation and/or cytokinesis. Although this was not detected as a statistically  
3 significant enrichment, 10 out of the identified 126 genes are involved in lipid metabolism, which is  
4 a key process for membrane synthesis and remodeling, with 6 more were reported to be sensitive to  
5 ethanol (38), a phenotype associated with impaired plasma membrane (39). Notably, changes in lipid  
6 synthesis have been reported to occur during the cell cycle in yeast (40) and mammalian cells (41).  
7 We were also able to obtain additional support for the impairment of the membrane and cell wall by  
8 characterizing specific sensitivities to membrane- and cell-wall disrupting compounds. On the other  
9 hand, sorbitol, which often reduces toxicity of cell-wall perturbing compounds, did not show a  
10 mitigating effect on cell death in most mutants. This finding suggests that overall breakdown of the  
11 cell wall is unlikely to be the direct cause of cell death. However, the commonality of CFW sensitivity  
12 among phloxine B mutants suggests that some functions that involve chitin might be involved. This  
13 is also highlighted by the observations that stochastic necrosis is associated with cytokinesis, which  
14 involves deposition of reparative chitin at the site of bud/birth scar formation.

15 Our ability to differentiate between spatial patterns of cell death in colonies allowed us to uncover  
16 differences between cell death caused by distinct genetic perturbations. Mutants prone to death on the  
17 colony edges exhibited enrichment of genes belonging to the mitosis and cell polarity/morphogenesis  
18 categories. This suggests that the cells located on the bottom and edge of the colony, and thus  
19 experiencing the highest availability of nutrients and exhibiting rapid division (18, 42) are more prone  
20 to death in response to the impairment of genes involved in cell division.

21 Mutants prone to homogenous death throughout the colony exhibited enrichment in genes belonging  
22 to the tRNA wobble modification cluster, which was not observed for other groups of phloxine B  
23 positive mutants and may reflect regulation of cell proliferation based on tRNA abundance and mRNA  
24 codon usage (43, 44). Interestingly, mutants exhibiting this pattern of dead cell distribution were also  
25 enriched in the genes at the intersection of mitosis and DNA-repair and replication clusters. This  
26 suggests that some aspects of DNA repair might be important for survival of both rapidly dividing  
27 cells on the outside of the colony, as well as slowly dividing or non-dividing cells in the colony center.

28 Mutants prone to death at the center of a colony showed enrichment in genes related to vesicle  
29 transport and glycosylation/protein folding/cell wall categories, suggesting that damage to these  
30 machineries is especially relevant to starving and/or respiring cells known to inhabit the deeper  
31 regions of colonies (42). Interestingly, this pattern of cell death has previously been reported in yeast  
32 colonies growing on non-fermentable carbon sources for prolonged periods of time (17).

1 Overall, different patterns of cell death in the colonies demonstrate that dividing and non-dividing  
2 cells, or cells with different physiology might have very distinct sensitivities to diverse death stimuli,  
3 i.e. it might be possible that cells at the colony center might be physically or chemically shielded by  
4 cells in direct contact with the medium. Such phenomena have been reported previously, including  
5 nutrient sharing between dying cells on the inside of a colony and live cells on the edge (17) and the  
6 protective role of dead cells against the effects of polyene antifungal drugs (45).

7 Identification of mutants with an increased probability of cell death provided us with an opportunity  
8 to study dynamics of this novel type of cell death. One notable observation was that the death was  
9 most often rapid, as evidenced by the DON assay and microfluidics data (Figures 3 and 5 and videos).  
10 This is in contrast to the observation of a relatively slow onset of necrosis in senescent cells obtained  
11 during replicative aging (46, 47). Also, this is unlike the case of hydrogen peroxide stress, which, at  
12 lower concentrations, induces cell death via processes that do not involve rapid membrane  
13 permeabilization, and causes necrosis at higher concentrations (48). Because we did not observe any  
14 abnormal cellular features or division arrest prior to cell death, we assume that the death type is most  
15 likely primary necrosis occurring as a consequence of stochastic damaging events. This conclusion  
16 challenges the common view of necrosis being mainly a feature of severe stress, as opposed to  
17 apoptotic death, which occurs during milder perturbations.

18 To sum up, our work is the first to identify genetic perturbations that increase the chance of cell death  
19 in proliferating cells and, most likely, many of these mutations cause cell death associated with the  
20 process of cell division. They also demonstrate that seemingly functionally unrelated mutations cause  
21 cell death that can be mitigated, via an unknown mechanism, by stabilizing external pH near neutral  
22 level, and that mutants with this type of cell death often exhibit phenotypes associated with perturbed  
23 properties of the plasma membrane and/or cell wall. This suggests that different impairments to the  
24 complex architecture of the cell seem to have a universal downstream effect on some stochastically-  
25 dangerous processes, in this case –possibly the maintenance of optimal plasma membrane or cell wall  
26 condition during division. We also provide a set of new methods to study cell death: high-throughput  
27 screening and microfluidics based on phloxine B staining, which can detect increased rates of cell  
28 death under various conditions and distinguish different types of dead cell distribution in colonies, as  
29 well as the DON assay to detect rapid necrosis in young cells. Finally, our work identifies a large set  
30 of mutants that exhibit stochastic necrosis and may be characterized in greater detail in future studies,  
31 thereby leading to a better understanding of specific differences in the modes of cell death caused by  
32 particular genetic perturbations.

1

## 2 **Materials and Methods**

### 3 **Yeast strains**

4 Strains used in this work were derivatives of the BY4741 strain (*MATa his3Δ1 leu2-D0 met15 Δ0 ura3*  
5 *Δ0*), obtained in the studies by (2, 25).

### 6 **Screening of genome-wide mutant collections**

7 Strains from the tested collection were refreshed on YPD medium and then pin-spotted onto YPD  
8 with phloxine B (30 μM) (Acros Organics, Cat # 189470250) using 384-pin replicators with long pins  
9 (Singer, UK). The colonies were grown for 48 hours and then scanned using an Epson Perfection  
10 V550 Photo flatbed scanner at 2000 dpi. For optimal viewing of phloxine B staining phenotype, FIJI  
11 (49) was used to extract green channel images from the raw RGB, thus providing the highest contrast  
12 in terms of phloxine staining. Each library plate was tested at least twice and strains that did not show  
13 reproducible results were not taken up for further analysis.

### 14 **Gene enrichment analysis and SAFE**

15 Gene enrichment analysis was performed using The GO Term Finder (Version 0.86) which can be  
16 found at <https://www.yeastgenome.org/goTermFinder>. Proportional Venn diagrams were constructed  
17 using BioVenn (50). SAFE analysis was done using tools described in (26) for separate lists of genes  
18 identified as having different phloxine B staining patterns, and then combined onto a single map.

19

### 20 **Flow cytometric methods**

21 Flow cytometry was performed in 96-well plates using a Guava EasyCyte 8HT flow cytometry system  
22 (Millipore, USA) equipped with a 488 nm laser and a Cytotflex S equipped with a 405, 488 and 561  
23 nm laser. Where applicable, cell fluorescence was measured in the green (525/30 nm) (for FAM  
24 fluorescence detection in the DON method and Sytox green fluorescence) and red (690/50 nm)  
25 channel (for PI and DHE fluorescence detection). For all experiments except those with ROS levels  
26 assayed by DHE, prior to analysis, cells were stained with PI (2 μg/ml) for 1 hour in distilled water.  
27 For detection of dead cells in experiments using DHE, Sytox Green was used in similar fashion.

### 28 **Determination of dead cell numbers in liquid cultures**

1 Stationary liquid cultures were obtained by growing cells in 96-well plates with shaking at 30°C,  
2 stained with PI as noted above and analyzed using flow cytometry.

### 3 **Determination of differential death in yeast colony regions**

4 Colonies of yeast grown on YPD medium for 48 hours were used for manual collection of cells from  
5 the outer edge and center of a colony using a sterilized wire loop. These cells were suspended in  
6 distilled water and then stained and analyzed as noted above.

### 7 **Death of Newborns Assay**

8 Stationary cultures of yeast cells were grown in 96-well plates, then diluted by a factor of 50 with  
9 fresh YPD. After allowing sufficient time to divide 2-3 times, these cells were stained using FAM-  
10 NHS (Lumiprobe, Russia) to label the cell wall green. Cells from overnight cultures that were diluted  
11 50-fold in fresh YPD and allowed to regrow for 5 hours were spun down in plates, washed twice with  
12 distilled H<sub>2</sub>O, spun down again and the supernatant was removed. FAM-NHS was added to each well  
13 (1 mM concentration) in a volume of 30 µl in 10 mM PBS (pH = 7.5). After 10 minutes of vigorous  
14 shaking in a plate covered with aluminum foil, the cells were washed 3 times with 120 µl of distilled  
15 water per each well. The obtained cells were then split into aliquots, one of which was kept for analysis  
16 as the zero time point, while the other was inoculated into YPD and allowed to accomplish a few  
17 divisions before flow cytometric analysis. The unlabeled cells were considered to be the youngest,  
18 because they were the ones that appeared after the staining procedure.

### 19 **Microfluidic-based real-time microscopy**

20 Live-cell real-time microscopy was performed in a custom-made microfluidic device made of  
21 polydimethylsiloxane and a glass cover-slip that allows trapping of cells in a dedicated region of  
22 interest, limiting colony growth in the XY-plane. Constant medium flow at 20 µl/min was applied,  
23 enabling imaging of colony growth over several generations. Cells were cultured in YPD medium  
24 containing 300 nM Phloxine B. A Nikon Eclipse Ti-E with SPECTRA X light engine illumination  
25 and an Andor iXon Ultra 888 camera was used for epifluorescence microscopy. A plan-apo λ  
26 100x/1.4Na Ph3 oil immersion objective was used to take phase-contrast and fluorescence images  
27 with a 3-minute frame rate. For automated focusing, the built-in Nikon perfect focus system was used  
28 during the experiment. Phloxine B fluorescence was imaged by exposure for 200 ms, illuminating  
29 with the SPECTRA X light engine at 556 nm and about 10 mW power. Identical settings were used  
30 for each of the experiments. Temperature control was achieved by setting both a custom made heatable  
31 insertion and an objective heater to 30°C.



## 1 **Measurements of ROS levels and determination of the effects of NAC**

2 For testing of the levels of ROS using DHE and DCFDA, cells were grown overnight on solid YPD  
3 medium, after which they were resuspended in YPD (or YPD with 5mM NAC), incubated for 6 hours  
4 (with addition of Sytox Green or PI 30, as well as ROS-sensitive stain (final concentration - 10 µg/ml  
5 DCFDA; DHE – 5 µg/ml) 30 minutes prior to the end of the incubation), and then subjected to flow  
6 cytometry. ROS levels were only scored in cells negative for Sytox Green/PI.

7 For targeted testing of the effects of NAC on ROS levels and cell death (Figure 6), cells were grown  
8 to logarithmic phase in YPD or YPD with 5mM NAC, after which the levels of ROS and the amount  
9 of dead cells was measured using DHE and Sytox green together, and Propidium iodide alone,  
10 respectively.

## 11 **Detection of phloxine B staining under various conditions and testing of mutant sensitivity to** 12 **various compounds**

13 A subset of the identified phloxine positive mutants (Figure S4 and Dataset S6) as well as the control  
14 wild type strains were plated onto YPD medium containing phloxine B or the same medium  
15 supplemented with various compounds (1M Sorbitol, pH buffers). For sensitivity testing, we first  
16 determined the maximal concentration at which the wild-type strain showed robust growth on YPD  
17 medium supplemented with stressors (SDS, Ethanol, CFW, Congo Red), and then plated the subsets  
18 of phloxine positive and negative mutants (Figure S3 and Dataset S4) onto plates with these identified  
19 concentrations. Phloxine phenotype and growth sensitivity was scored manually. Each experiment  
20 was performed at least twice.

## 21 **Acknowledgements**

22 S.E.D. is a member of the Interdisciplinary Scientific and Educational School of Moscow University  
23 “Molecular Technologies of the Living Systems and Synthetic Biology”.

## 24 **Funding**

25 This project was partially funded by a grant from the President of the Russian Federation for Young  
26 Scientists MK-3323.2019.4 (initial screening of the deletion collections, DON method and  
27 microfluidics), the Russian Science Foundation grant #21-74-10115 (identifying conditions that  
28 prevent cell death, study of sensitivity of phloxine B mutants to stressful treatments, study of ROS-  
29 related effects) and the Ministry of Science and Higher Education of the Russian Federation (base  
30 funding).

1  
2  
3  
4  
5  
6  
7  
8  
9  
10  
11  
12  
13  
14  
15  
16  
17  
18  
19  
20  
21  
22  
23  
24  
25  
26  
27  
28

## Author contributions

AIA conceived and performed the experiments, analyzed data, drafted the manuscript, contributed funding and equipment, EVG performed experiments, analyzed data and created figures, OVM performed experiments, AVN analyzed data and created figures, IVK performed experiments and aided in data analysis, RS provided equipment and analyzed data, ESS performed experiments and provided equipment, SED analyzed data, discussed the results, and edited the manuscript, VNG conceived the study, discussed the results, and edited the manuscript.

## References

1. G. Liu, *et al.*, Gene Essentiality Is a Quantitative Property Linked to Cellular Evolvability. *Cell* **163**, 1388–1399 (2015).
2. G. Giaever, *et al.*, Functional profiling of the *Saccharomyces cerevisiae* genome. *Nature* **418**, 387–391 (2002).
3. K. Kobayashi, *et al.*, Essential *Bacillus subtilis* genes. *Proc. Natl. Acad. Sci.* **100**, 4678–4683 (2003).
4. T. Wang, *et al.*, Identification and characterization of essential genes in the human genome. *Science* **350**, 1096–1101 (2015).
5. J. K. White, *et al.*, XGenome-wide generation and systematic phenotyping of knockout mice reveals new roles for many genes. *Cell* **154**, 452 (2013).
6. D. E. Gottschling, T. Nyström, The Upsides and Downsides of Organelle Interconnectivity. *Cell* **169**, 24–34 (2017).
7. L. Galluzzi, *et al.*, Molecular mechanisms of cell death: recommendations of the Nomenclature Committee on Cell Death 2018. *Cell Death Differ.* **25**, 486–541 (2018).
8. X. Liu, *et al.*, There are only four basic modes of cell death, although there are many ad-hoc variants adapted to different situations. *Cell Biosci.* **8**, 6 (2018).
9. E. V. Grosfeld, *et al.*, A Systematic Survey of Characteristic Features of Yeast Cell Death Triggered by External Factors. *J. Fungi* **7**, 886 (2021).
10. B. Sampaio-Marques, W. C. Burhans, P. Ludovico, “Yeast at the Forefront of Research on

- 1           Ageing and Age-Related Diseases” in (2019), pp. 217–242.
- 2   11.    C. He, C. Zhou, B. K. Kennedy, The yeast replicative aging model. *Biochim. Biophys. Acta -*  
3           *Mol. Basis Dis.* **1864**, 2690–2696 (2018).
- 4   12.    D. Carmona-Gutierrez, *et al.*, Guidelines and recommendations on yeast cell death  
5           nomenclature. *Microb. cell* **5**, 4–31 (2018).
- 6   13.    T. Eisenberg, D. Carmona-Gutierrez, S. Büttner, N. Tavernarakis, F. Madeo, Necrosis in  
7           yeast. *Apoptosis* **15**, 257–268 (2010).
- 8   14.    S. A. Kochmak, D. A. Knorre, S. S. Sokolov, F. F. Severin, Physiological scenarios of  
9           programmed loss of mitochondrial DNA function and death of yeast. *Biochem.* **76**, 167–171  
10           (2011).
- 11   15.    C. Mazzoni, C. Falcone, Caspase-dependent apoptosis in yeast. *Biochim. Biophys. Acta - Mol.*  
12           *Cell Res.* **1783**, 1320–1327 (2008).
- 13   16.    M. Kuthan, *et al.*, Domestication of wild *Saccharomyces cerevisiae* is accompanied by  
14           changes in gene expression and colony morphology. *Mol. Microbiol.* **47**, 745–54 (2003).
- 15   17.    L. Váchová, Z. Palková, Physiological regulation of yeast cell death in multicellular colonies  
16           is triggered by ammonia. *J. Cell Biol.* **169**, 711–717 (2005).
- 17   18.    A. Traven, *et al.*, Transcriptional Profiling of a Yeast Colony Provides New Insight into the  
18           Heterogeneity of Multicellular Fungal Communities. *PLoS One* **7**, e46243 (2012).
- 19   19.    M. Čáp, L. Štěpánek, K. Harant, L. Váchová, Z. Palková, Cell Differentiation within a Yeast  
20           Colony: Metabolic and Regulatory Parallels with a Tumor-Affected Organism. *Mol. Cell* **46**,  
21           436–448 (2012).
- 22   20.    K. Bisht, C. A. Wakeman, Discovery and Therapeutic Targeting of Differentiated Biofilm  
23           Subpopulations. *Front. Microbiol.* **10** (2019).
- 24   21.    J. Kucsera, K. Yarita, K. Takeo, Simple detection method for distinguishing dead and living  
25           yeast colonies. *J. Microbiol. Methods* **41**, 19–21 (2000).
- 26   22.    M. Kwolek-Mirek, R. Zadrag-Tecza, Comparison of methods used for assessing the viability  
27           and vitality of yeast cells. *FEMS Yeast Res.* **14**, n/a-n/a (2014).

- 1 23. S. Lie, P. Banks, C. Lawless, D. Lydall, J. Petersen, The contribution of non-essential  
2 Schizosaccharomyces pombe genes to fitness in response to altered nutrient supply and target  
3 of rapamycin activity. *Open Biol.* **8**, 180015 (2018).
- 4 24. G. Giaever, C. Nislow, The Yeast Deletion Collection : A Decade of Functional Genomics.  
5 **197**, 451–465 (2014).
- 6 25. D. K. Breslow, *et al.*, A comprehensive strategy enabling high-resolution functional analysis  
7 of the yeast genome. *Nat. Methods* **5**, 711–718 (2008).
- 8 26. A. Baryshnikova, Systematic Functional Annotation and Visualization of Biological  
9 Networks. *Cell Syst.* **2**, 412–421 (2016).
- 10 27. M. Costanzo, *et al.*, A global genetic interaction network maps a wiring diagram of cellular  
11 function. *Science* **353**, aaf1420–aaf1420 (2016).
- 12 28. H. M. Davey, P. Hexley, Red but not dead? Membranes of stressed *Saccharomyces cerevisiae*  
13 are permeable to propidium iodide. *Environ. Microbiol.* **13**, 163–171 (2011).
- 14 29. S. Piccirillo, *et al.*, Cell Differentiation and Spatial Organization in Yeast Colonies: Role of  
15 Cell-Wall Integrity Pathway. *Genetics* **201**, 1427–1438 (2015).
- 16 30. L. Shen, Y. Li, L. Jiang, X. Wang, Response of *Saccharomyces cerevisiae* to the stimulation  
17 of lipopolysaccharide. *PLoS One* **9** (2014).
- 18 31. N. Anthony, *et al.*, Ptychographic imaging of NaD1 induced yeast cell death. *Biomed. Opt.*  
19 *Express* **10**, 4964 (2019).
- 20 32. T. Vicar, M. Raudenska, J. Gumulec, J. Balvan, The Quantitative-Phase Dynamics of  
21 Apoptosis and Lytic Cell Death. *Sci. Rep.* **10** (2020).
- 22 33. Z. Chi, N. Arneborg, Relationship between lipid composition, frequency of ethanol-induced  
23 respiratory deficient mutants, and ethanol tolerance in *Saccharomyces cerevisiae*. *J. Appl.*  
24 *Microbiol.* **86**, 1047–1052 (1999).
- 25 34. K. M. You, C.-L. Rosenfield, D. C. Knipple, Ethanol Tolerance in the Yeast *Saccharomyces*  
26 *cerevisiae* Is Dependent on Cellular Oleic Acid Content. *Appl. Environ. Microbiol.* **69**, 1499–  
27 1503 (2003).
- 28 35. F. Zhao, *et al.*, Multiple cellular responses guarantee yeast survival in presence of the cell

- 1 membrane/wall interfering agent sodium dodecyl sulfate. *Biochem. Biophys. Res. Commun.*  
2 **527**, 276–282 (2020).
- 3 36. B. J. Harrington, G. J. Hageage, Calcofluor White: A Review of its Uses and Applications in  
4 Clinical Mycology and Parasitology. *Lab. Med.* **34**, 361–367 (2003).
- 5 37. M. C. Semedo, A. Karmali, L. Fonseca, A high throughput colorimetric assay of  $\beta$ -1,3-d-  
6 glucans by Congo red dye. *J. Microbiol. Methods* **109**, 140–148 (2015).
- 7 38. W. Qian, D. Ma, C. Xiao, Z. Wang, J. Zhang, The Genomic Landscape and Evolutionary  
8 Resolution of Antagonistic Pleiotropy in Yeast. *Cell Rep.* **2**, 1399–1410 (2012).
- 9 39. C. M. Henderson, D. E. Block, Examining the role of membrane lipid composition in  
10 determining the ethanol tolerance of *saccharomyces cerevisiae*. *Appl. Environ. Microbiol.* **80**,  
11 2966–2972 (2014).
- 12 40. H. M. Blank, *et al.*, Abundances of transcripts, proteins, and metabolites in the cell cycle of  
13 budding yeast reveal coordinate control of lipid metabolism. *Mol. Biol. Cell* **31**, 1069–1084  
14 (2020).
- 15 41. G. E. Atilla-Gokcumen, *et al.*, Dividing Cells Regulate Their Lipid Composition and  
16 Localization. *Cell* **156**, 428–439 (2014).
- 17 42. Z. S. Marinkovic, *et al.*, A microfluidic device for inferring metabolic landscapes in yeast  
18 monolayer colonies. *Elife* **8**, 1–21 (2019).
- 19 43. J. C. Guimaraes, *et al.*, A rare codon-based translational program of cell proliferation.  
20 *Genome Biol.* **21**, 44 (2020).
- 21 44. H. Gingold, *et al.*, A Dual Program for Translation Regulation in Cellular Proliferation and  
22 Differentiation. *Cell* **158**, 1281–1292 (2014).
- 23 45. N. A. Kireeva, *et al.*, Adaptive Role of Cell Death in Yeast Communities Stressed with  
24 Macrolide Antifungals. *mSphere* (2021) <https://doi.org/10.1128/mSphere.00745-21>.
- 25 46. M. Molon, R. Zadrag-Tecza, T. Bilinski, The longevity in the yeast *Saccharomyces*  
26 *cerevisiae*: A comparison of two approaches for assessment the lifespan. *Biochem. Biophys.*  
27 *Res. Commun.* **460**, 651–656 (2015).
- 28 47. M. M. Crane, *et al.*, DNA damage checkpoint activation impairs chromatin homeostasis and

- 1 promotes mitotic catastrophe during aging. *Elife* **8** (2019).
- 2 48. F. Madeo, *et al.*, Oxygen stress: A regulator of apoptosis in yeast. *J. Cell Biol.* **145**, 757–767  
3 (1999).
- 4 49. J. Schindelin, *et al.*, Fiji: an open-source platform for biological-image analysis. *Nat. Methods*  
5 **9**, 676–682 (2012).
- 6 50. T. Hulsen, J. de Vlieg, W. Alkema, BioVenn – a web application for the comparison and  
7 visualization of biological lists using area-proportional Venn diagrams. *BMC Genomics* **9**,  
8 488 (2008).
- 9



**A**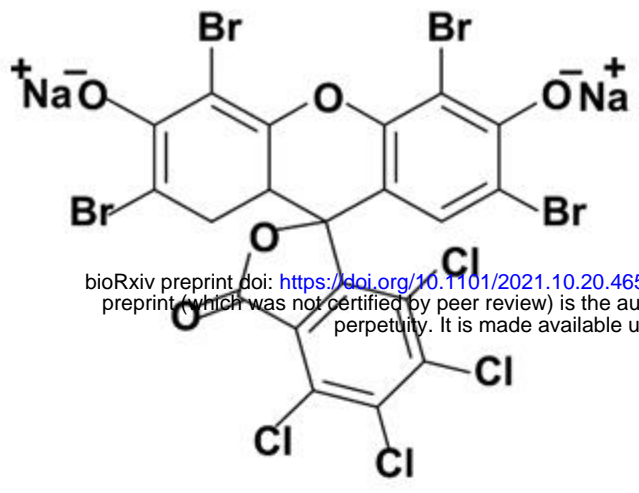

bioRxiv preprint doi: <https://doi.org/10.1101/2021.10.20.465133>; this version posted December 7, 2021. The copyright holder for this preprint (which was not certified by peer review) is the author/funder, who has granted bioRxiv a license to display the preprint in perpetuity. It is made available under aCC-BY-NC-ND 4.0 International license.

**B**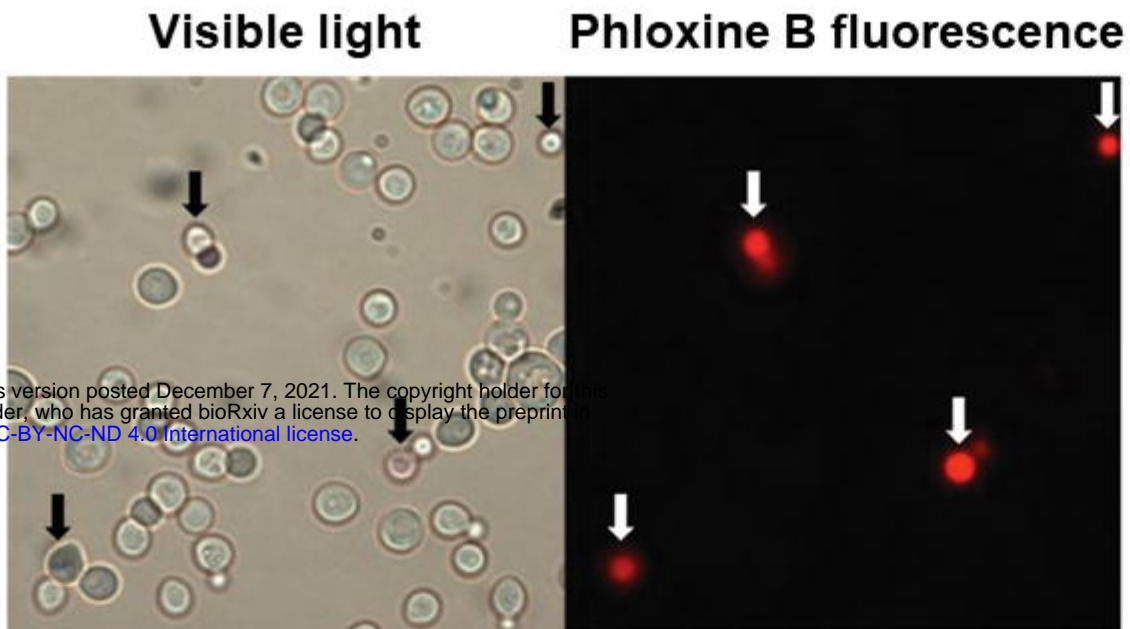**C**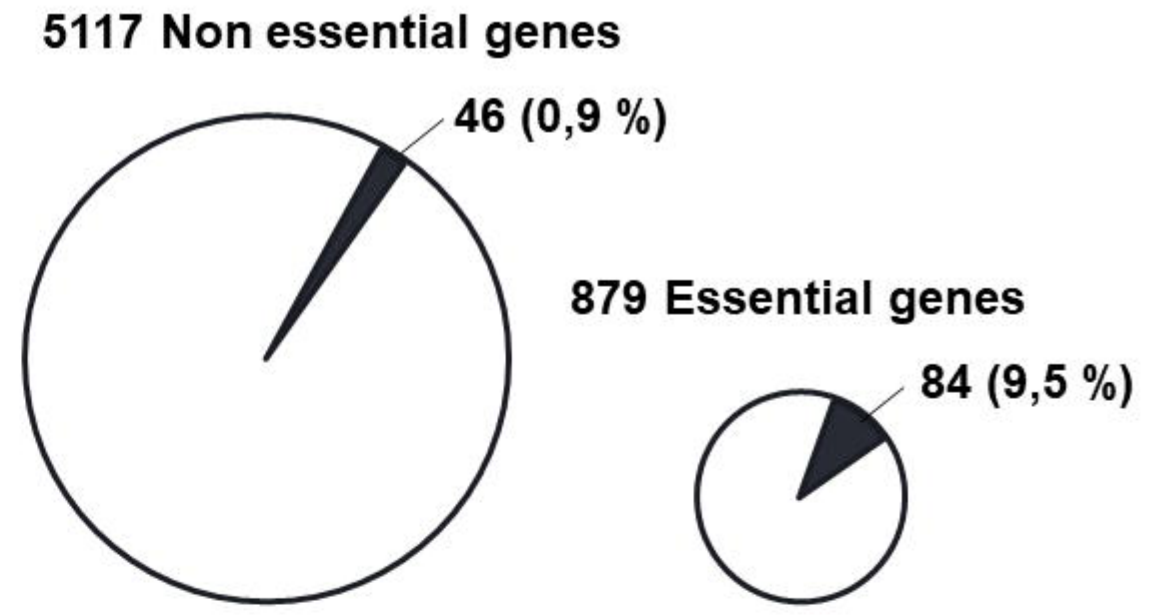**D**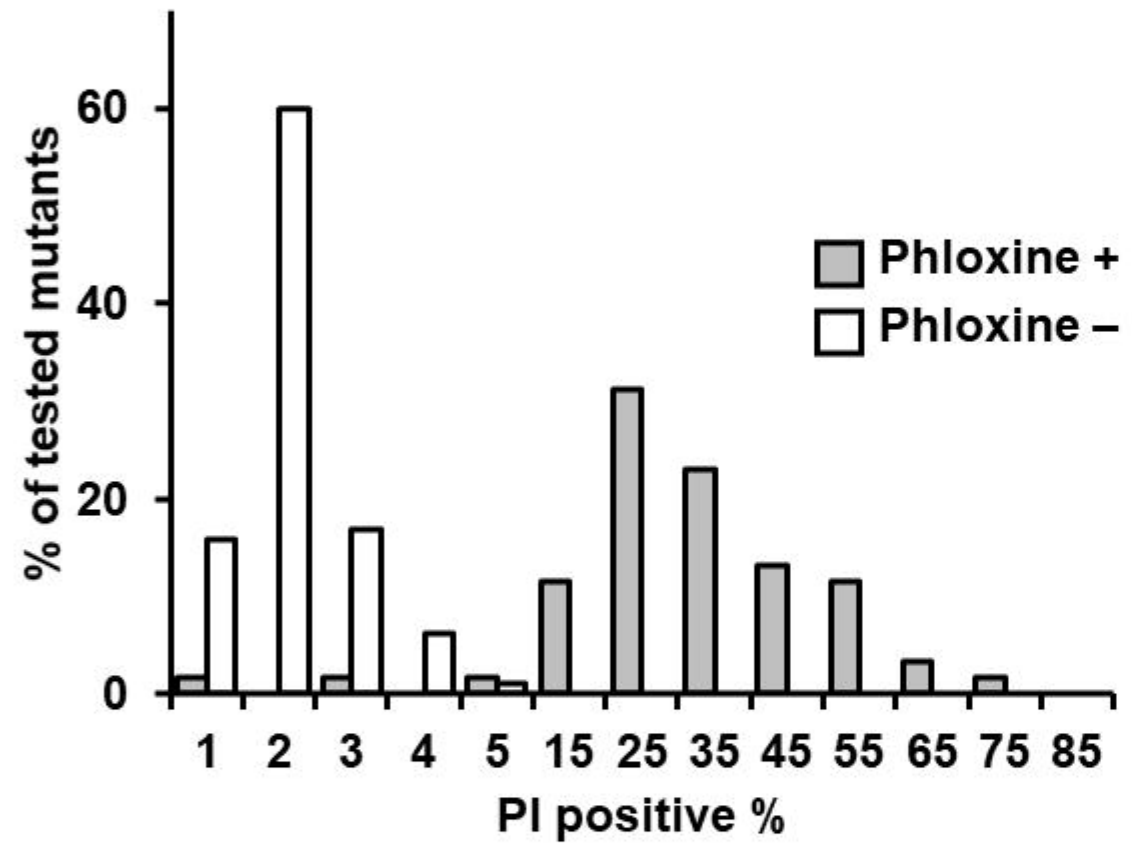**E**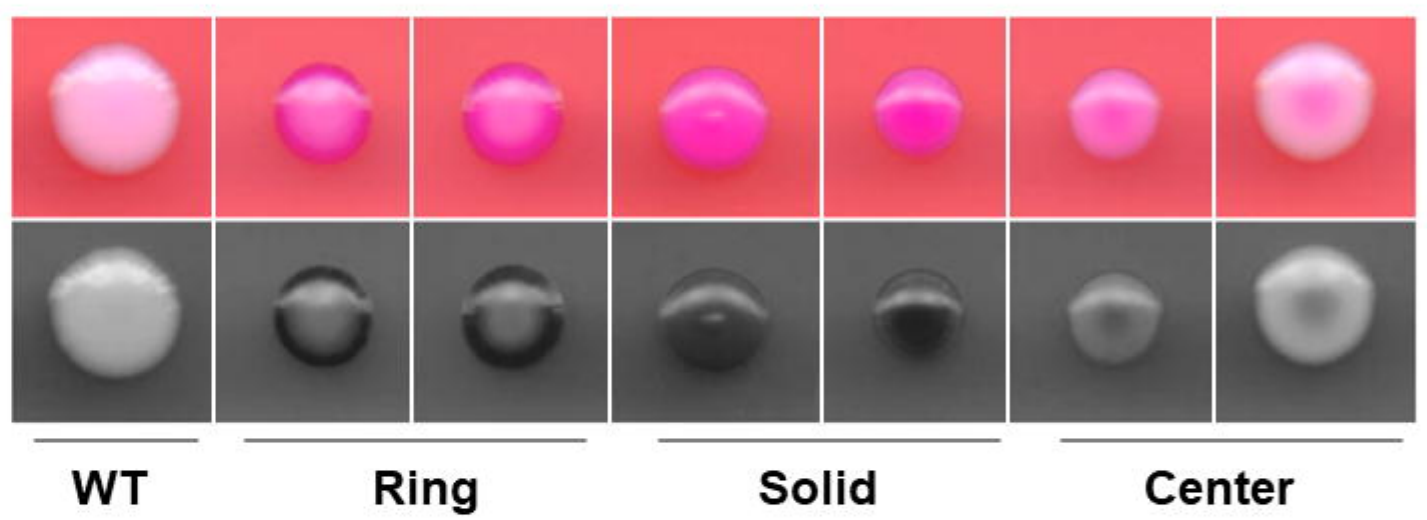**F**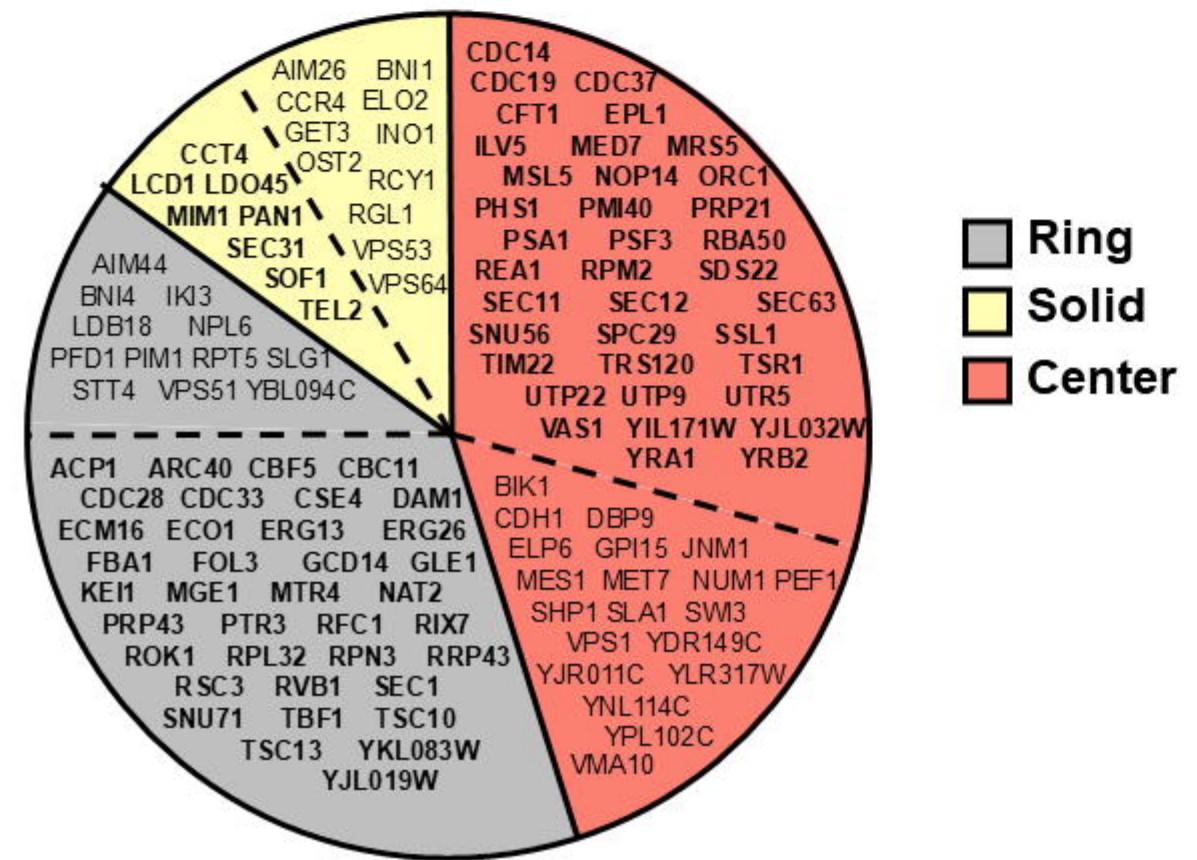**G**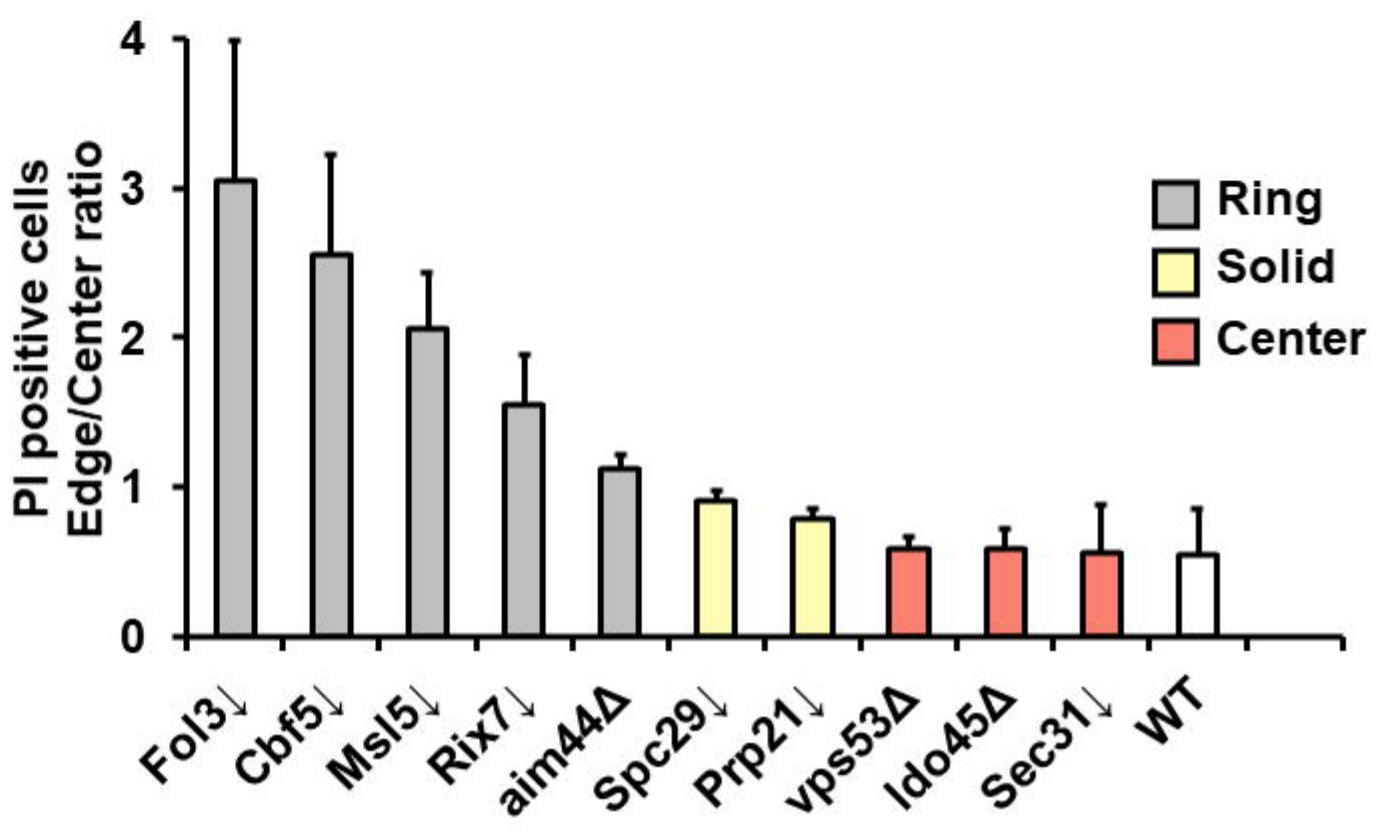



**A**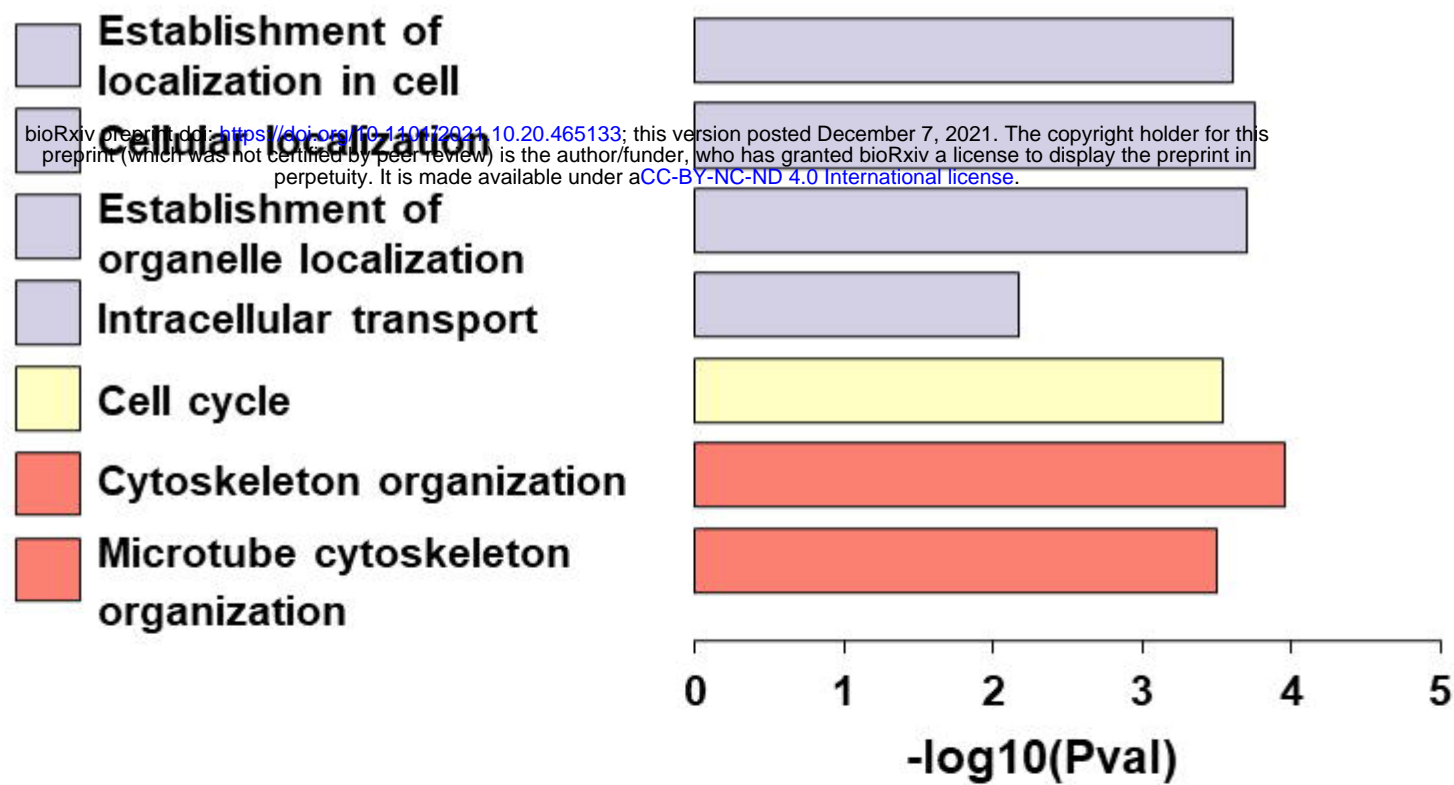**B**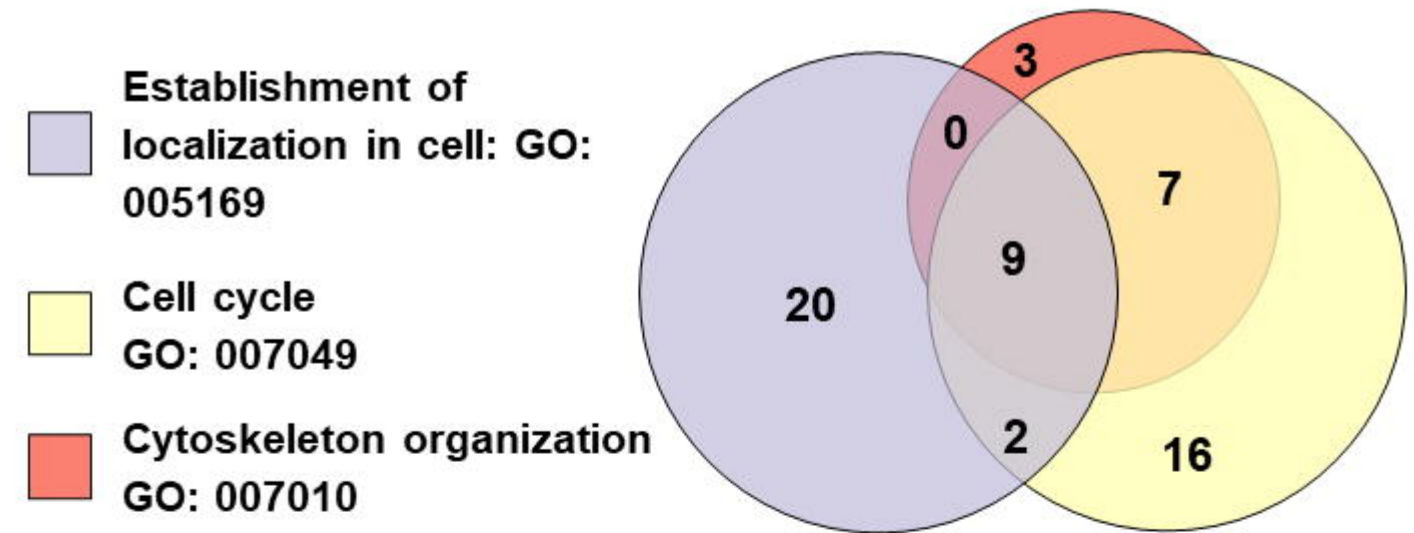**C**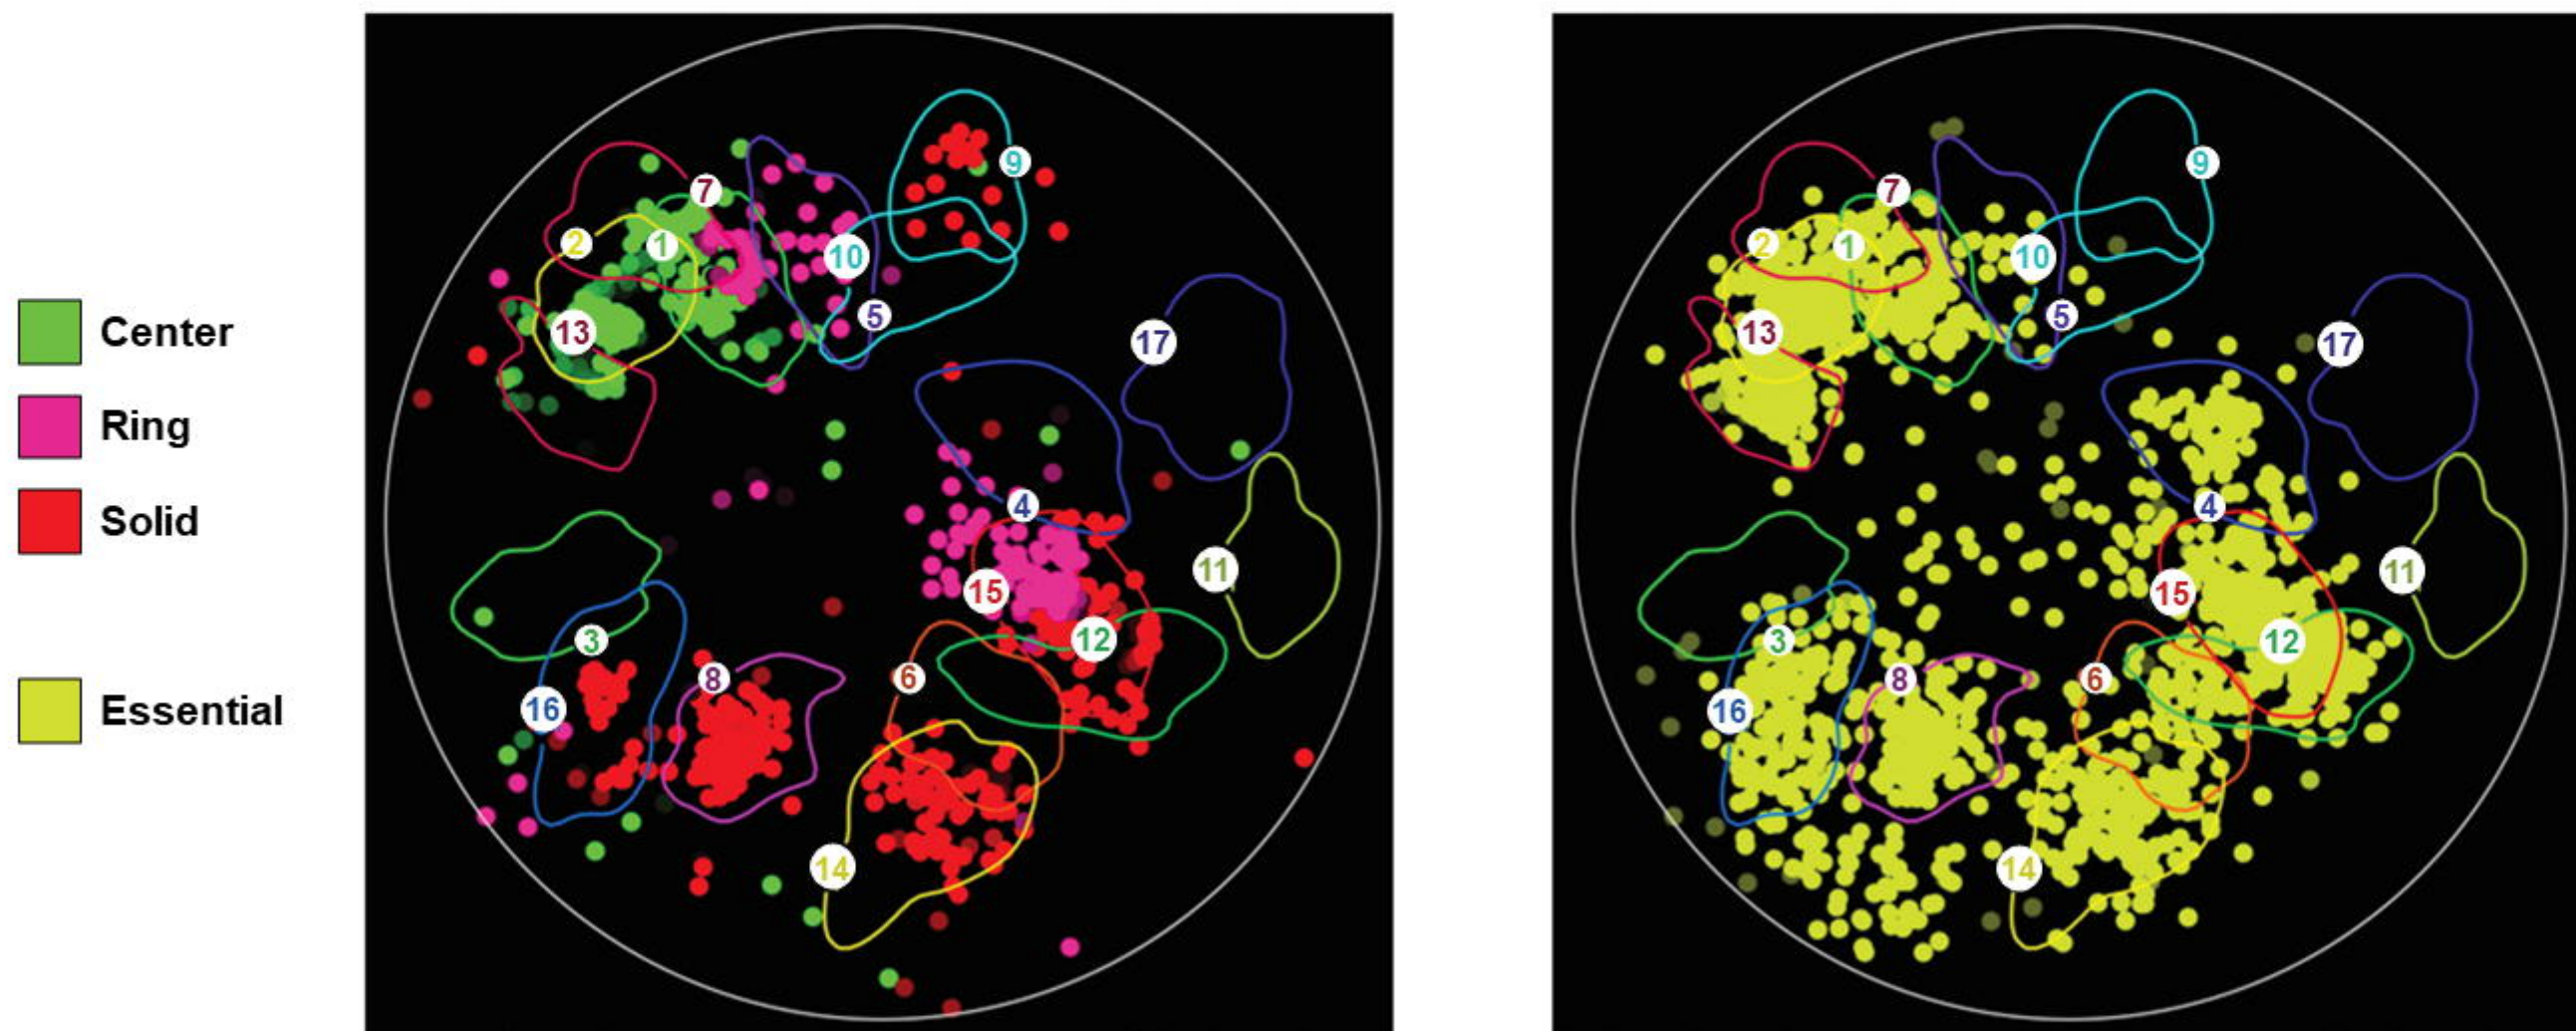

Cluster attribution: (1) Cell polarity & morphogenesis; (2) Glycosylation, protein folding/targeting, cell wall biosynthesis; (3) Ribosome biogenesis (4) Protein degradation; (5) Cytokinesis; (6) Nuclear-cytoplasmic transport; (7) MVB sorting & pH-dependent signaling; (8) mRNA processing; (9) tRNA wobble modification; (10) Peroxisome; (11) Metabolism & fatty acid biosynthesis; (12) DNA replication & repair; (13) Vesicle traffic; (14) Transcription & chromatin organization; (15) Mitosis & chromosome segregation (16) rRNA & ncRNA processing; (17) Respiration, oxidative phosphorylation, mitochondrial targeting.

# A DON (Death of Newborns)

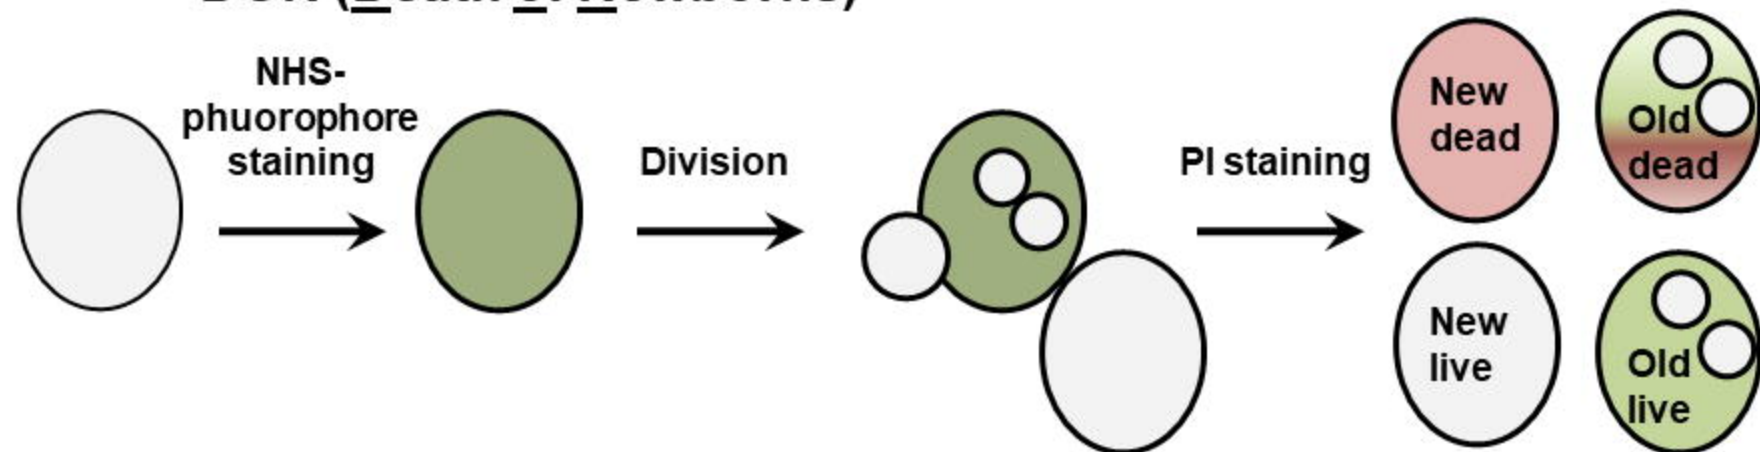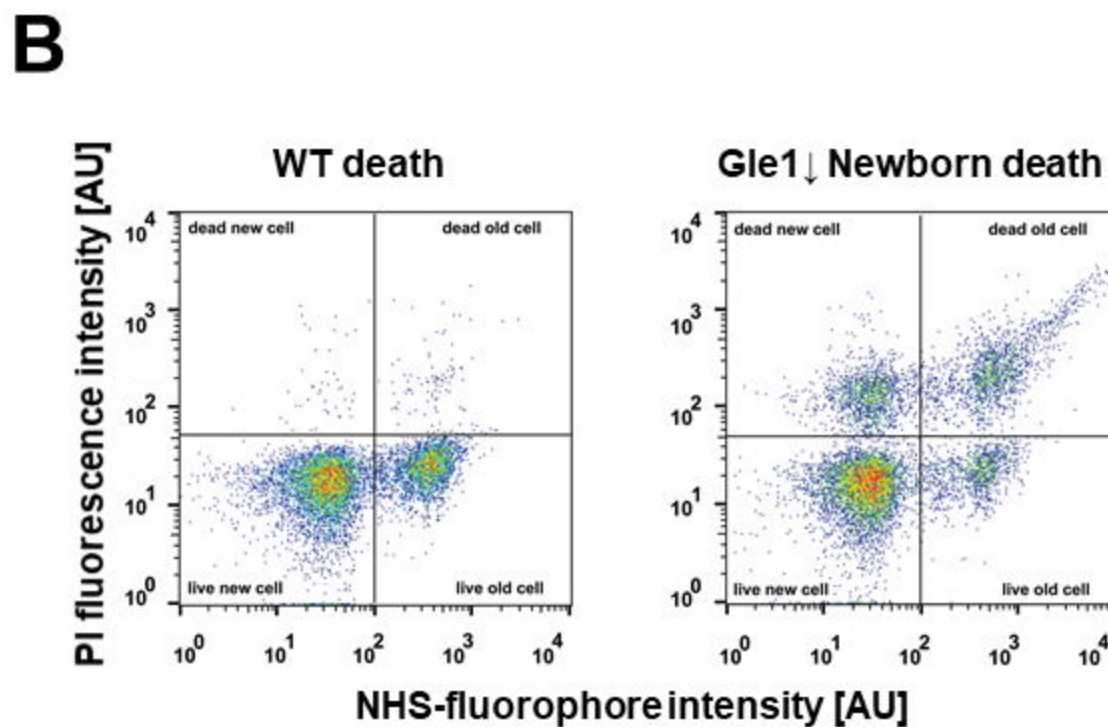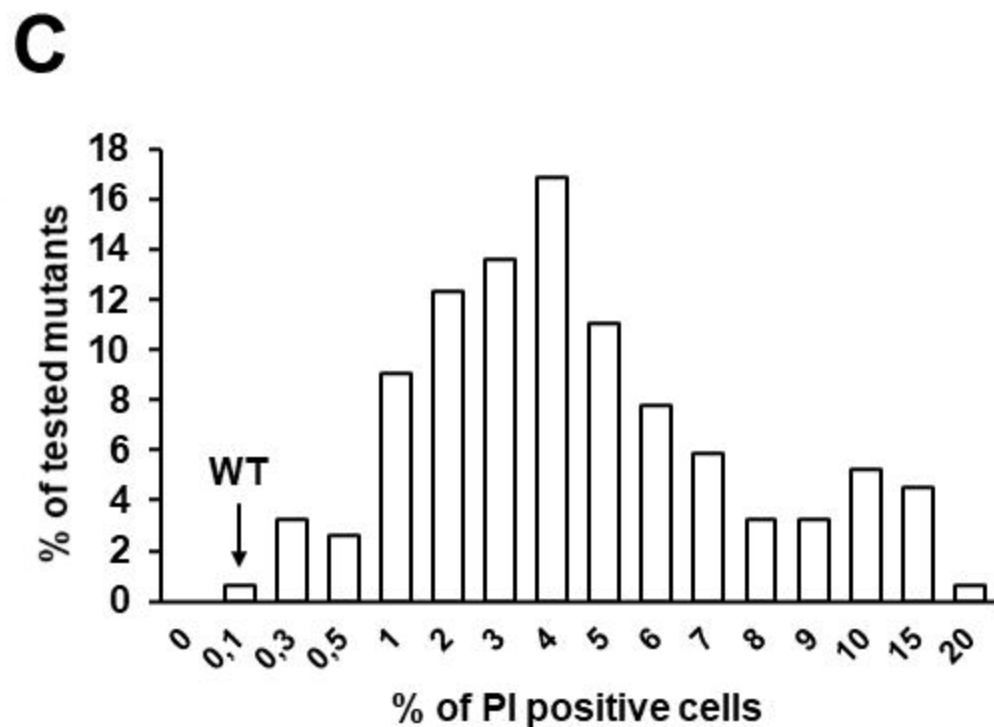



**A**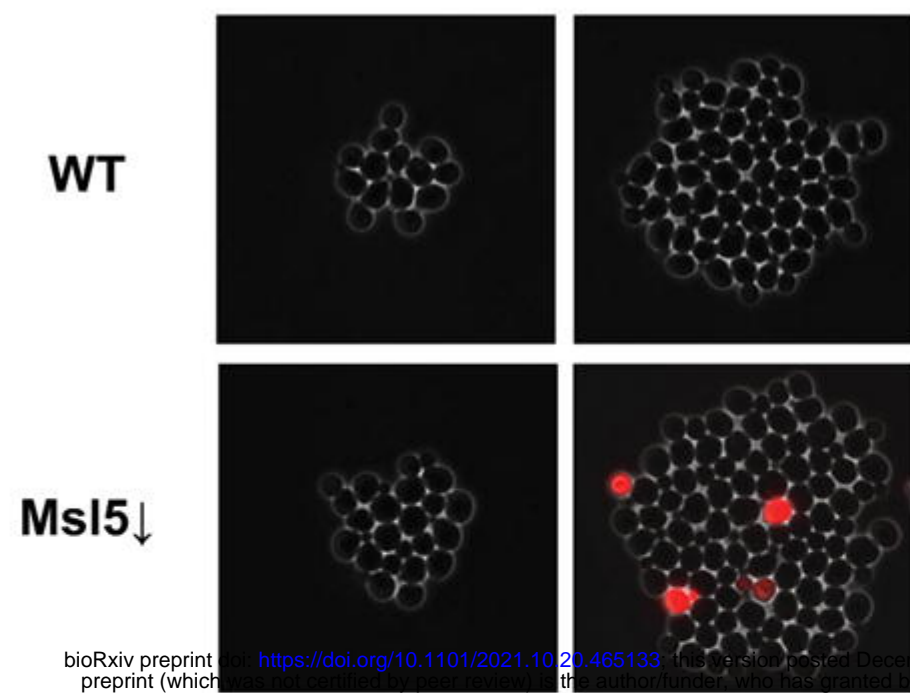**B**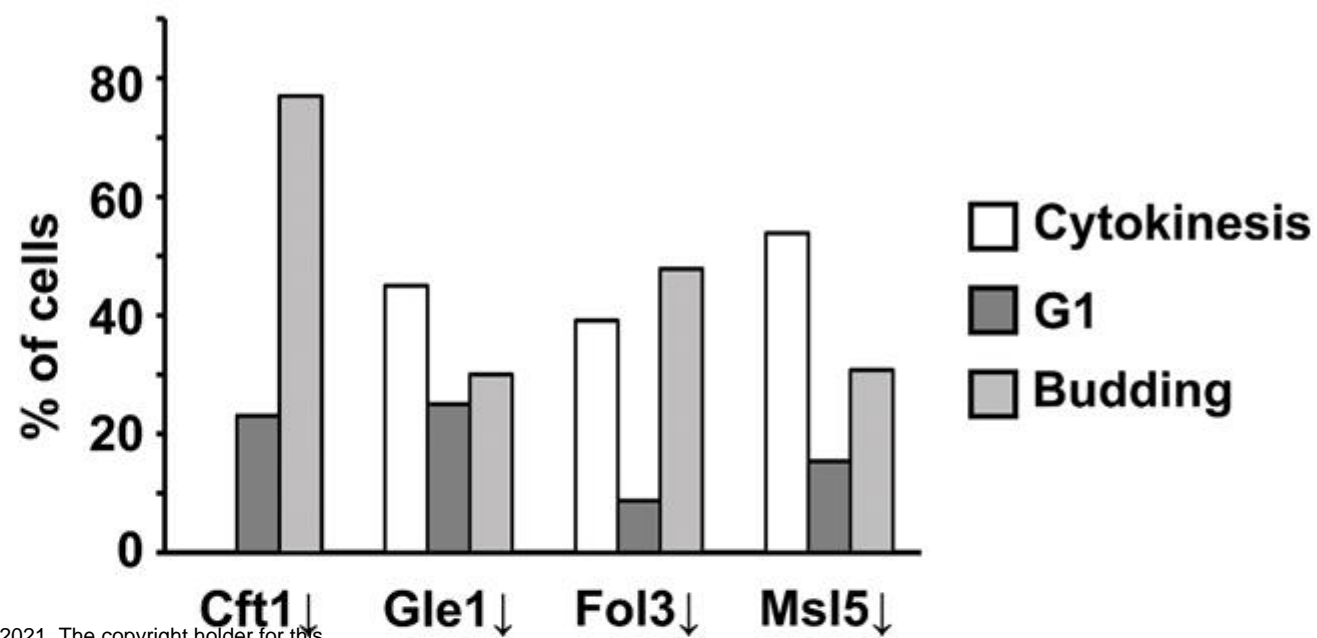

bioRxiv preprint doi: <https://doi.org/10.1101/2021.10.20.465133>; this version posted December 7, 2021. The copyright holder for this preprint (which was not certified by peer review) is the author/funder, who has granted bioRxiv a license to display the preprint in perpetuity. It is made available under aCC-BY-NC-ND 4.0 International license.

**C**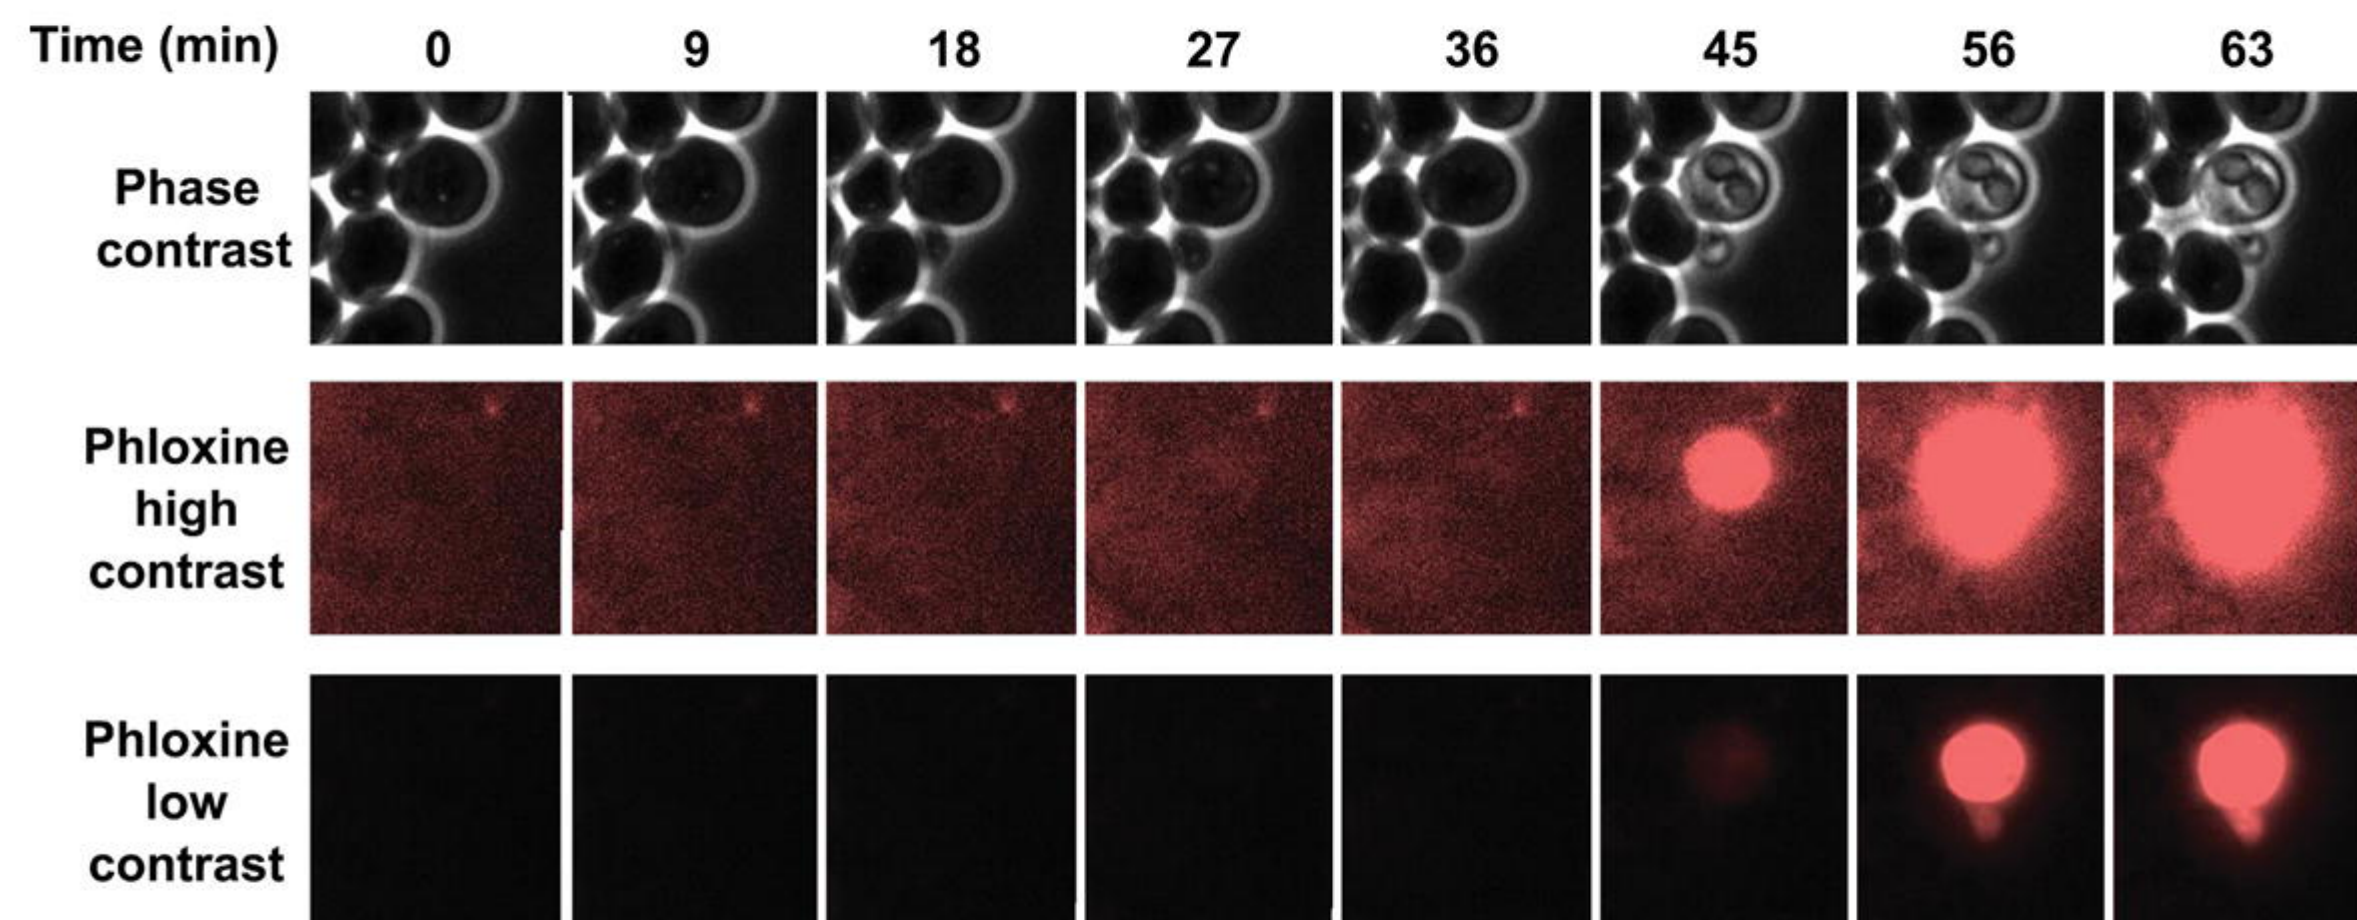**D**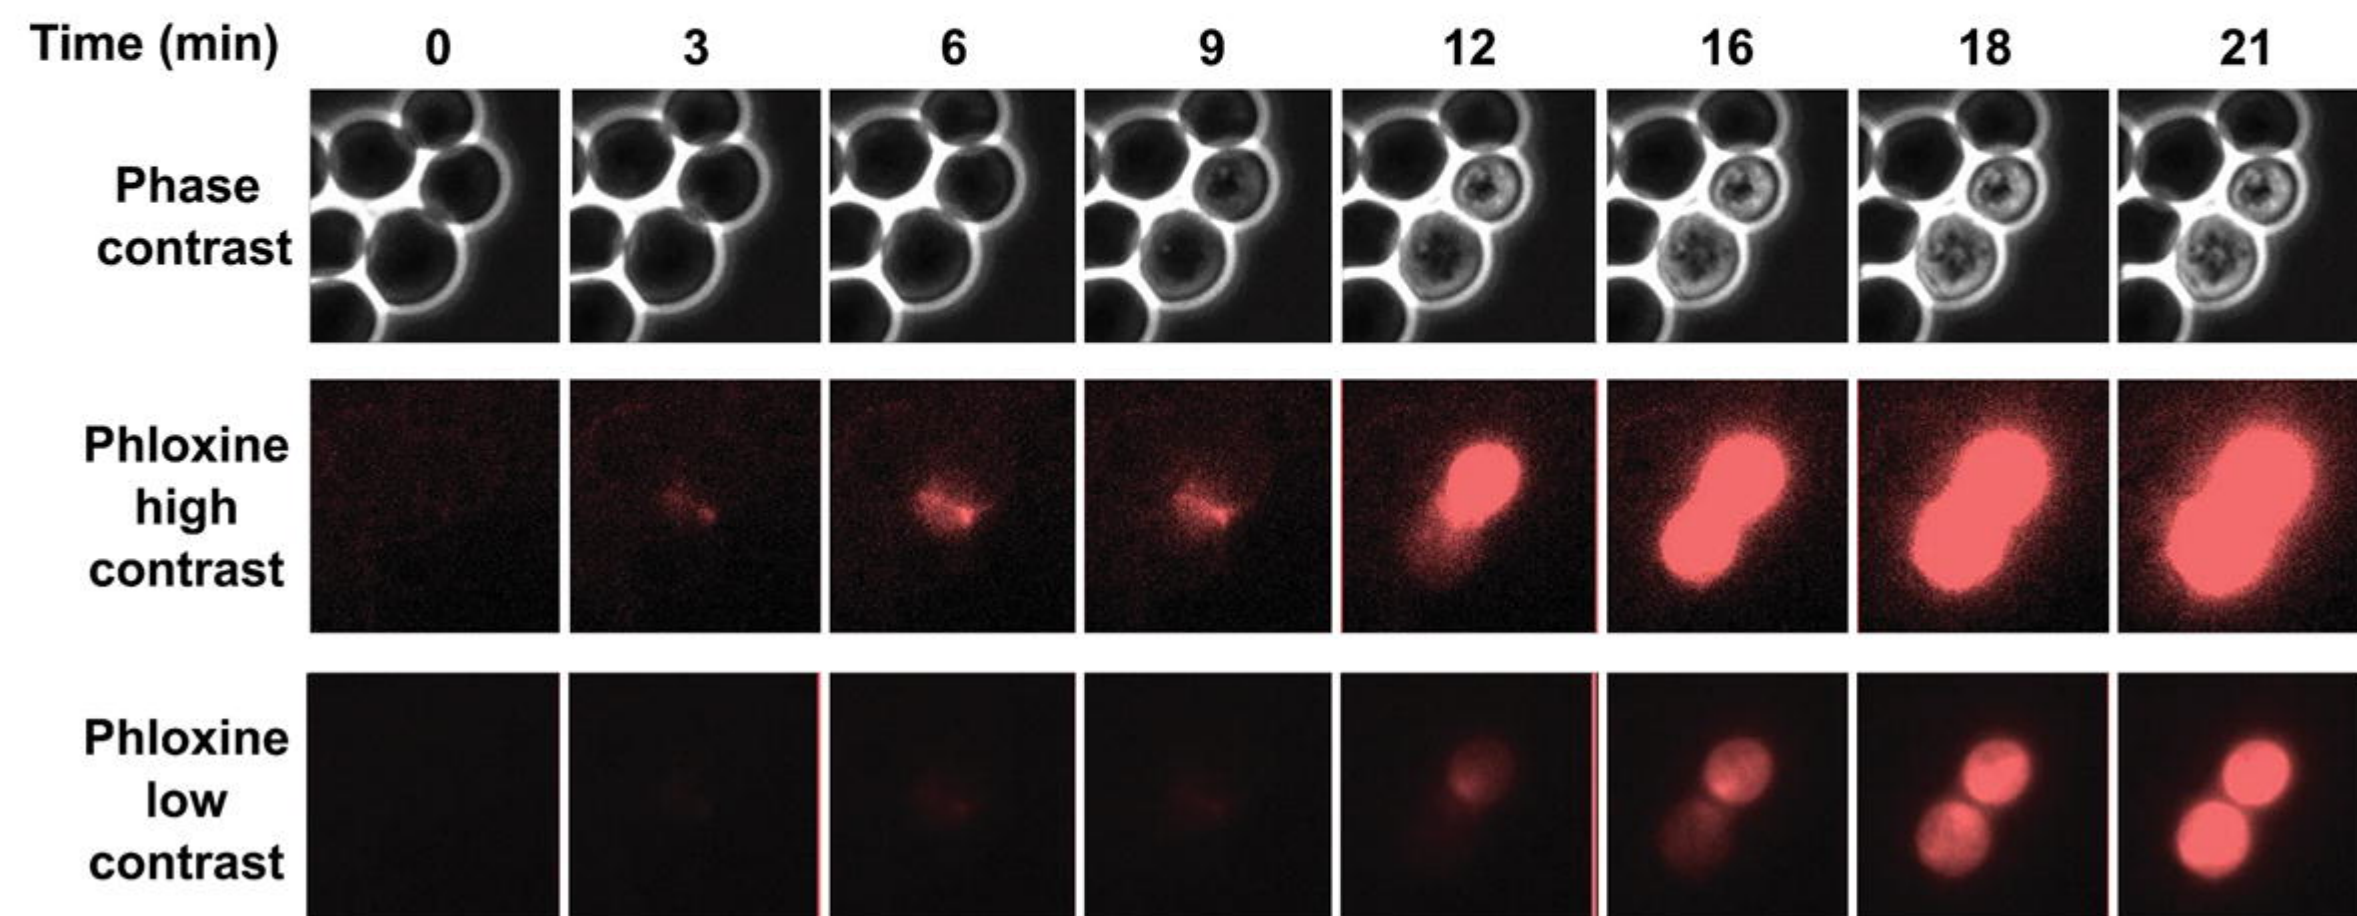

**A**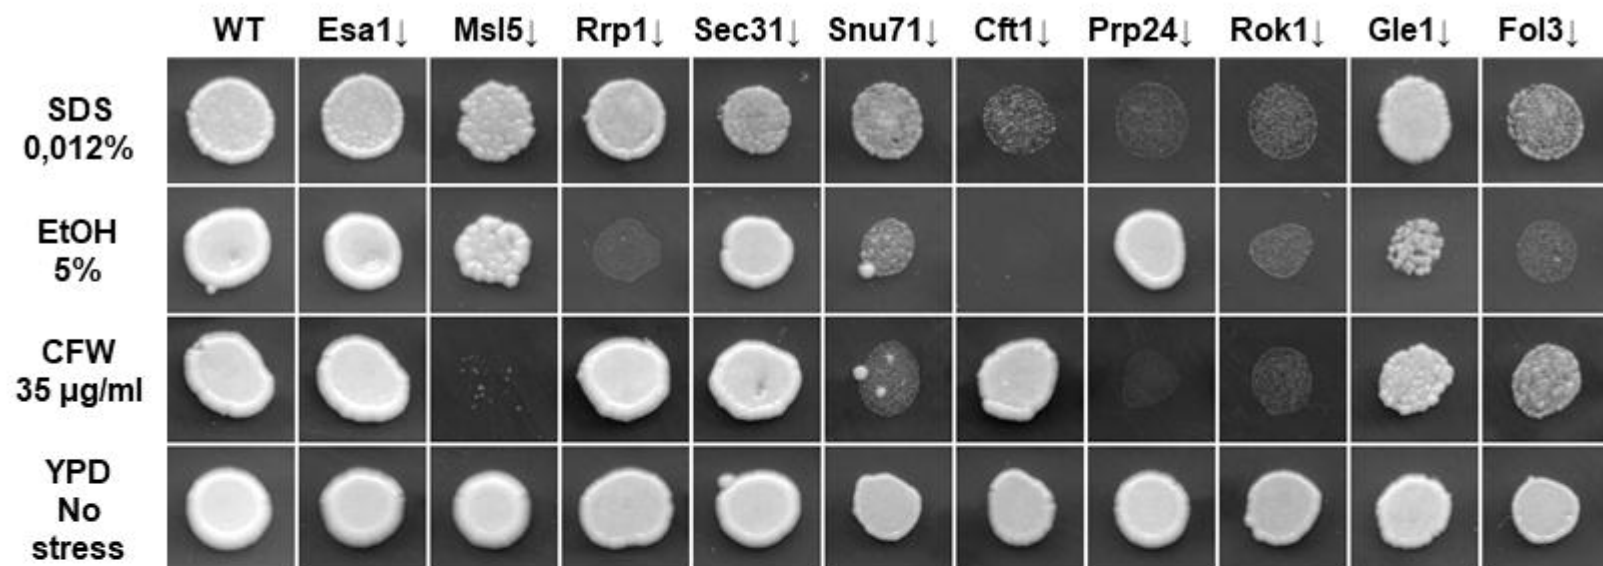**B**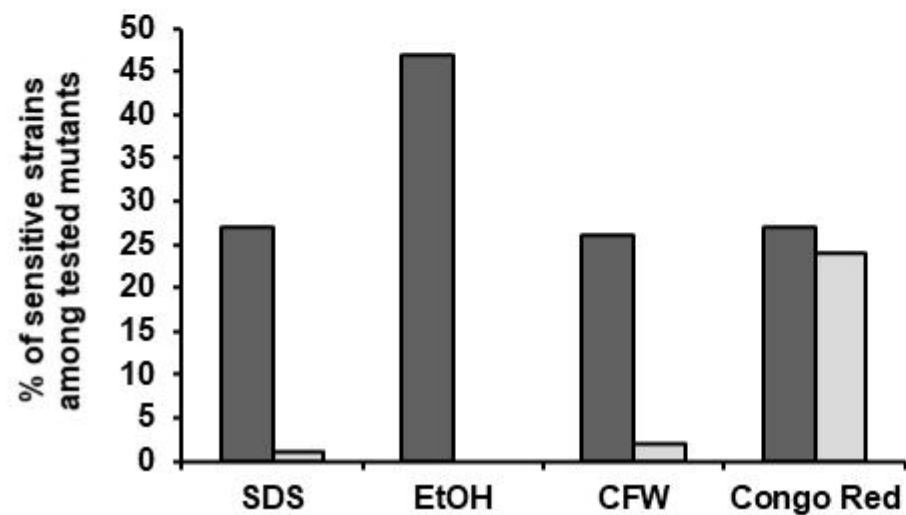**C**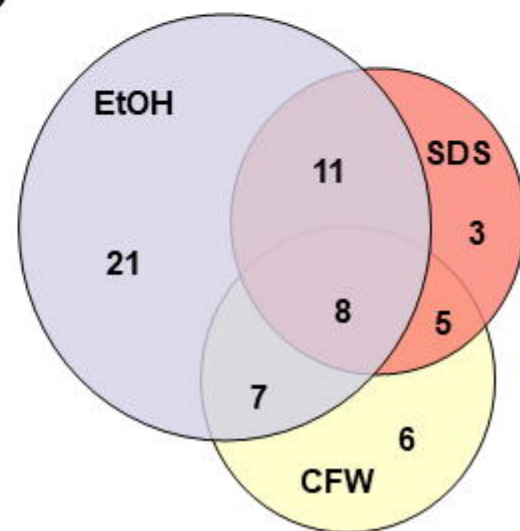

**A**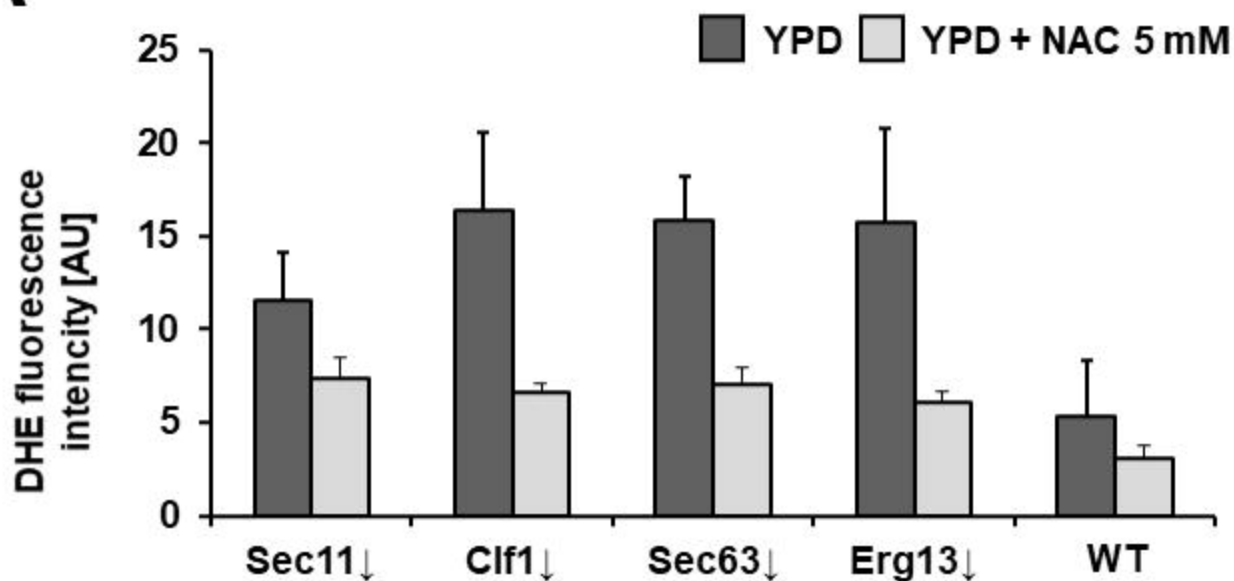**B**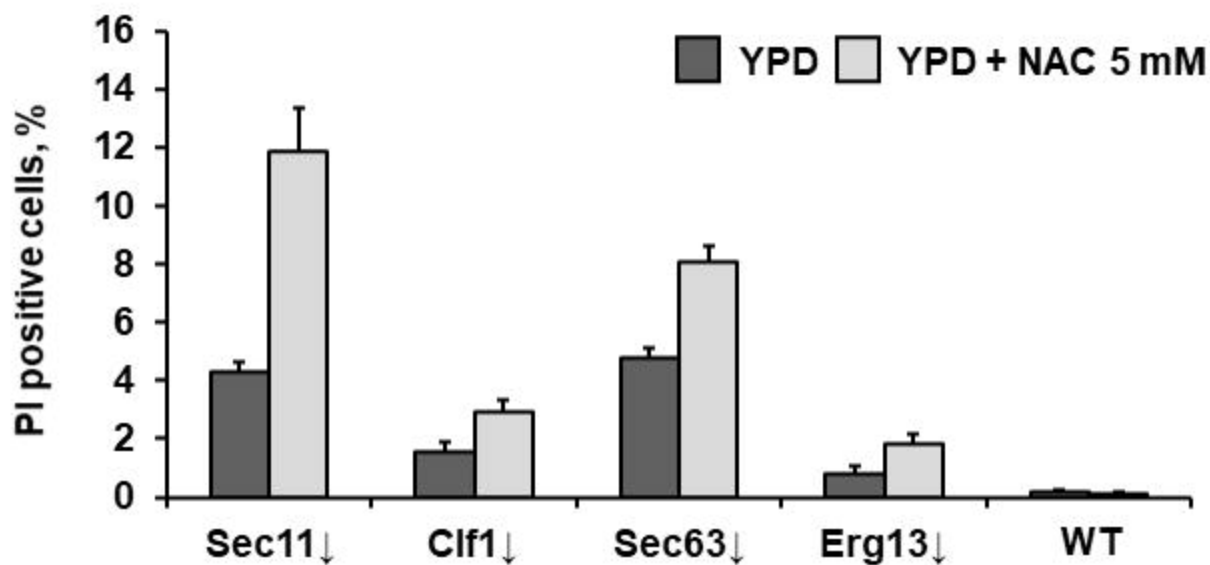

**A**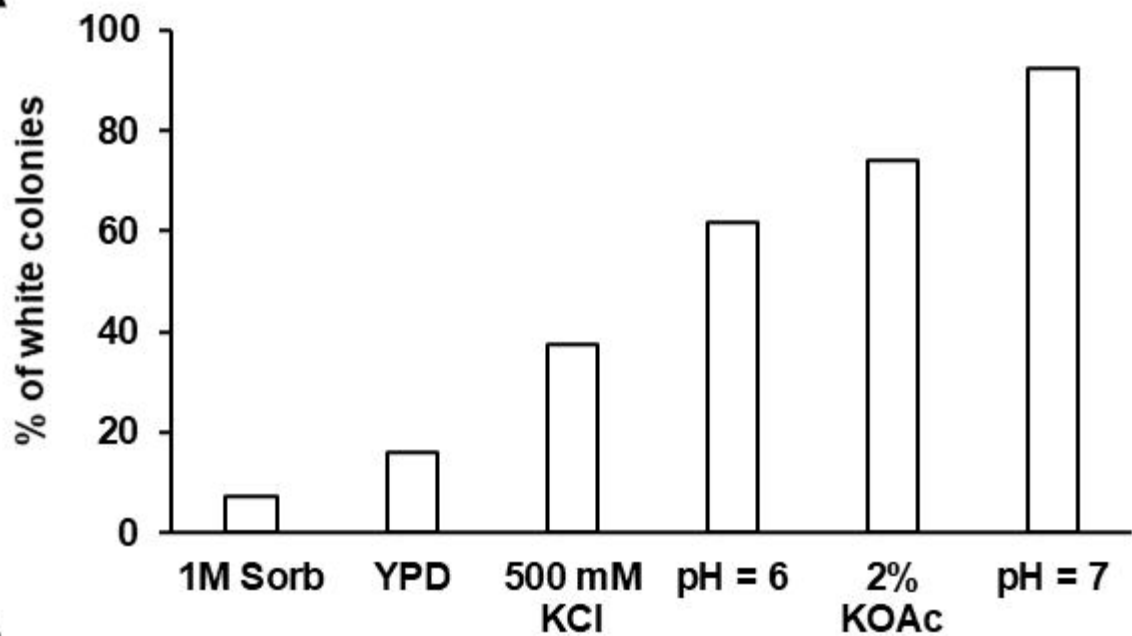**B**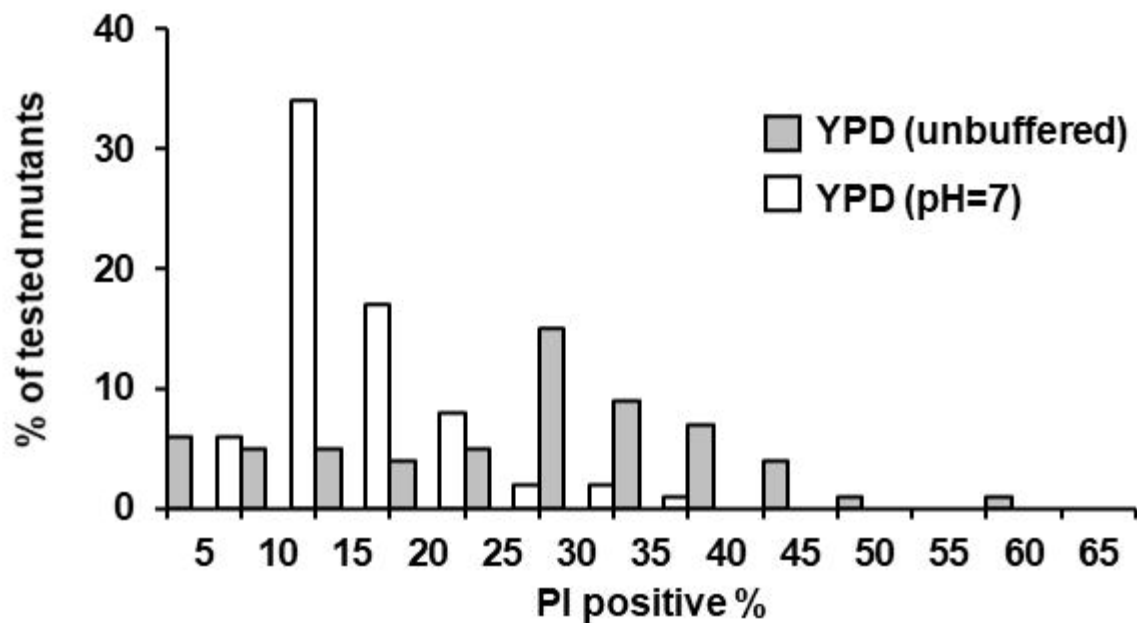

Source: https://www.biorxiv.org/content/biorxiv/early/2021/12/06/2021.10.20.465133.full.pdf
